# Supplementary material for: A straightforward synthesis of functionalized 6H-benzo[c]chromenes from 3-alkenyl chromenes by intermolecular Diels–Alder/aromatization sequence
Source: Royal Society of Chemistry journal article supplement (doi:10.1039/d1ob01967h), 2021-01-01

# A Straightforward Synthesis of Functionalized 6*H*-Benzo[*c*]chromenes from 3-Alkenyl Chromenes by Intermolecular Diels-Alder/Aromatization Sequence

Marco Ballarotto, Mario Solinas and Andrea Temperini\*

Dipartimento di Scienze Farmaceutiche, Università di Perugia, Via del Liceo 1, 06123 Perugia, Italy

\* andrea.temperini@unipg.it

## Computational workflow and data

|                                                |     |
|------------------------------------------------|-----|
| Kinetic analysis method                        | S3  |
| Transition States for the reaction of diene 2g | S4  |
| Transition States for the reaction of diene 13 | S13 |
| Transition States for the reaction of diene 15 | S22 |

## Copies of the <sup>1</sup>H and <sup>13</sup>C{<sup>1</sup>H} NMR spectra

|    |     |
|----|-----|
| 1f | S31 |
| 1j | S33 |
| 1k | S34 |
| 1m | S35 |
| 1n | S36 |
| 2b | S38 |
| 2c | S40 |
| 2d | S42 |
| 2f | S44 |
| 2j | S46 |
| 2k | S48 |
| 2l | S50 |
| 2m | S52 |
| 2n | S54 |
| 4a | S56 |
| 4b | S58 |
| 4c | S60 |
| 4d | S62 |
| 4e | S64 |
| 4f | S66 |
| 4g | S68 |
| 4h | S70 |
| 4i | S72 |
| 4j | S74 |
| 4k | S76 |
| 4l | S78 |

4m  
4n  
4n'  
5a  
5b  
5c  
6  
7  
8  
9  
10  
11  
12

S80  
S82  
S84  
S86  
S88  
S90  
S92  
S94  
S96  
S98  
S100  
S102  
S104

## Kinetic analysis approach to the Diels-Alder cycloadditions of dienes with methyl propiolate

Assuming that the Diels-Alder reaction is under kinetic control, the Eyring equation has been used to calculate the relative reaction rates by knowing the relative energy differences between the 4 transition states. The *ortho* and *meta* nomenclature is referred to the relative position of the methyl propiolate carbonyl group and aromatic ring of the 2*H*-chromene core.

$$k_{rel} = e^{\frac{\Delta\Delta G}{RT}}$$

Using the found relative reaction rates, the regioisomeric ratio was calculated as:

$$Product\ ratio_{ortho-para} = \frac{k_{ortho-endo} + k_{ortho-exo}}{k_{meta-endo} + k_{meta-exo}}$$

The Activation Gibbs free energies are calculated by subtracting the energy of the optimized reactants from the energy of the most stable Transition State.

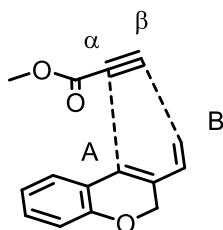

**Scheme S1: Naming scheme of the atoms involved in the Diels-Alder cycloaddition**

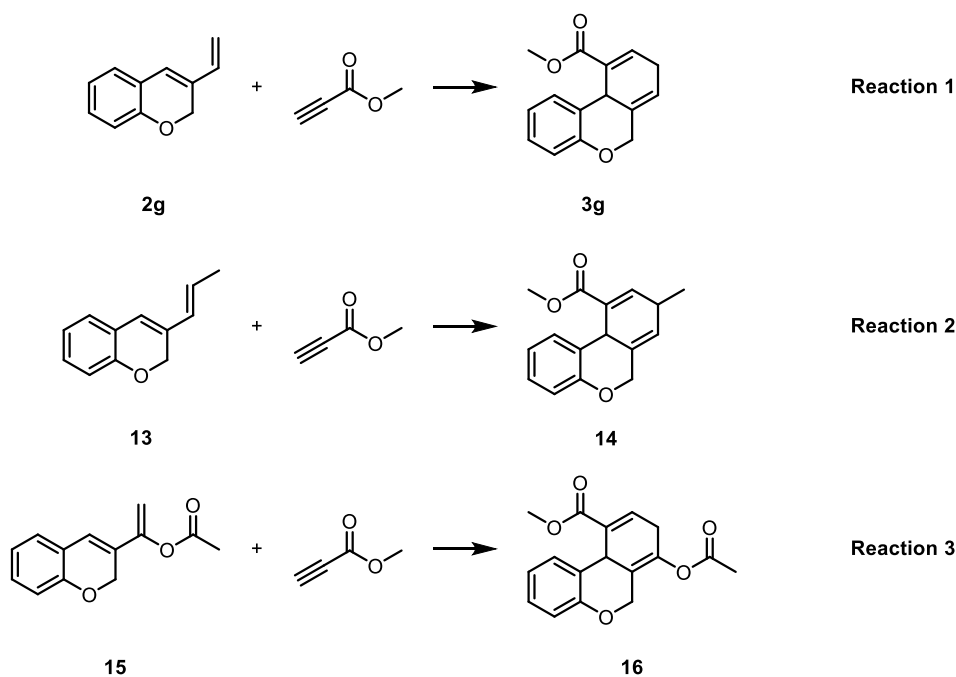

**Scheme S2: Representative reactions used for the computational analyses.**

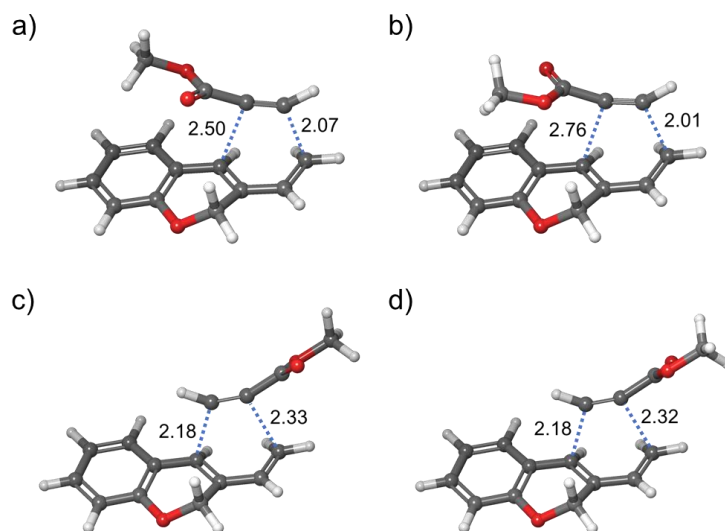

**Figure S1:** Balls-and-sticks representations of the found TSs for the Reaction 1. Carbons, hydrogens and oxygen atoms are coloured in grey, white and red respectively. Atom distances are shown as dashed lines and reported in Å. a) Ortho-endo TS. b) Ortho-exo TS. c) Meta-endo TS. d) Meta-exo TS.

**Table S1:** M06-2X-D3/6-31+G\*\* ZPE-corrected gas phase energies of the located Transition States and relative reaction rates for Reaction 1.

| Transition State             | Total Gibbs Free Energy (Hartree) | Relative Energy (kcal/mol) | Relative reaction rate ( $k_{rel}$ ) | Predicted product ratio | Experimental product ratio |
|------------------------------|-----------------------------------|----------------------------|--------------------------------------|-------------------------|----------------------------|
| TS <sub>2g</sub> -ortho-endo | -805.045295                       | 0.6237                     | 12.4                                 | 95                      | 100                        |
| TS <sub>2g</sub> -ortho-exo  | -805.046289                       | 0.0000                     | 26.3                                 |                         |                            |
| TS <sub>2g</sub> -meta-endo  | -805.042004                       | 2.6888                     | 1.0                                  | 5                       | Not detected               |
| TS <sub>2g</sub> -meta-exo   | -805.041957                       | 2.7183                     | 1.0                                  |                         |                            |

**Table S2:** Bond lengths and negative frequencies of the located TSs for Reaction 1.

| Transition State             | Bond lengths (Å)                        | Negative frequency       |
|------------------------------|-----------------------------------------|--------------------------|
| TS <sub>2g</sub> -ortho-endo | $\alpha$ -A = 2.50<br>$\beta$ -B = 2.07 | -487.96 cm <sup>-1</sup> |
| TS <sub>2g</sub> -ortho-exo  | $\alpha$ -A = 2.76<br>$\beta$ -B = 2.01 | -470.80 cm <sup>-1</sup> |
| TS <sub>2g</sub> -meta-endo  | $\alpha$ -B = 2.33<br>$\beta$ -A = 2.18 | -487.67 cm <sup>-1</sup> |
| TS <sub>2g</sub> -meta-exo   | $\alpha$ -B = 2.32<br>$\beta$ -A = 2.18 | -491.42 cm <sup>-1</sup> |

**Optimized geometries and Z-Matrices of the located transition states for Reaction 1 at the B3LYP-D3/6-31+G\*\* level of theory**



Figure S2: TS<sub>2g</sub>-ortho-endo optimized geometry

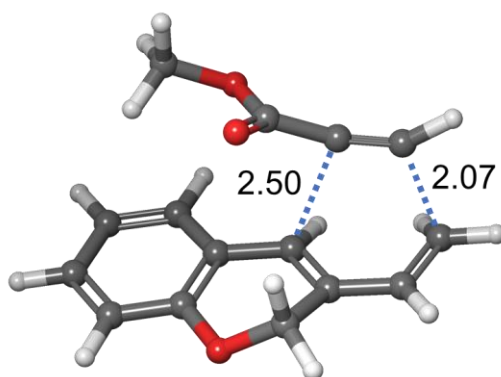

O 1

|   |                  |                  |                  |
|---|------------------|------------------|------------------|
| C | 0.000000000000   | 0.000000000000   | 0.000000000000   |
| C | 0.000000000000   | 0.000000000000   | 1.3937071926200  |
| C | 1.1981248900999  | 0.000000000000   | 2.1007451995348  |
| C | 2.4005362259450  | 0.0113091216926  | 1.4046977910545  |
| C | 2.4229998849387  | -0.0046363202607 | 0.0006399513773  |
| C | 1.2076610677366  | -0.0114137507147 | -0.6871007835501 |
| O | 3.5599928500642  | -0.0413614287376 | 2.1194316735201  |
| C | 4.6976205894664  | 0.5402593888899  | 1.4967748197581  |
| C | 4.8449819678458  | 0.1558386681334  | 0.0426011281664  |
| C | 3.7237561082645  | -0.0842126215676 | -0.6545160262851 |
| C | 6.1963385059680  | 0.1150207020363  | -0.5268655612490 |
| C | 6.5043008237074  | 0.4446075712856  | -1.7829147751278 |
| H | -0.9369918851825 | 0.0012680427787  | -0.5459465432779 |
| H | -0.9396914538204 | 0.0013754959401  | 1.9365073024923  |
| H | 1.2234579866793  | -0.0062491518613 | 3.1847642462648  |
| H | 1.2215718271080  | -0.0312717968124 | -1.7735245946928 |
| H | 3.7667845361242  | -0.3780092857976 | -1.7002233167587 |
| H | 7.5196720130254  | 0.3635700914698  | -2.1539329022027 |
| H | 5.7498661328298  | 0.8125970868196  | -2.4717796176037 |
| H | 6.9922638646675  | -0.1974231626866 | 0.1489554857379  |

|   |                  |                 |                  |
|---|------------------|-----------------|------------------|
| H | 5.5575131165564  | 0.2003564453942 | 2.0799904940125  |
| H | 4.6414382047085  | 1.6369486529485 | 1.5890308513002  |
| C | 4.8815965146491  | 3.5457203557836 | -2.0109305559582 |
| C | 3.7613035413231  | 3.4932238029681 | -1.5235819073656 |
| C | 2.3415846422565  | 3.4742055881784 | -0.8447659809223 |
| O | 2.1636829575245  | 3.7086127884656 | 0.3510678872002  |
| O | 1.3727258230722  | 3.1748554722119 | -1.7322197350095 |
| C | 0.0122790979482  | 3.1330299521537 | -1.3205395221471 |
| H | -0.6252978975773 | 2.8617158770356 | -2.1618846033229 |
| H | -0.1435330720737 | 2.3954750071705 | -0.5299314574672 |
| H | -0.3138877020821 | 4.1063526331568 | -0.9491707032484 |
| H | 5.8640321895173  | 3.5980048076843 | -2.4253148248615 |

Zero Point Energy: 160.333 kcal/mol

Total internal energy: -804.988215 Hartrees

Total enthalpy: -804.987271 Hartrees

Total Gibbs free energy: -805.045295 Hartrees

Number of negative frequencies: 1

Frequency: -487.96

Red. Masses: 3.14

Frc. const.: 0.44

IR inten.: 16.62

Figure S3: TS<sub>2g</sub>-ortho-exo optimized geometry

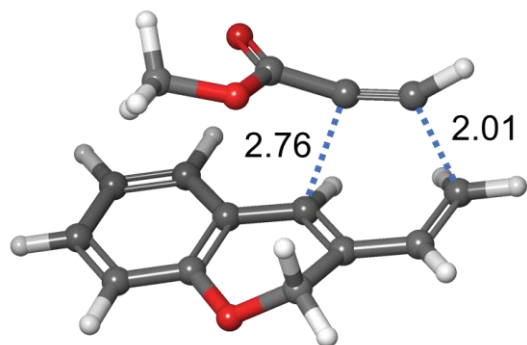

0 1

|   |                 |                 |                 |
|---|-----------------|-----------------|-----------------|
| C | -3.756948000000 | 3.038179000000  | -1.685068000000 |
| C | -3.051988000000 | 3.767071000000  | -0.718256000000 |
| C | -2.067106000000 | 3.152838000000  | 0.059650000000  |
| C | -1.776820000000 | 1.804563000000  | -0.142966000000 |
| C | -2.480694000000 | 1.046533000000  | -1.109649000000 |
| C | -3.477828000000 | 1.686374000000  | -1.870464000000 |
| O | -0.858333000000 | 1.211900000000  | 0.676821000000  |
| C | -0.178779000000 | 0.071461000000  | 0.126350000000  |
| C | -1.108047000000 | -0.909004000000 | -0.557898000000 |
| C | -2.185493000000 | -0.364172000000 | -1.229117000000 |
| C | -0.701172000000 | -2.249636000000 | -0.702133000000 |
| C | -1.261451000000 | -3.117562000000 | -1.643159000000 |
| H | -4.519215000000 | 3.522236000000  | -2.287011000000 |
| H | -3.270066000000 | 4.820247000000  | -0.566364000000 |
| H | -1.519805000000 | 3.698280000000  | 0.821179000000  |
| H | -4.007293000000 | 1.113275000000  | -2.624090000000 |
| H | -2.909838000000 | -0.988812000000 | -1.738690000000 |
| H | -0.859014000000 | -4.125301000000 | -1.707497000000 |

|   |                  |                  |                  |
|---|------------------|------------------|------------------|
| H | -2.3199210000000 | -3.0576010000000 | -1.8770410000000 |
| H | 0.2337060000000  | -2.5439920000000 | -0.2275360000000 |
| H | 0.3460710000000  | -0.3869540000000 | 0.9670850000000  |
| H | 0.5662840000000  | 0.4302700000000  | -0.6019630000000 |
| C | -0.7515620000000 | -2.3100670000000 | -3.4114850000000 |
| C | -1.0277670000000 | -1.1109280000000 | -3.6182070000000 |
| C | -1.3116500000000 | 0.2375280000000  | -3.9780120000000 |
| O | -2.3468800000000 | 0.6201380000000  | -4.5091570000000 |
| O | -0.2874910000000 | 1.0707060000000  | -3.6499570000000 |
| C | -0.5008610000000 | 2.4622410000000  | -3.9651900000000 |
| H | 0.4169540000000  | 2.9663380000000  | -3.6629840000000 |
| H | -0.6764600000000 | 2.5897560000000  | -5.0364460000000 |
| H | -1.3555180000000 | 2.8526600000000  | -3.4084190000000 |
| H | -0.2957280000000 | -3.1650780000000 | -3.8813930000000 |

Zero Point Energy: 159.631 kcal/mol

Total internal energy: -804.989090 Hartrees

Total enthalpy: -804.988146 Hartrees

Total Gibbs free energy: --805.046289 Hartrees

Number of negative frequencies: 1

Frequency: -470.80

Red. Masses: 3.92

Frc. const.: 0.51

IR inten.: 57.77

Figure S4: TS<sub>2g</sub>-meta-endo optimized geometry

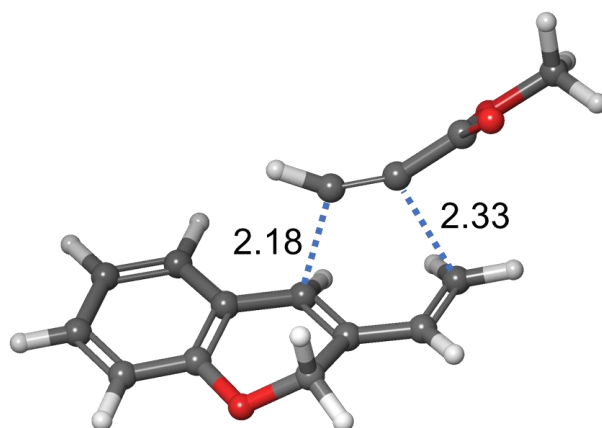

0 1

|   |                  |                  |                  |
|---|------------------|------------------|------------------|
| C | -0.1282350000000 | -1.5678890000000 | -3.3477790000000 |
| C | -0.6238130000000 | -0.4393560000000 | -3.1604460000000 |
| C | 0.6647740000000  | -2.5713160000000 | -4.0188020000000 |
| O | 1.8796850000000  | -2.6458390000000 | -3.9754570000000 |
| O | -0.1193410000000 | -3.4505830000000 | -4.6930470000000 |
| C | 0.5858370000000  | -4.5026090000000 | -5.3820160000000 |
| H | -0.1885970000000 | -5.1035530000000 | -5.8584770000000 |
| H | 1.2650670000000  | -4.0836380000000 | -6.1289210000000 |
| H | 1.1623510000000  | -5.1042030000000 | -4.6737300000000 |
| H | -0.7672650000000 | 0.5793130000000  | -3.4686180000000 |
| C | -3.5514020000000 | 3.0498590000000  | -1.9067840000000 |
| C | -3.1977830000000 | 3.7135130000000  | -0.7250650000000 |
| C | -2.3841930000000 | 3.0885130000000  | 0.2200540000000  |
| C | -1.9138530000000 | 1.7959550000000  | -0.0216440000000 |
| C | -2.2734600000000 | 1.1014190000000  | -1.1954930000000 |
| C | -3.0948590000000 | 1.7519290000000  | -2.1302170000000 |
| O | -1.1606270000000 | 1.1975990000000  | 0.9514620000000  |
| C | -0.2664970000000 | 0.1735390000000  | 0.4883320000000  |
| C | -0.9384440000000 | -0.8209140000000 | -0.4269880000000 |
| C | -1.8373020000000 | -0.2925950000000 | -1.3559410000000 |

|   |                  |                  |                  |
|---|------------------|------------------|------------------|
| C | -0.4219030000000 | -2.1233680000000 | -0.5380440000000 |
| C | -0.7486400000000 | -2.9636740000000 | -1.5827680000000 |
| H | -4.1840260000000 | 3.5387640000000  | -2.6407990000000 |
| H | -3.5545010000000 | 4.7222930000000  | -0.5396500000000 |
| H | -2.1028980000000 | 3.5810880000000  | 1.1449130000000  |
| H | -3.3835280000000 | 1.2192910000000  | -3.0334620000000 |
| H | -2.5292620000000 | -0.9504040000000 | -1.8710520000000 |
| H | -0.2072220000000 | -3.8943820000000 | -1.7193210000000 |
| H | -1.7003090000000 | -2.9060330000000 | -2.0976890000000 |
| H | 0.4217810000000  | -2.3899460000000 | 0.0966130000000  |
| H | 0.1214550000000  | -0.3075320000000 | 1.3882650000000  |
| H | 0.5734740000000  | 0.6578050000000  | -0.0377530000000 |

Zero Point Energy: 159.578 kcal/mol

Total internal energy: -804.984600 Hartrees

Total enthalpy: -804.983656 Hartrees

Total Gibbs free energy: -805.042004 Hartrees

Number of negative frequencies: 1

Frequency: -487.67

Red. Masses: 2.41

Frc. const.: 0.34

IR inten.: 3.85

Figure S5: TS<sub>2g</sub>-meta-exo optimized geometry

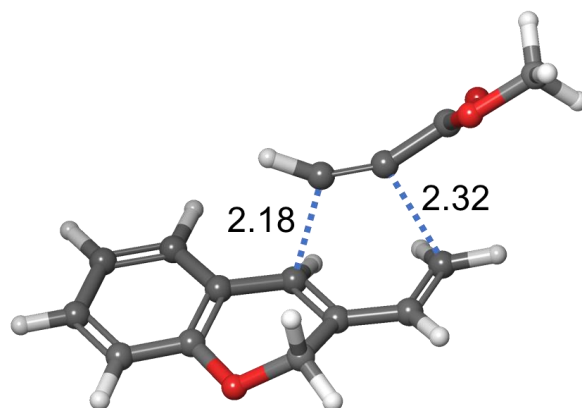

0 1

|   |                 |                 |                 |
|---|-----------------|-----------------|-----------------|
| C | -3.562602000000 | 3.070427000000  | -1.940272000000 |
| C | -3.225288000000 | 3.738539000000  | -0.756210000000 |
| C | -2.424604000000 | 3.116744000000  | 0.202117000000  |
| C | -1.951203000000 | 1.823408000000  | -0.028859000000 |
| C | -2.293973000000 | 1.124692000000  | -1.205112000000 |
| C | -3.103022000000 | 1.771603000000  | -2.152905000000 |
| O | -1.212734000000 | 1.228044000000  | 0.957665000000  |
| C | -0.312710000000 | 0.202314000000  | 0.511775000000  |
| C | -0.968993000000 | -0.794645000000 | -0.412366000000 |
| C | -1.854358000000 | -0.268977000000 | -1.355734000000 |
| C | -0.447309000000 | -2.095292000000 | -0.512530000000 |
| C | -0.749069000000 | -2.936952000000 | -1.564884000000 |
| H | -4.185778000000 | 3.556331000000  | -2.684347000000 |
| H | -3.584964000000 | 4.747824000000  | -0.579011000000 |
| H | -2.156639000000 | 3.612298000000  | 1.129407000000  |
| H | -3.380032000000 | 1.235637000000  | -3.057764000000 |
| H | -2.535884000000 | -0.928380000000 | -1.882554000000 |
| H | -0.203873000000 | -3.866995000000 | -1.691757000000 |
| H | -1.692850000000 | -2.888980000000 | -2.095161000000 |
| H | 0.384389000000  | -2.358550000000 | 0.139369000000  |

|   |                 |                 |                 |
|---|-----------------|-----------------|-----------------|
| H | 0.060156000000  | -0.276656000000 | 1.419239000000  |
| H | 0.536107000000  | 0.684882000000  | -0.001789000000 |
| C | -0.121544000000 | -1.554412000000 | -3.321179000000 |
| C | -0.612909000000 | -0.422154000000 | -3.144691000000 |
| C | 0.594129000000  | -2.594373000000 | -4.023683000000 |
| O | 0.071960000000  | -3.463837000000 | -4.700299000000 |
| O | 1.929770000000  | -2.504546000000 | -3.813598000000 |
| C | 2.721841000000  | -3.526429000000 | -4.452177000000 |
| H | 3.751917000000  | -3.307754000000 | -4.171499000000 |
| H | 2.424927000000  | -4.517313000000 | -4.097470000000 |
| H | 2.598286000000  | -3.484517000000 | -5.537369000000 |
| H | -0.768910000000 | 0.589413000000  | -3.468790000000 |

Zero Point Energy: 159.598 kcal/mol

Total internal energy: -804.984618 Hartrees

Total enthalpy: -804.983674 Hartrees

Total Gibbs free energy: -805.041957 Hartrees

Number of negative frequencies: 1

Frequency: -491.42

Red. Masses: 2.40

Frc. const.: 0.34

IR inten.: 4.43



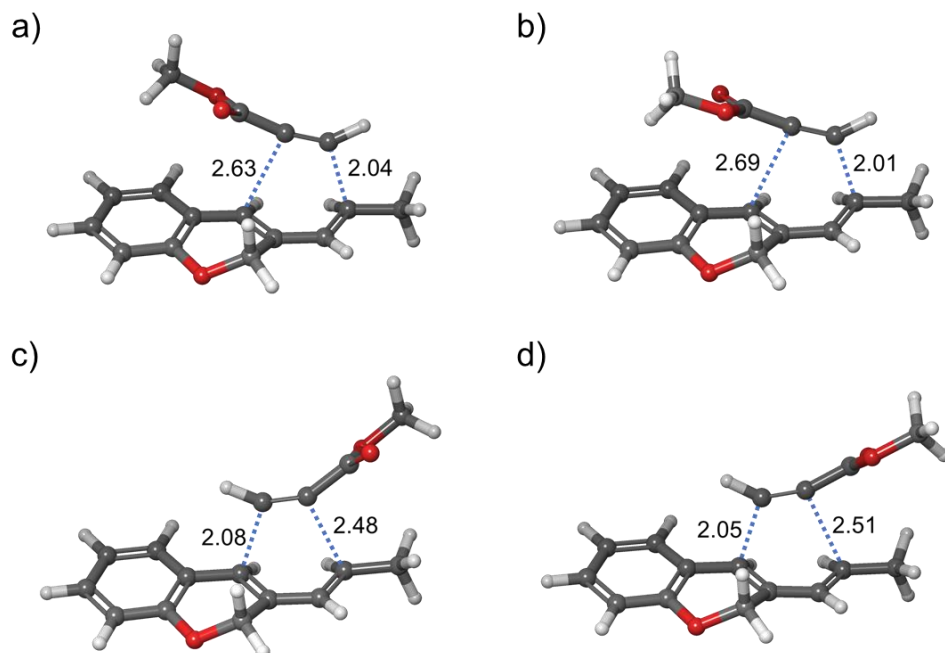

**Figure S6: Balls-and-sticks representations of the found TSs for Reaction 2. Carbons, hydrogens and oxygen atoms are coloured in grey, white and red respectively; Atom distances are shown as dashed lines and reported in Å. a) Ortho-endo TS. b) Ortho-exo TS. c) Meta-endo TS. d) Meta-exo TS.**

**Table S3: M06-2X-D3/6-31+G\*\* ZPE-corrected gas phase energies and relative reaction rates of the located Transition States for Reaction 2.**

| Transition State             | Total Gibbs Free Energy (Hartree) | Relative Energy (kcal/mol) | Relative reaction rate ( $k_{rel}$ ) | Predicted product ratio | Experimental product ratio |
|------------------------------|-----------------------------------|----------------------------|--------------------------------------|-------------------------|----------------------------|
| TS <sub>13</sub> -ortho-endo | -844.317539                       | 1.1897                     | 1.54                                 | 80                      | 87                         |
| TS <sub>13</sub> -ortho-exo  | -844.319435                       | 0.0000                     | 6.43                                 |                         |                            |
| TS <sub>13</sub> -meta-endo  | -844.316971                       | 1.5462                     | 1.00                                 | 20                      | 13                         |
| TS <sub>13</sub> -meta-exo   | -844.316972                       | 1.5455                     | 1.00                                 |                         |                            |

**Table S4: Bond lengths and negative frequencies of the located TSs for Reaction 2.**

| Transition State             | Bond lengths (Å)                        | Negative frequency       |
|------------------------------|-----------------------------------------|--------------------------|
| TS <sub>13</sub> -ortho-endo | $\alpha$ -A = 2.63<br>$\beta$ -B = 2.04 | -471.63 cm <sup>-1</sup> |
| TS <sub>13</sub> -ortho-exo  | $\alpha$ -A = 2.69<br>$\beta$ -B = 2.01 | -475.35cm <sup>-1</sup>  |
| TS <sub>13</sub> -meta-endo  | $\alpha$ -B = 2.48<br>$\beta$ -A = 2.08 | -484.42 cm <sup>-1</sup> |
| TS <sub>13</sub> -meta-exo   | $\alpha$ -B = 2.51<br>$\beta$ -A = 2.05 | -491.69 cm <sup>-1</sup> |

Figure S7: TS<sub>13</sub>-ortho-endo optimized geometry

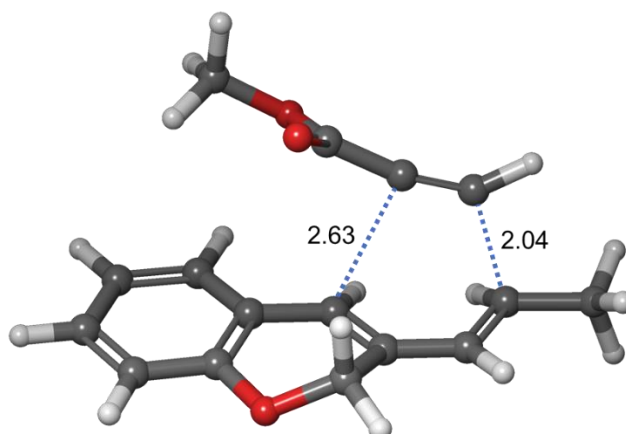

0 1

|   |                  |                  |                  |
|---|------------------|------------------|------------------|
| C | -3.7591806166979 | 3.0301611695148  | -1.6922169025453 |
| C | -3.0770235817827 | 3.7507297391290  | -0.7018324200448 |
| C | -2.1042596336982 | 3.1315414763046  | 0.0839455216974  |
| C | -1.7980833285164 | 1.7878066178677  | -0.1336718958768 |
| C | -2.4774697794267 | 1.0392668714589  | -1.1229881639777 |
| C | -3.4648567299081 | 1.6843183752873  | -1.8897999841694 |
| O | -0.8953795669935 | 1.1914291337439  | 0.6989647215618  |
| C | -0.2112647368973 | 0.0516156720024  | 0.1500254542278  |
| C | -1.1459361692721 | -0.9316241985753 | -0.5210612986758 |
| C | -2.1932487983084 | -0.3772718424288 | -1.2362719893691 |
| C | -0.7716617525937 | -2.2822301873407 | -0.6198431329023 |
| C | -1.3394060836386 | -3.1728858972836 | -1.5381186191963 |
| H | -4.5193511318694 | 3.5165215868484  | -2.2954348808383 |
| H | -3.3048491039463 | 4.8000920664294  | -0.5394395417414 |
| H | -1.5737473655830 | 3.6690052976561  | 0.8627104282915  |
| H | -3.9880921615779 | 1.1098956657599  | -2.6479768823571 |
| H | -2.9370387518205 | -0.9978953950318 | -1.7211448628152 |
| H | -2.3888629957899 | -3.0363183547608 | -1.7888716666138 |
| H | 0.1484900537822  | -2.5874512486153 | -0.1208782556478 |
| H | 0.3201897339025  | -0.4000507679196 | 0.9898129612354  |

|   |                  |                  |                  |
|---|------------------|------------------|------------------|
| H | 0.5254509967101  | 0.4117780236628  | -0.5848902049929 |
| C | -0.7901366765800 | -2.3131696545508 | -3.3084950601286 |
| C | -1.0199712663126 | -1.0982060386972 | -3.4820394422892 |
| C | -1.0537156938914 | 0.2560243039426  | -3.9358252688254 |
| O | -0.1467698875343 | 1.0618992651350  | -3.7809433496600 |
| O | -2.2225094549910 | 0.5570885670334  | -4.5635429846701 |
| C | -2.3076133513744 | 1.8993509901020  | -5.0837481727452 |
| H | -3.3116785804785 | 1.9807756241446  | -5.5010126752807 |
| H | -2.1601361349240 | 2.6303358387541  | -4.2859353563290 |
| H | -1.5547521987414 | 2.0521754193127  | -5.8615932783020 |
| H | -0.3472802303663 | -3.1774927242398 | -3.7758665656434 |
| C | -0.8744485568794 | -4.6099424737203 | -1.6006350352072 |
| H | -1.1324720705621 | -5.0730794416758 | -2.5589174147952 |
| H | 0.2094971243854  | -4.6867941810907 | -1.4638614067306 |
| H | -1.3567976644441 | -5.2030210858750 | -0.8142385506823 |

Zero Point Energy: 177.165 kcal/mol

Total internal energy: -844.257124 Hartrees

Total enthalpy: -844.256180 Hartrees

Total Gibbs free energy: -844.317539 Hartrees

Number of negative frequencies: 1

Frequency: -471.63

Red. Masses: 3.17

Frc. const.: 0.42

IR inten.: 44.66

Figure S8: TS<sub>13</sub>-ortho-exo optimized geometry

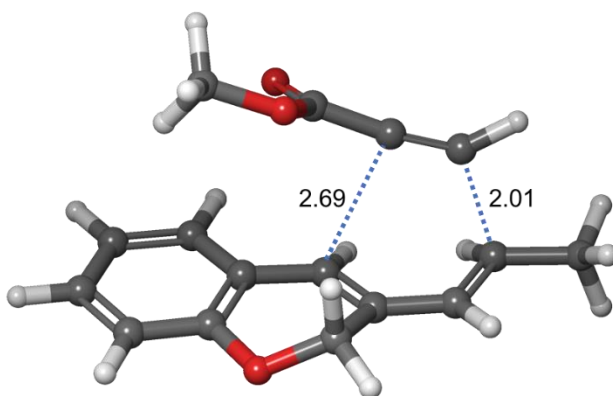

0 1

|   |                   |                   |                   |
|---|-------------------|-------------------|-------------------|
| C | -3.76088900000000 | 3.02911200000000  | -1.68980400000000 |
| C | -3.07783400000000 | 3.75025100000000  | -0.70175800000000 |
| C | -2.10210800000000 | 3.13198700000000  | 0.08413900000000  |
| C | -1.79966200000000 | 1.78840000000000  | -0.13131100000000 |
| C | -2.48161200000000 | 1.03778400000000  | -1.11880300000000 |
| C | -3.46988700000000 | 1.68136100000000  | -1.88762100000000 |
| O | -0.89098600000000 | 1.19224000000000  | 0.69767600000000  |
| C | -0.19532400000000 | 0.06450800000000  | 0.14264000000000  |
| C | -1.10933100000000 | -0.91789100000000 | -0.55868100000000 |
| C | -2.17922700000000 | -0.37252600000000 | -1.24653800000000 |
| C | -0.69174700000000 | -2.25152100000000 | -0.70005700000000 |
| C | -1.23158300000000 | -3.13726700000000 | -1.64315700000000 |
| H | -4.51701800000000 | 3.51534400000000  | -2.29763400000000 |
| H | -3.30591700000000 | 4.79967000000000  | -0.53940500000000 |
| H | -1.57139000000000 | 3.67016800000000  | 0.86241900000000  |
| H | -3.98499000000000 | 1.11445100000000  | -2.65563800000000 |
| H | -2.90592500000000 | -0.99819800000000 | -1.75054300000000 |
| H | -2.28840400000000 | -3.03194100000000 | -1.87802100000000 |
| H | 0.23794100000000  | -2.54155200000000 | -0.20959600000000 |
| H | 0.32567500000000  | -0.39744300000000 | 0.98366300000000  |

|   |                  |                  |                  |
|---|------------------|------------------|------------------|
| H | 0.5533370000000  | 0.4377220000000  | -0.5744180000000 |
| C | -0.7166670000000 | -2.2673320000000 | -3.3783870000000 |
| C | -1.0206050000000 | -1.0715830000000 | -3.5770540000000 |
| C | -1.3085470000000 | 0.2640530000000  | -3.9823650000000 |
| O | -2.3374410000000 | 0.6258780000000  | -4.5398830000000 |
| O | -0.2978000000000 | 1.1123670000000  | -3.6526640000000 |
| C | -0.5183120000000 | 2.4969040000000  | -3.9912160000000 |
| H | 0.3908570000000  | 3.0129440000000  | -3.6823060000000 |
| H | -0.6785800000000 | 2.6078010000000  | -5.0669590000000 |
| H | -1.3848350000000 | 2.8870150000000  | -3.4522430000000 |
| H | -0.2285030000000 | -3.1012860000000 | -3.8572650000000 |
| C | -0.7287970000000 | -4.5623860000000 | -1.7165580000000 |
| H | -0.9831320000000 | -5.0283460000000 | -2.6741780000000 |
| H | 0.3581510000000  | -4.6099940000000 | -1.5900590000000 |
| H | -1.1872430000000 | -5.1700410000000 | -0.9274230000000 |

Zero Point Energy: 177.185 kcal/mol

Total internal energy: -844.259093 Hartrees

Total enthalpy: -844.258149 Hartrees

Total Gibbs free energy: -844.319435 Hartrees

Number of negative frequencies: 1

Frequency: -475.35

Red. Masses: 3.44

Frc. const.: 0.46

IR inten.: 52.21

Figure S9: TS<sub>13</sub>-meta-endo optimized geometry

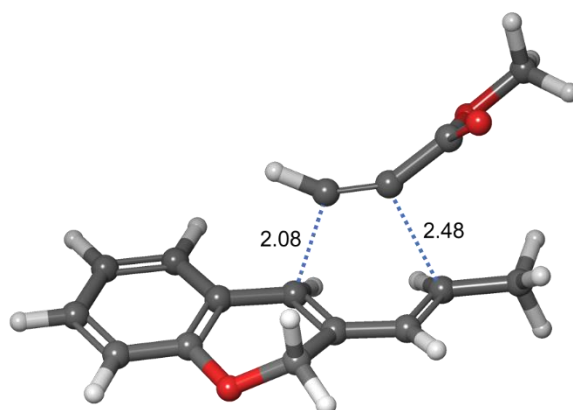

0 1

|   |                 |                 |                 |
|---|-----------------|-----------------|-----------------|
| C | -3.343091000000 | 3.152795000000  | -1.907589000000 |
| C | -3.024920000000 | 3.774378000000  | -0.709057000000 |
| C | -2.326882000000 | 3.091433000000  | 0.269659000000  |
| C | -1.939760000000 | 1.780848000000  | 0.046899000000  |
| C | -2.255036000000 | 1.134390000000  | -1.145935000000 |
| C | -2.961469000000 | 1.840519000000  | -2.114475000000 |
| O | -1.301445000000 | 1.127481000000  | 1.043428000000  |
| C | -0.437352000000 | 0.086637000000  | 0.656271000000  |
| C | -1.077316000000 | -0.858915000000 | -0.329969000000 |
| C | -1.873337000000 | -0.285914000000 | -1.309569000000 |
| C | -0.636783000000 | -2.175881000000 | -0.405513000000 |
| C | -0.954641000000 | -2.997832000000 | -1.459400000000 |
| H | -3.887327000000 | 3.683519000000  | -2.667434000000 |
| H | -3.321048000000 | 4.793480000000  | -0.535584000000 |
| H | -2.079009000000 | 3.552798000000  | 1.207487000000  |
| H | -3.222193000000 | 1.346115000000  | -3.034842000000 |
| H | -2.581399000000 | -0.893271000000 | -1.839563000000 |
| H | -1.873655000000 | -2.837631000000 | -1.988371000000 |
| H | 0.134576000000  | -2.495041000000 | 0.277052000000  |
| H | -0.164841000000 | -0.427186000000 | 1.566255000000  |

|   |                 |                 |                 |
|---|-----------------|-----------------|-----------------|
| H | 0.465156000000  | 0.516946000000  | 0.224874000000  |
| C | -0.376319000000 | -4.381612000000 | -1.592435000000 |
| H | -0.477438000000 | -4.753864000000 | -2.603759000000 |
| H | 0.670715000000  | -4.406223000000 | -1.316689000000 |
| H | -0.917450000000 | -5.065889000000 | -0.942515000000 |
| C | -0.160637000000 | -1.607425000000 | -3.137943000000 |
| C | -0.587236000000 | -0.467259000000 | -2.961208000000 |
| C | 0.655081000000  | -2.524285000000 | -3.910226000000 |
| O | 1.820314000000  | -2.700683000000 | -3.745460000000 |
| O | -0.063090000000 | -3.174224000000 | -4.818974000000 |
| C | 0.643146000000  | -4.076007000000 | -5.653197000000 |
| H | -0.098643000000 | -4.517463000000 | -6.300406000000 |
| H | 1.384065000000  | -3.549160000000 | -6.236926000000 |
| H | 1.132761000000  | -4.838793000000 | -5.065530000000 |
| H | -0.646035000000 | 0.553734000000  | -3.252987000000 |

Zero Point Energy: 177.095 kcal/mol

Total internal energy: -844.256132 Hartrees

Total enthalpy: -844.255188 Hartrees

Total Gibbs free energy: -844.316971 Hartrees

Number of negative frequencies: 1

Frequency: -484.42

Red. Masses: 2.60

Frc. const.: 0.36

IR inten.: 10.94

Figure S10: TS<sub>13</sub>-meta-exo optimized geometry

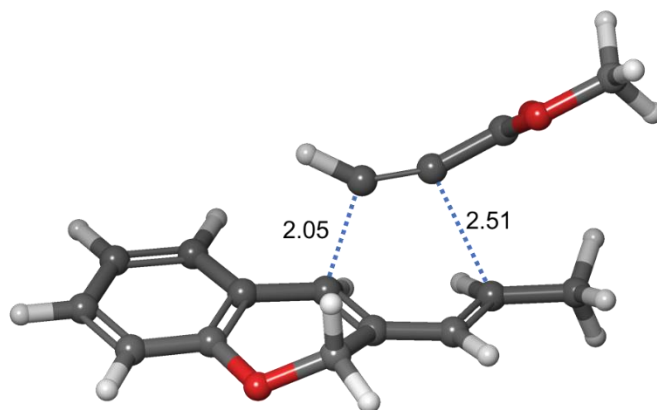

0 1

|   |                  |                  |                  |
|---|------------------|------------------|------------------|
| C | -3.7549496152460 | 3.0327188896168  | -1.6943593848551 |
| C | -3.0799061606308 | 3.7517519742984  | -0.7001932740198 |
| C | -2.1087030793699 | 3.1294038566444  | 0.0838443101857  |
| C | -1.8053338455079 | 1.7831561444475  | -0.1323680086461 |
| C | -2.4849937194851 | 1.0352967461764  | -1.1145756076546 |
| C | -3.4582717604933 | 1.6843834145646  | -1.8901132307020 |
| O | -0.8801794738508 | 1.1987856253979  | 0.6907018084068  |
| C | -0.2088147643944 | 0.0569769479387  | 0.1375691280478  |
| C | -1.1586591804673 | -0.9427167085925 | -0.4715202968976 |
| C | -2.2023785860336 | -0.4086026990026 | -1.2447781034908 |
| C | -0.8043774376793 | -2.3000094085733 | -0.5138929212414 |
| C | -1.4503737136642 | -3.2365025877279 | -1.2964507908515 |
| H | -4.5107407494324 | 3.5179472142052  | -2.3038115024684 |
| H | -3.3082209927083 | 4.8006745448527  | -0.5364562902889 |
| H | -1.5765814761523 | 3.6646017222471  | 0.8632698650743  |
| H | -3.9944121271231 | 1.1120478675489  | -2.6436786850318 |
| H | -3.0708112251830 | -1.0281711912903 | -1.4493091956731 |
| H | -2.4635143977070 | -3.0450322812717 | -1.6363268394866 |
| H | 0.1256792104369  | -2.5956387821910 | -0.0281798109444 |
| H | 0.3598427302739  | -0.3784522463093 | 0.9616269494530  |



|   |                  |                  |                  |
|---|------------------|------------------|------------------|
| H | 0.5028372881723  | 0.4096475461594  | -0.6282768736923 |
| C | -0.9894996728139 | -4.6563164571386 | -1.4239854729906 |
| H | -1.1559254356202 | -5.0357971054496 | -2.4374870933040 |
| H | 0.0687887508906  | -4.7661435835377 | -1.1695749833228 |
| H | -1.5735177345099 | -5.3002183296145 | -0.7518991065853 |
| C | -1.1606312610683 | -1.9301287526645 | -3.4152646514668 |
| C | -1.5194397018336 | -0.7626908046701 | -3.1484221193746 |
| C | -0.7377939725667 | -3.0870779731546 | -4.1410603386694 |
| O | -1.4863587433592 | -3.9182191447664 | -4.6364194200811 |
| O | 0.6170610977679  | -3.1876335363275 | -4.1825059002022 |
| C | 1.1259715339479  | -4.3361663800906 | -4.8873738868737 |
| H | 0.8033356921631  | -4.3201724759080 | -5.9317379104391 |
| H | 2.2109902607517  | -4.2575089586677 | -4.8181648459302 |
| H | 0.7753248280180  | -5.2609386828792 | -4.4210805363993 |
| H | -1.6548725654586 | 0.2288813878757  | -3.5462795348970 |

Zero Point Energy: 177.202 kcal/mol

Total internal energy: -844.256522 Hartrees

Total enthalpy: -844.255578 Hartrees

Total Gibbs free energy: -844.316972 Hartrees

Number of negative frequencies: 1

Frequency: -491.69

Red. Masses: 2.70

Frc. const.: 0.38

IR inten.: 13.17

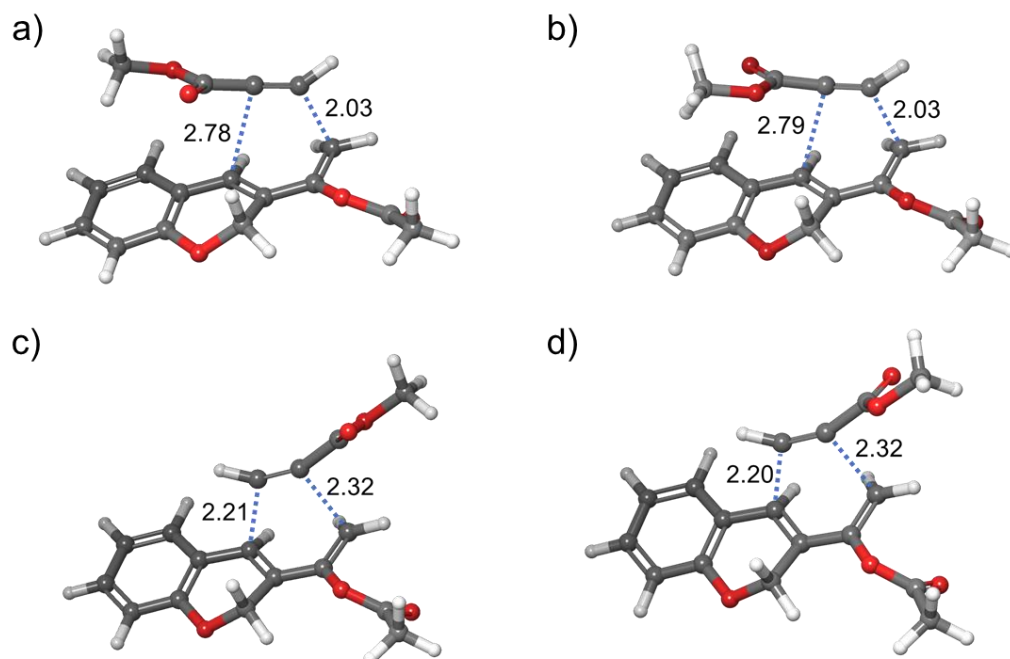

**Figure S11:** Balls-and-sticks representations of the found TSs for Reaction 3. Carbons, hydrogens and oxygen atoms are coloured in grey, white and red respectively; Atom distances are shown as dashed lines and reported in Å. a) Ortho-endo TS. b) Ortho-exo TS. c) Meta-endo TS. d) Meta-exo TS.

**Table S5:** M06-2X-D3/6-31+G\*\* ZPE-corrected gas phase energies and relative reaction rate of the located Transition States (TSs) for Reaction 3.

| Transition State             | Total Gibbs Free Energy (Hartree) | Relative Energy (kcal/mol) | Relative reaction rate ( $k_{rel}$ ) | Predicted product ratio | Experimental product ratio |
|------------------------------|-----------------------------------|----------------------------|--------------------------------------|-------------------------|----------------------------|
| TS <sub>15</sub> -ortho-endo | -1032.810080                      | 1.3899                     | 19.03                                | 98                      | 100                        |
| TS <sub>15</sub> -ortho-exo  | -1032.812295                      | 0.0000                     | 101.35                               |                         |                            |
| TS <sub>15</sub> -meta-endo  | -1032.806602                      | 3.5724                     | 1.38                                 | 2                       | Not detected               |
| TS <sub>15</sub> -meta-exo   | -1032.806179                      | 3.8378                     | 1.00                                 |                         |                            |

**Table S6:** Bond lengths and negative frequencies of the located TSs for Reaction 3.

| Transition State             | Bond lengths (Å)                        | Negative frequency       |
|------------------------------|-----------------------------------------|--------------------------|
| TS <sub>15</sub> -ortho-endo | $\alpha$ -A = 2.03<br>$\beta$ -B = 2.78 | -444.03 cm <sup>-1</sup> |
| TS <sub>15</sub> -ortho-exo  | $\alpha$ -A = 2.03<br>$\beta$ -B = 2.79 | -438.18 cm <sup>-1</sup> |
| TS <sub>15</sub> -meta-endo  | $\alpha$ -B = 2.32<br>$\beta$ -A = 2.21 | -481.22 cm <sup>-1</sup> |

|                            |                                         |                          |
|----------------------------|-----------------------------------------|--------------------------|
| TS <sub>15</sub> -meta-exo | $\alpha$ -B = 2.32<br>$\beta$ -A = 2.20 | -483.62 cm <sup>-1</sup> |
|----------------------------|-----------------------------------------|--------------------------|

**Figure S12: TS<sub>15</sub>-ortho-endo optimized geometry**

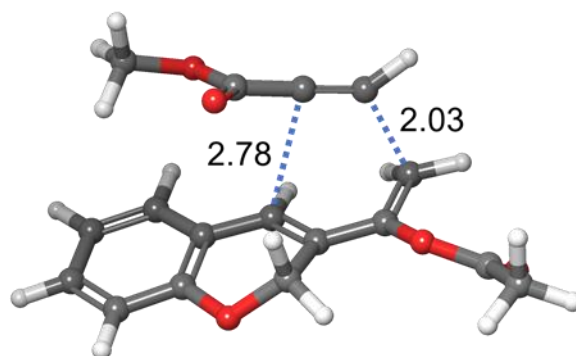

0 1

|   |                 |                 |                 |
|---|-----------------|-----------------|-----------------|
| C | -3.704385000000 | 3.064913000000  | -1.795807000000 |
| C | -2.964420000000 | 3.777774000000  | -0.840949000000 |
| C | -2.064854000000 | 3.120756000000  | -0.000788000000 |
| C | -1.892247000000 | 1.741754000000  | -0.125735000000 |
| C | -2.634839000000 | 1.001688000000  | -1.074701000000 |
| C | -3.543322000000 | 1.687423000000  | -1.902576000000 |
| O | -1.061858000000 | 1.114835000000  | 0.753711000000  |
| C | -0.494204000000 | -0.132844000000 | 0.316280000000  |
| C | -1.515107000000 | -1.044303000000 | -0.333014000000 |
| C | -2.490031000000 | -0.435270000000 | -1.093255000000 |
| C | -1.308422000000 | -2.441531000000 | -0.365393000000 |
| C | -1.961893000000 | -3.297936000000 | -1.247853000000 |
| H | -4.402894000000 | 3.584383000000  | -2.444021000000 |
| H | -3.089276000000 | 4.852801000000  | -0.750676000000 |
| H | -1.491185000000 | 3.654548000000  | 0.749205000000  |
| H | -4.107909000000 | 1.119587000000  | -2.635896000000 |
| H | -3.249924000000 | -1.008045000000 | -1.609790000000 |
| H | -1.709201000000 | -4.350769000000 | -1.214535000000 |

|   |                 |                 |                 |
|---|-----------------|-----------------|-----------------|
| H | -2.998934000000 | -3.094934000000 | -1.486633000000 |
| H | -0.055022000000 | -0.577104000000 | 1.207691000000  |
| H | 0.306102000000  | 0.079603000000  | -0.409325000000 |
| O | -0.131289000000 | -2.853309000000 | 0.266540000000  |
| C | 1.289066000000  | -4.192937000000 | 1.585551000000  |
| C | -0.095637000000 | -4.001134000000 | 1.026549000000  |
| O | -1.046084000000 | -4.722560000000 | 1.206684000000  |
| H | 1.319063000000  | -5.113719000000 | 2.167154000000  |
| H | 2.017480000000  | -4.234181000000 | 0.770181000000  |
| H | 1.554827000000  | -3.340552000000 | 2.218440000000  |
| C | -1.258926000000 | -2.710230000000 | -3.055777000000 |
| C | -1.256090000000 | -1.497646000000 | -3.350757000000 |
| C | -1.015805000000 | -0.131257000000 | -3.672045000000 |
| O | 0.005483000000  | 0.475158000000  | -3.371149000000 |
| O | -2.038948000000 | 0.431674000000  | -4.370164000000 |
| C | -1.812801000000 | 1.792462000000  | -4.790315000000 |
| H | -2.730995000000 | 2.091462000000  | -5.296415000000 |
| H | -1.622139000000 | 2.435981000000  | -3.929158000000 |
| H | -0.962709000000 | 1.840010000000  | -5.476251000000 |
| H | -0.966946000000 | -3.673081000000 | -3.440220000000 |

Zero Point Energy: 186.141 kcal/mol

Total internal energy: -1032.743181 Hartrees

Total enthalpy: -1032.742236 Hartrees

Total Gibbs free energy: -1032.810080 Hartrees

Number of negative frequencies: 1

Frequency: -444.03

Red. Masses: 3.99

Frc. const.: 0.46

IR inten.: 74.99

Figure S13: TS<sub>15</sub>-ortho-exo optimized geometry

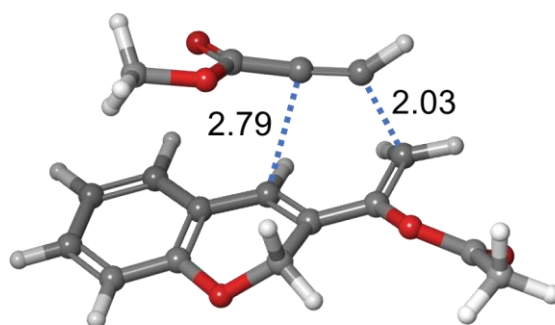

0 1

|   |                  |                  |                  |
|---|------------------|------------------|------------------|
| C | -1.3095730000000 | -2.6935420000000 | -3.0949100000000 |
| C | -1.4175410000000 | -1.4897880000000 | -3.4004230000000 |
| C | -1.5167580000000 | -0.1418900000000 | -3.8476850000000 |
| O | -2.4750290000000 | 0.3326430000000  | -4.4455580000000 |
| O | -0.4087430000000 | 0.5766690000000  | -3.5204800000000 |
| C | -0.4319800000000 | 1.9622720000000  | -3.9208570000000 |
| H | 0.5288440000000  | 2.3662050000000  | -3.6015500000000 |
| H | -0.5444480000000 | 2.0464130000000  | -5.0051010000000 |
| H | -1.2536350000000 | 2.4878390000000  | -3.4287230000000 |
| H | -0.9663680000000 | -3.6420070000000 | -3.4714730000000 |
| C | -3.6779930000000 | 3.0714100000000  | -1.8315570000000 |
| C | -2.9345240000000 | 3.7838160000000  | -0.8814550000000 |
| C | -2.0608580000000 | 3.1203290000000  | -0.0160440000000 |
| C | -1.9228740000000 | 1.7369730000000  | -0.1138970000000 |
| C | -2.6699650000000 | 0.9964420000000  | -1.0593380000000 |
| C | -3.5517990000000 | 1.6868240000000  | -1.9120660000000 |
| O | -1.1167990000000 | 1.1034650000000  | 0.7882610000000  |
| C | -0.5482070000000 | -0.1467720000000 | 0.3685740000000  |
| C | -1.5492280000000 | -1.0513250000000 | -0.3209410000000 |
| C | -2.5311510000000 | -0.4425020000000 | -1.0721180000000 |

|   |                  |                  |                  |
|---|------------------|------------------|------------------|
| C | -1.3094860000000 | -2.4420250000000 | -0.3837370000000 |
| C | -1.9512840000000 | -3.3048580000000 | -1.2666060000000 |
| H | -4.3519280000000 | 3.5940360000000  | -2.5024210000000 |
| H | -3.0351330000000 | 4.8629710000000  | -0.8115850000000 |
| H | -1.4860580000000 | 3.6535820000000  | 0.7336430000000  |
| H | -4.1120480000000 | 1.1247440000000  | -2.6513740000000 |
| H | -3.2902960000000 | -1.0161110000000 | -1.5890080000000 |
| H | -1.6712780000000 | -4.3511660000000 | -1.2449560000000 |
| H | -2.9955660000000 | -3.1259610000000 | -1.4925250000000 |
| H | -0.1492750000000 | -0.5997690000000 | 1.2749570000000  |
| H | 0.2893180000000  | 0.0564340000000  | -0.3172360000000 |
| O | -0.1155930000000 | -2.8357240000000 | 0.2318970000000  |
| C | 1.3398060000000  | -4.1520690000000 | 1.5378300000000  |
| C | -0.0539220000000 | -3.9816530000000 | 0.9942680000000  |
| O | -0.9911740000000 | -4.7165350000000 | 1.1870860000000  |
| H | 1.3883540000000  | -5.0685090000000 | 2.1250300000000  |
| H | 2.0589980000000  | -4.1904420000000 | 0.7141470000000  |
| H | 1.6025840000000  | -3.2923390000000 | 2.1619580000000  |

Zero Point Energy: 186.170 kcal/mol

Total internal energy: -1032.745458 Hartrees

Total enthalpy: -1032.744514 Hartrees

Total Gibbs free energy: -1032.812295 Hartrees

Number of negative frequencies: 1

Frequency: -438.18

Red. Masses: 3.97

Frc. const.: 0.45

IR inten.: 69.06

Figure S14: TS<sub>15</sub>-meta-endo optimized geometry

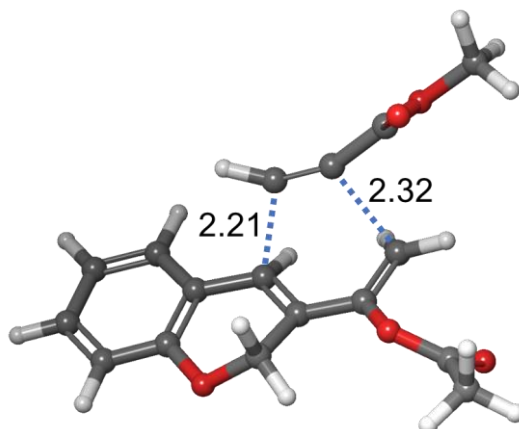

0 1

|   |                  |                  |                  |
|---|------------------|------------------|------------------|
| C | -1.2824710000000 | -1.8122180000000 | -3.6828870000000 |
| C | -1.5976520000000 | -0.6376140000000 | -3.4127550000000 |
| C | -0.7588970000000 | -2.8857390000000 | -4.4998850000000 |
| O | 0.4159290000000  | -3.0381730000000 | -4.7802020000000 |
| O | -1.7444920000000 | -3.7277080000000 | -4.8975610000000 |
| C | -1.3161590000000 | -4.8503870000000 | -5.6948970000000 |
| H | -2.2258790000000 | -5.4070750000000 | -5.9189280000000 |
| H | -0.8356680000000 | -4.5065370000000 | -6.6143330000000 |
| H | -0.6116790000000 | -5.4701970000000 | -5.1332960000000 |
| H | -1.7419040000000 | 0.3892140000000  | -3.6896140000000 |
| C | -3.8444950000000 | 3.0631130000000  | -1.4990170000000 |
| C | -3.1418820000000 | 3.7030820000000  | -0.4699360000000 |
| C | -2.1587160000000 | 3.0201500000000  | 0.2461640000000  |
| C | -1.8696600000000 | 1.6921340000000  | -0.0748050000000 |
| C | -2.5760700000000 | 1.0236300000000  | -1.0953190000000 |
| C | -3.5634140000000 | 1.7315500000000  | -1.7994310000000 |
| O | -0.9418880000000 | 1.0378840000000  | 0.6869730000000  |
| C | -0.2790240000000 | -0.0687450000000 | 0.0572110000000  |
| C | -1.2382650000000 | -0.9935270000000 | -0.6540050000000 |
| C | -2.3008840000000 | -0.3973780000000 | -1.3326440000000 |

|   |                 |                 |                 |
|---|-----------------|-----------------|-----------------|
| C | -0.889496000000 | -2.334453000000 | -0.891592000000 |
| C | -1.536021000000 | -3.139329000000 | -1.802328000000 |
| H | -4.609546000000 | 3.596913000000  | -2.053661000000 |
| H | -3.359102000000 | 4.738477000000  | -0.225118000000 |
| H | -1.608090000000 | 3.493576000000  | 1.052227000000  |
| H | -4.118760000000 | 1.218242000000  | -2.581000000000 |
| H | -3.142377000000 | -0.996642000000 | -1.660489000000 |
| H | -1.123308000000 | -4.108515000000 | -2.050187000000 |
| H | -2.590197000000 | -3.010203000000 | -2.002798000000 |
| H | 0.256971000000  | -0.581656000000 | 0.854260000000  |
| H | 0.461525000000  | 0.323169000000  | -0.659381000000 |
| O | 0.377621000000  | -2.700935000000 | -0.409227000000 |
| C | 1.989261000000  | -4.062327000000 | 0.639814000000  |
| C | 0.551154000000  | -3.911867000000 | 0.218996000000  |
| O | -0.331317000000 | -4.717475000000 | 0.392915000000  |
| H | 2.116668000000  | -5.012546000000 | 1.157443000000  |
| H | 2.635656000000  | -4.023060000000 | -0.242445000000 |
| H | 2.277414000000  | -3.234140000000 | 1.294231000000  |

Zero Point Energy: 186.120 kcal/mol

Total internal energy: -1032.739691 Hartrees

Total enthalpy: -1032.738747 Hartrees

Total Gibbs free energy: -1032.806602 Hartrees

Number of negative frequencies: 1

Frequency: -481.22

Red. Masses: 2.43

Frc. const.: 0.33

IR inten.: 2.99



Figure S15: TS<sub>15</sub>-meta-exo optimized geometry

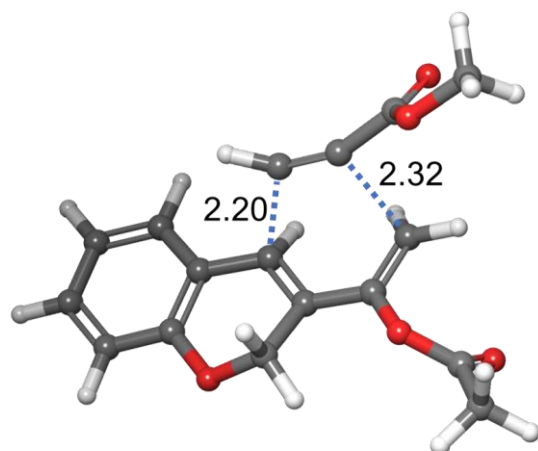

0 1

|   |                 |                 |                 |
|---|-----------------|-----------------|-----------------|
| C | -3.707195000000 | 3.054116000000  | -1.805193000000 |
| C | -3.077253000000 | 3.742991000000  | -0.760397000000 |
| C | -2.222254000000 | 3.072638000000  | 0.114564000000  |
| C | -1.987910000000 | 1.707204000000  | -0.061823000000 |
| C | -2.626032000000 | 0.990412000000  | -1.094443000000 |
| C | -3.484129000000 | 1.687034000000  | -1.960761000000 |
| O | -1.190180000000 | 1.072956000000  | 0.850144000000  |
| C | -0.541167000000 | -0.122921000000 | 0.392800000000  |
| C | -1.481847000000 | -1.051891000000 | -0.337284000000 |
| C | -2.425940000000 | -0.460817000000 | -1.177302000000 |
| C | -1.206948000000 | -2.427265000000 | -0.414626000000 |
| C | -1.815908000000 | -3.280807000000 | -1.305776000000 |
| H | -4.372327000000 | 3.578315000000  | -2.483929000000 |
| H | -3.251508000000 | 4.806494000000  | -0.626860000000 |
| H | -1.730766000000 | 3.584435000000  | 0.935347000000  |
| H | -3.986300000000 | 1.137549000000  | -2.753648000000 |
| H | -3.273368000000 | -1.036650000000 | -1.531612000000 |
| H | -1.447432000000 | -4.292716000000 | -1.417592000000 |
| H | -2.834543000000 | -3.114324000000 | -1.627689000000 |

|   |                 |                 |                 |
|---|-----------------|-----------------|-----------------|
| H | -0.127238000000 | -0.590847000000 | 1.284970000000  |
| H | 0.294965000000  | 0.158881000000  | -0.268398000000 |
| O | -0.020669000000 | -2.826338000000 | 0.227379000000  |
| C | 1.338916000000  | -4.155732000000 | 1.622757000000  |
| C | -0.034975000000 | -3.929985000000 | 1.048647000000  |
| O | -1.015447000000 | -4.600055000000 | 1.262900000000  |
| H | 1.319899000000  | -5.032433000000 | 2.269781000000  |
| H | 2.060166000000  | -4.298569000000 | 0.812219000000  |
| H | 1.654932000000  | -3.275606000000 | 2.191273000000  |
| C | -1.315512000000 | -2.161013000000 | -3.275600000000 |
| C | -1.563104000000 | -0.947421000000 | -3.141456000000 |
| C | -0.981308000000 | -3.379857000000 | -3.979177000000 |
| O | -1.798028000000 | -4.140959000000 | -4.467501000000 |
| O | 0.355329000000  | -3.591332000000 | -4.005218000000 |
| C | 0.771048000000  | -4.807849000000 | -4.660204000000 |
| H | 1.858223000000  | -4.813068000000 | -4.591410000000 |
| H | 0.345810000000  | -5.678379000000 | -4.153336000000 |
| H | 0.447848000000  | -4.810885000000 | -5.703967000000 |
| H | -1.607039000000 | 0.052485000000  | -3.529201000000 |

Zero Point Energy: 186.121 kcal/mol

Total internal energy: -1032.739305 Hartrees

Total enthalpy: -1032.738361 Hartrees

Total Gibbs free energy: -1032.806179 Hartrees

Number of negative frequencies: 1

Frequency: -483.62

Red. Masses: 2.43

Frc. const.: 0.33

IR inten.: 3.68

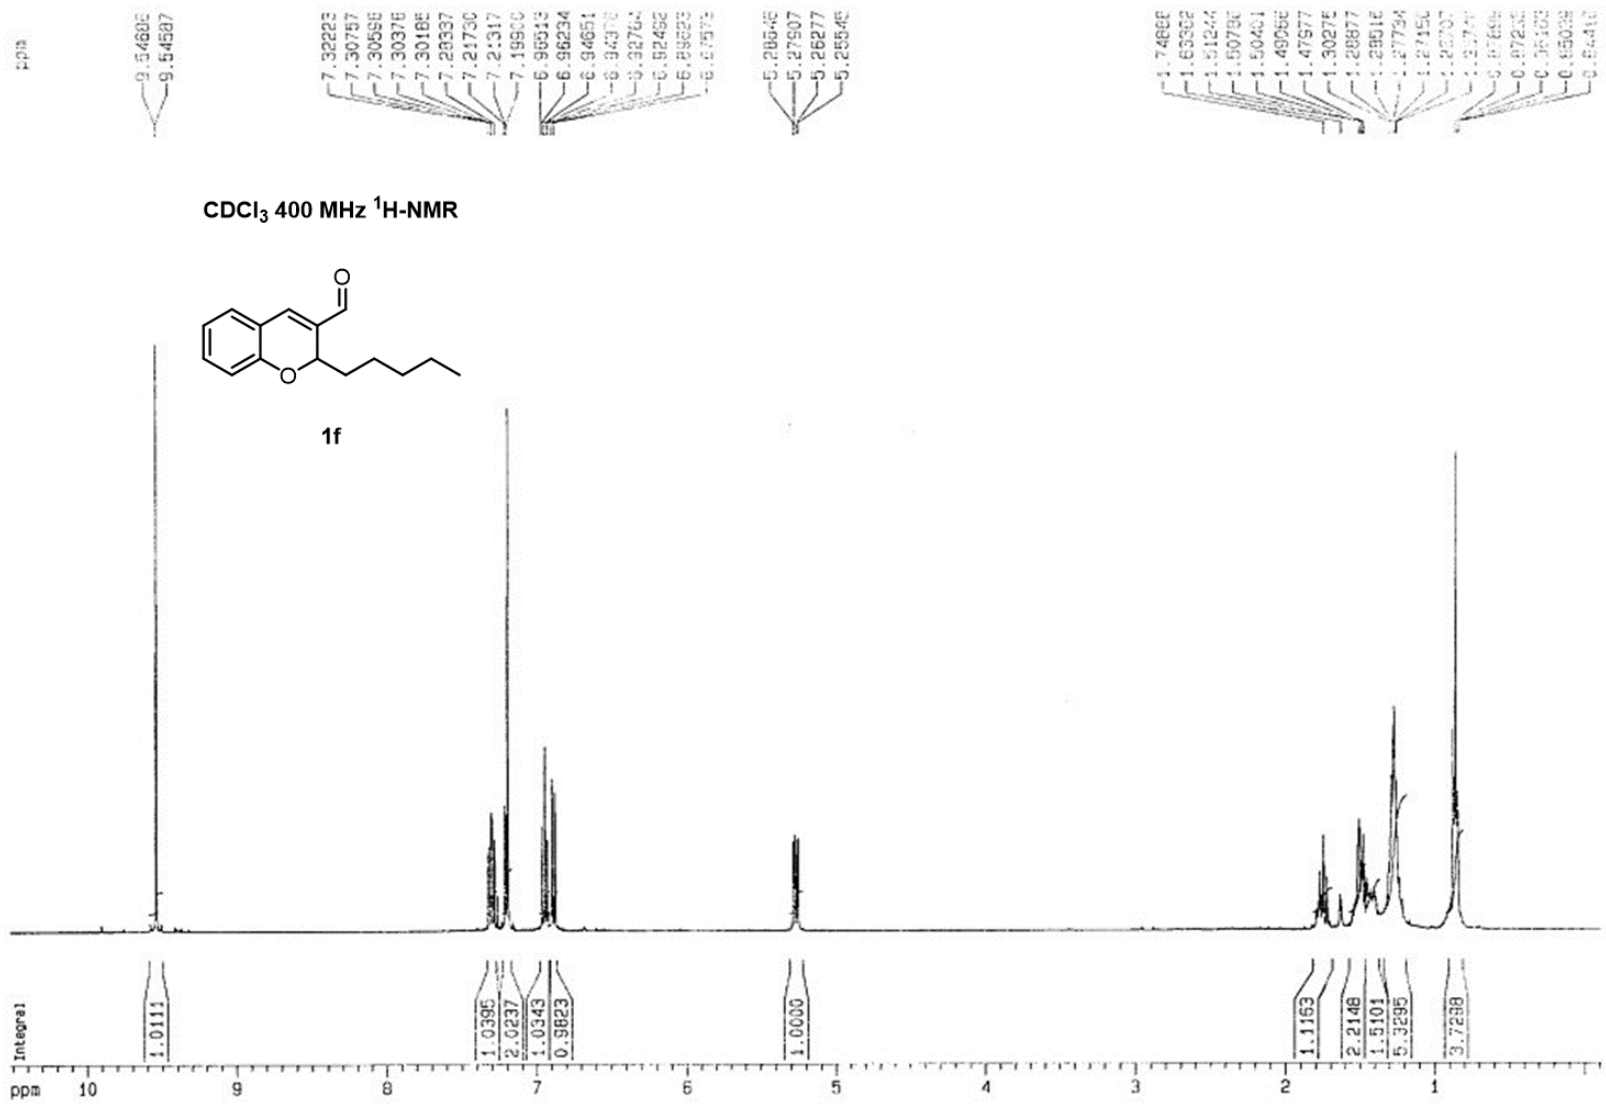

ppm

190.018

154.925

140.442

138.517

133.219

129.051

121.426

120.273

117.121

77.230

76.913

76.595

73.249

33.527

31.235

24.564

22.385

13.858

CDCl<sub>3</sub> 101 MHz <sup>13</sup>C-NMR

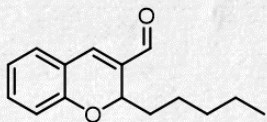

1f

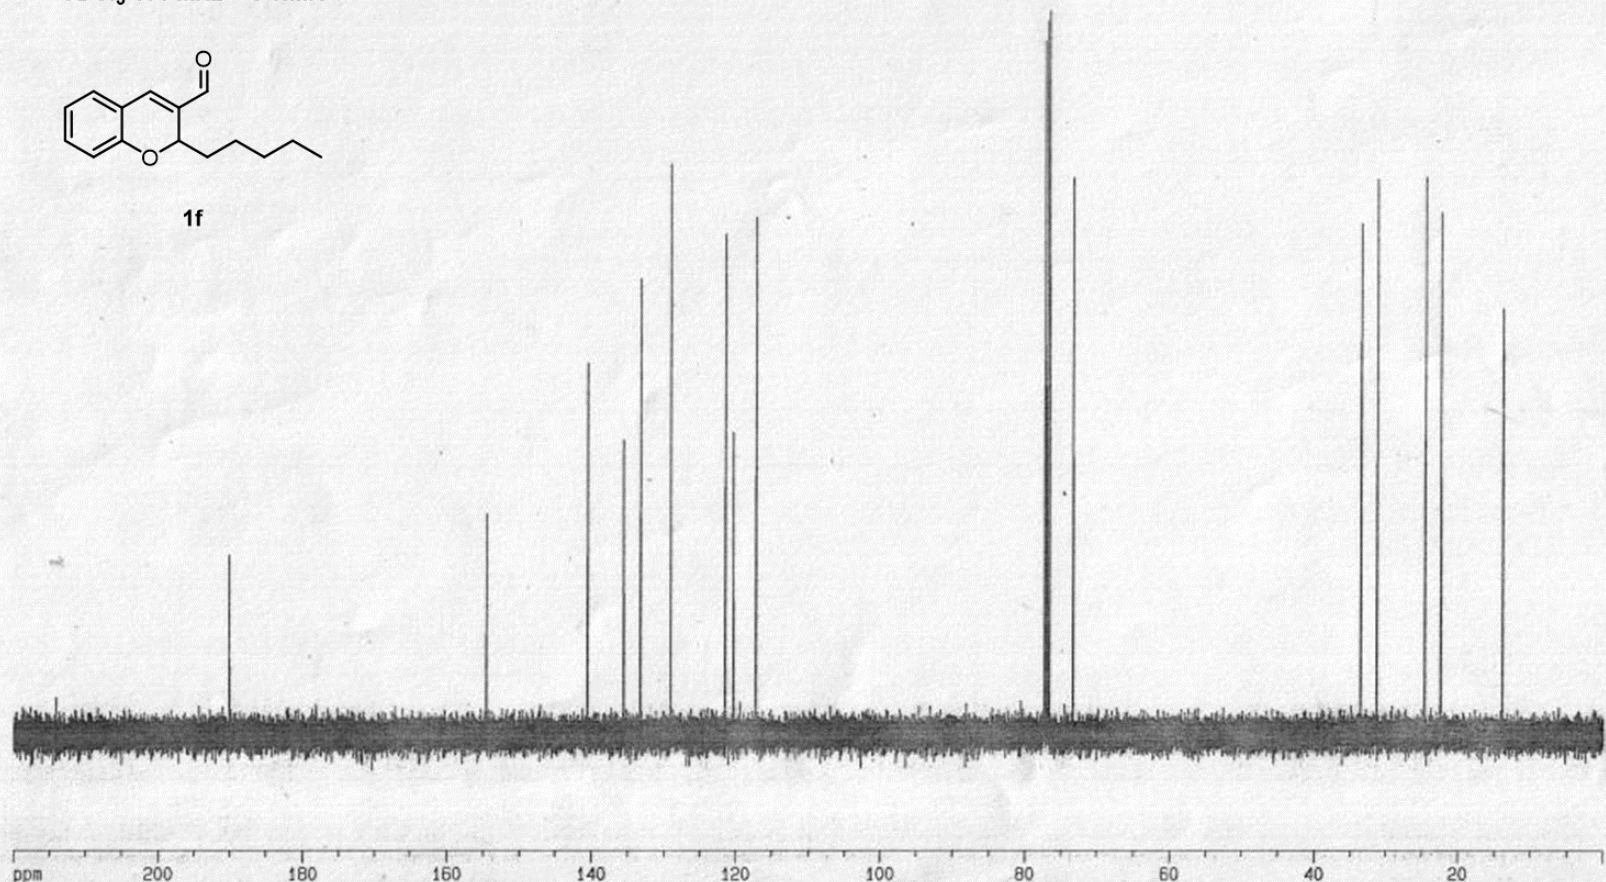

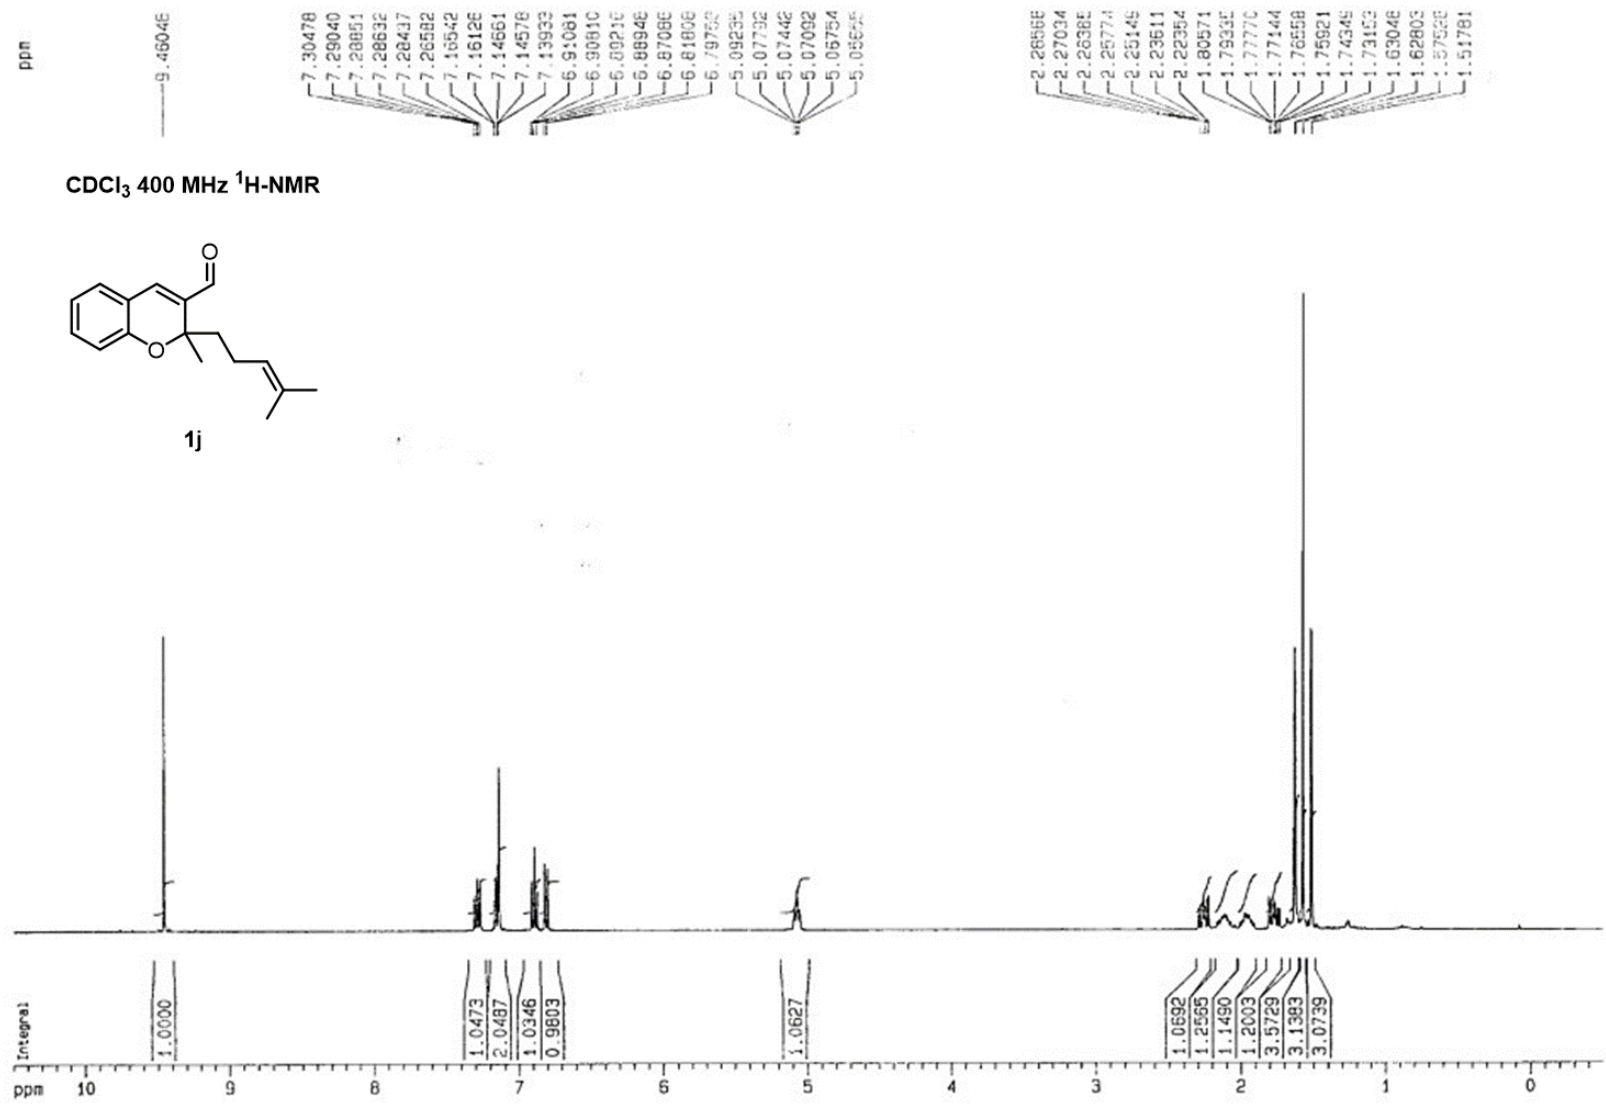

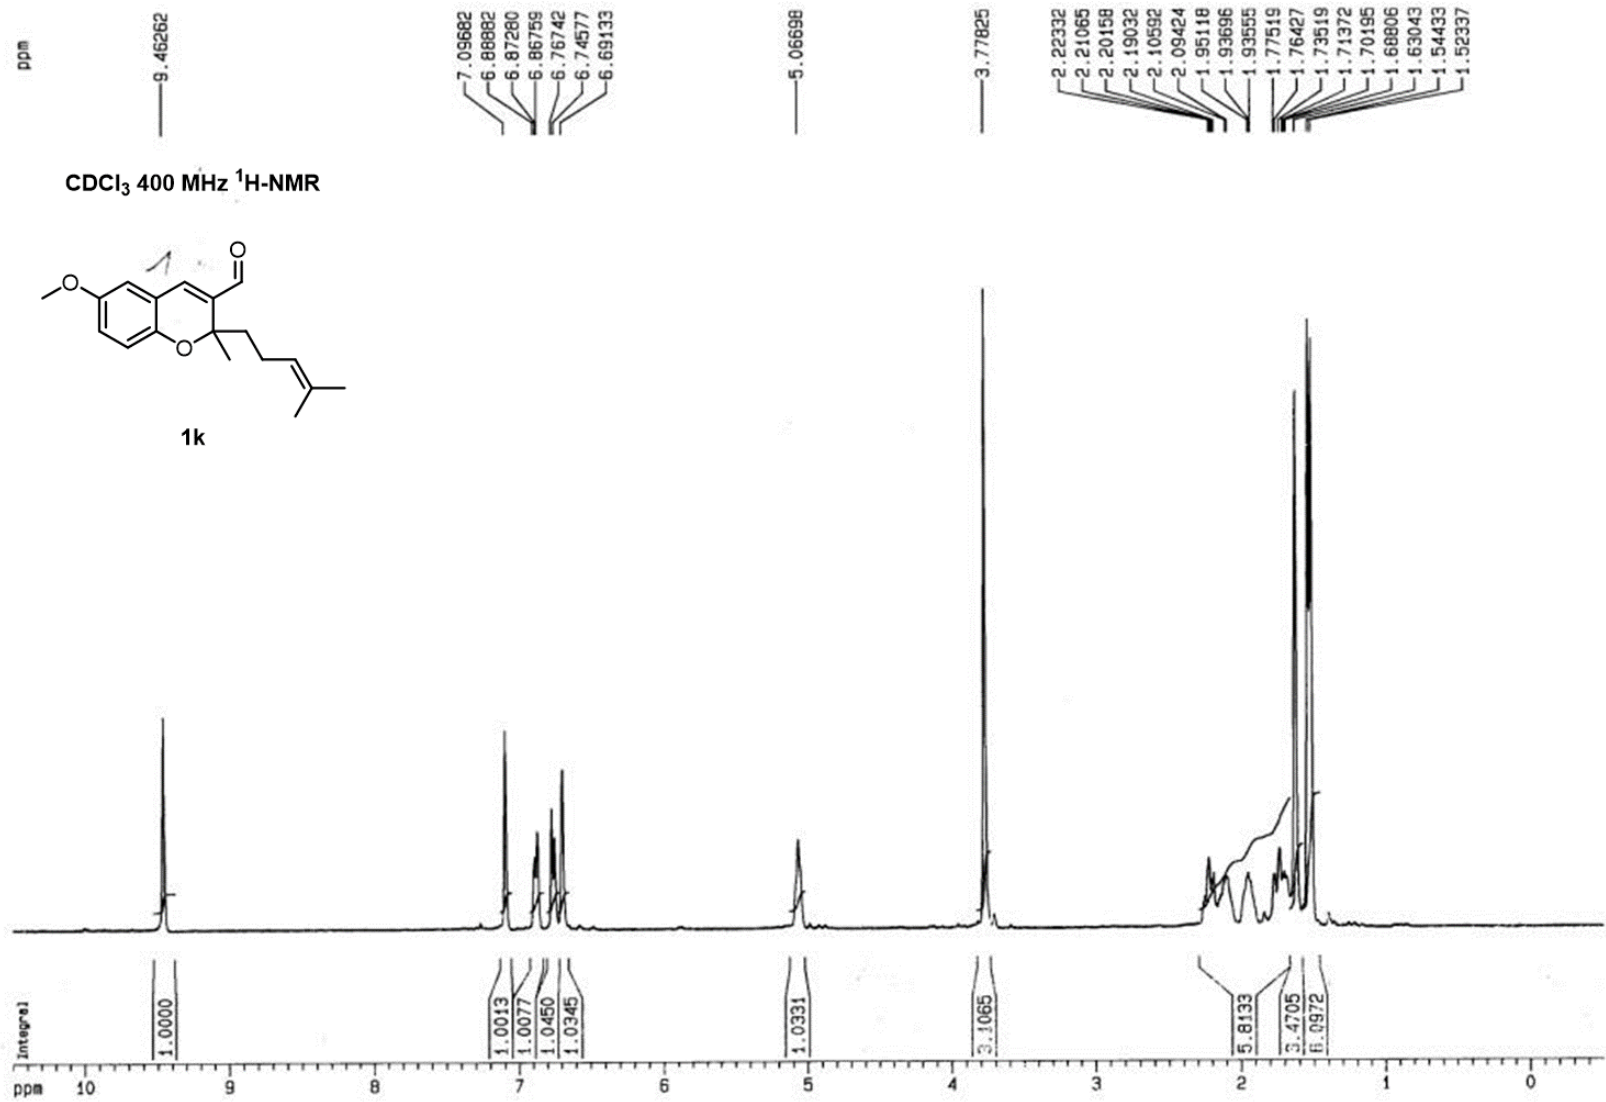

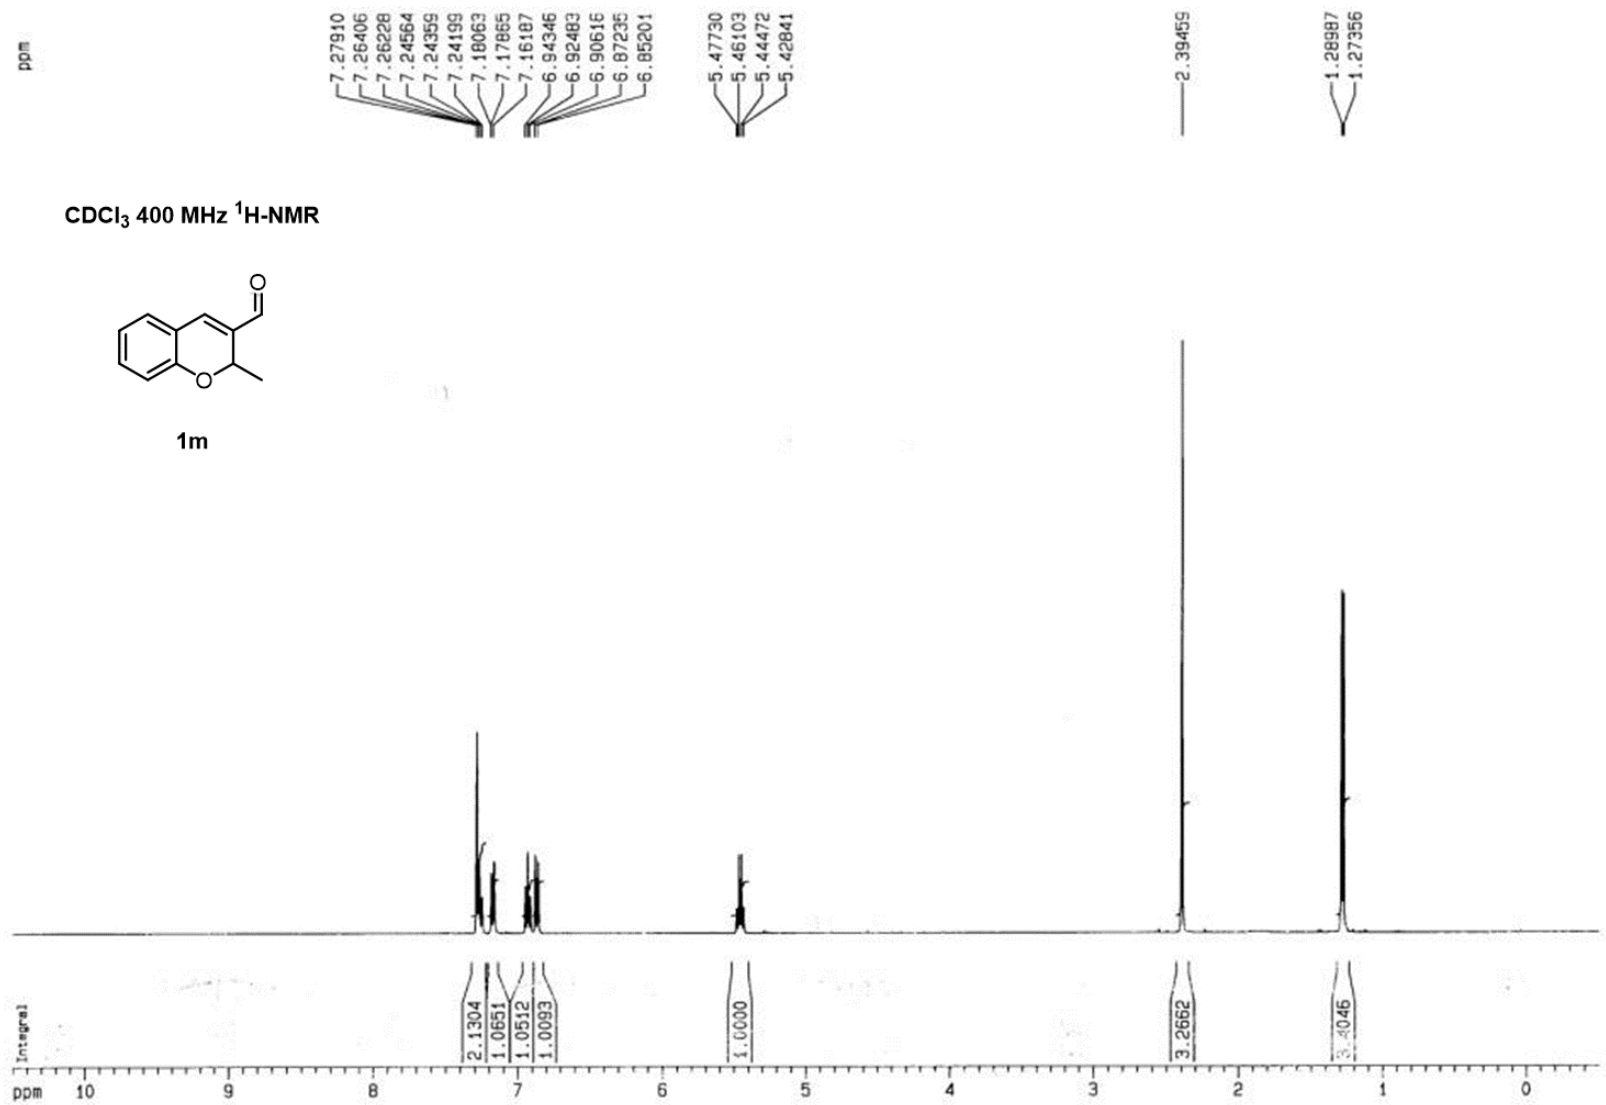

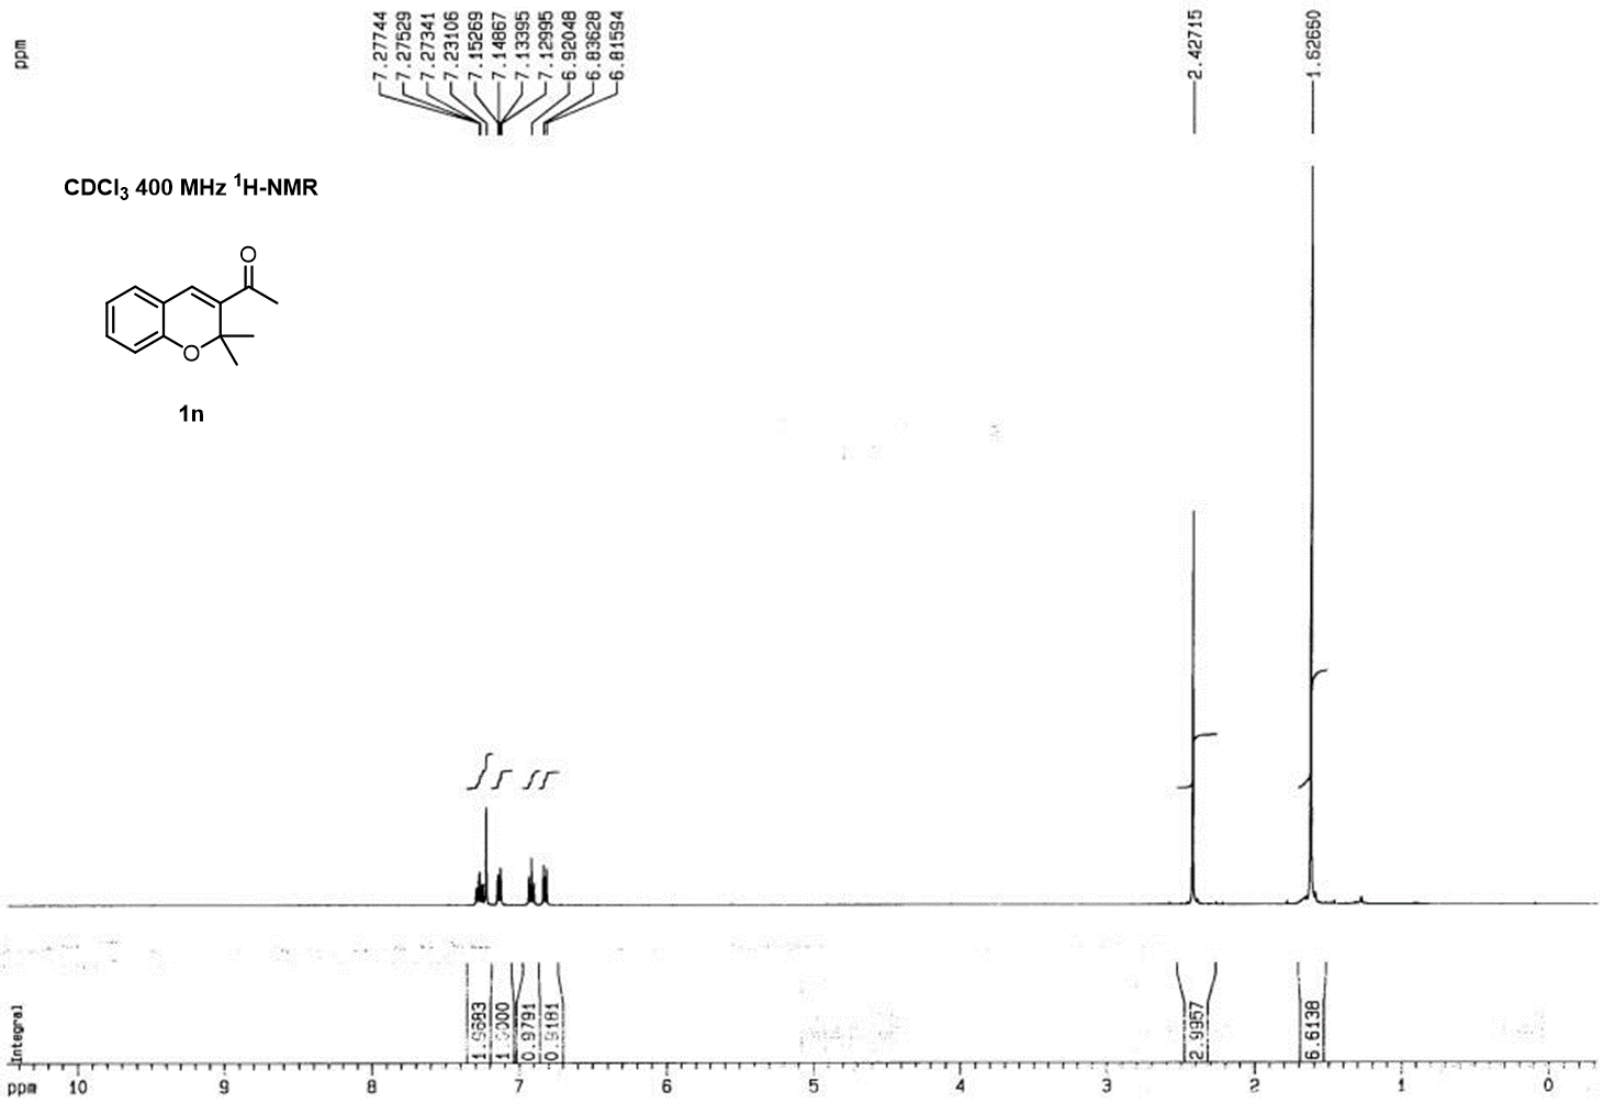



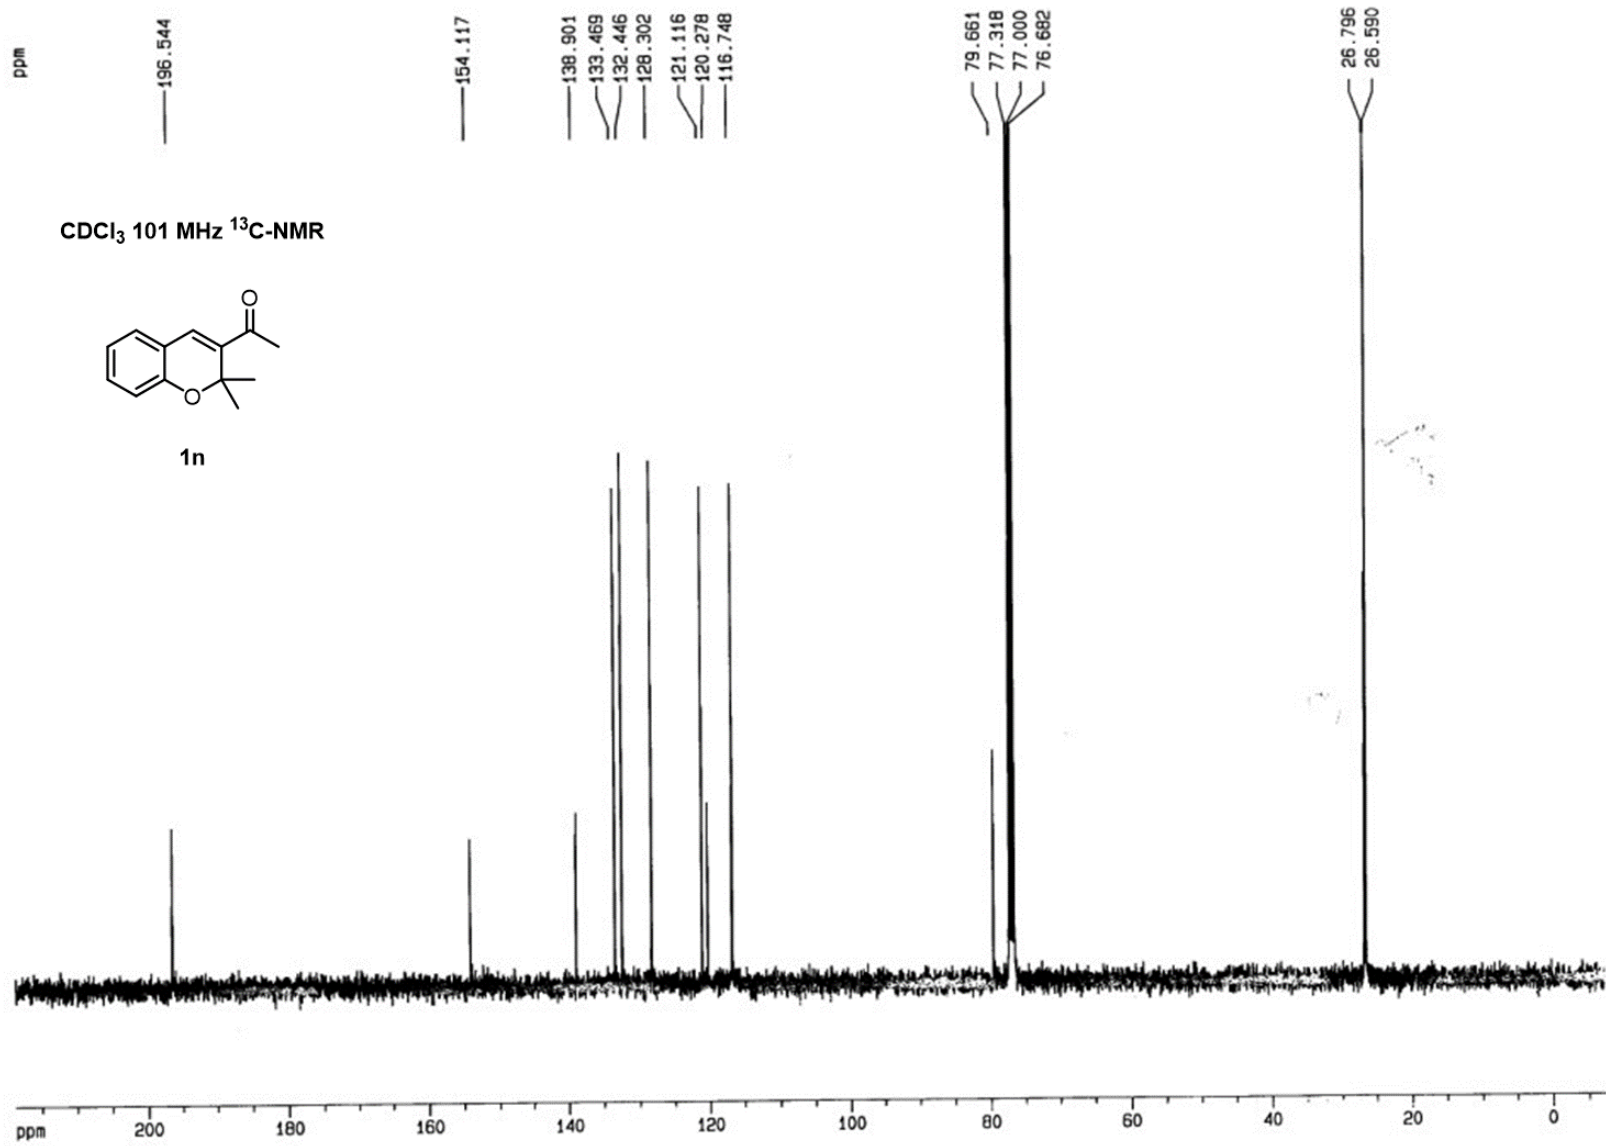

ppm

CDCl<sub>3</sub> 400 MHz <sup>1</sup>H-NMR

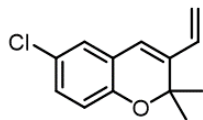

2b

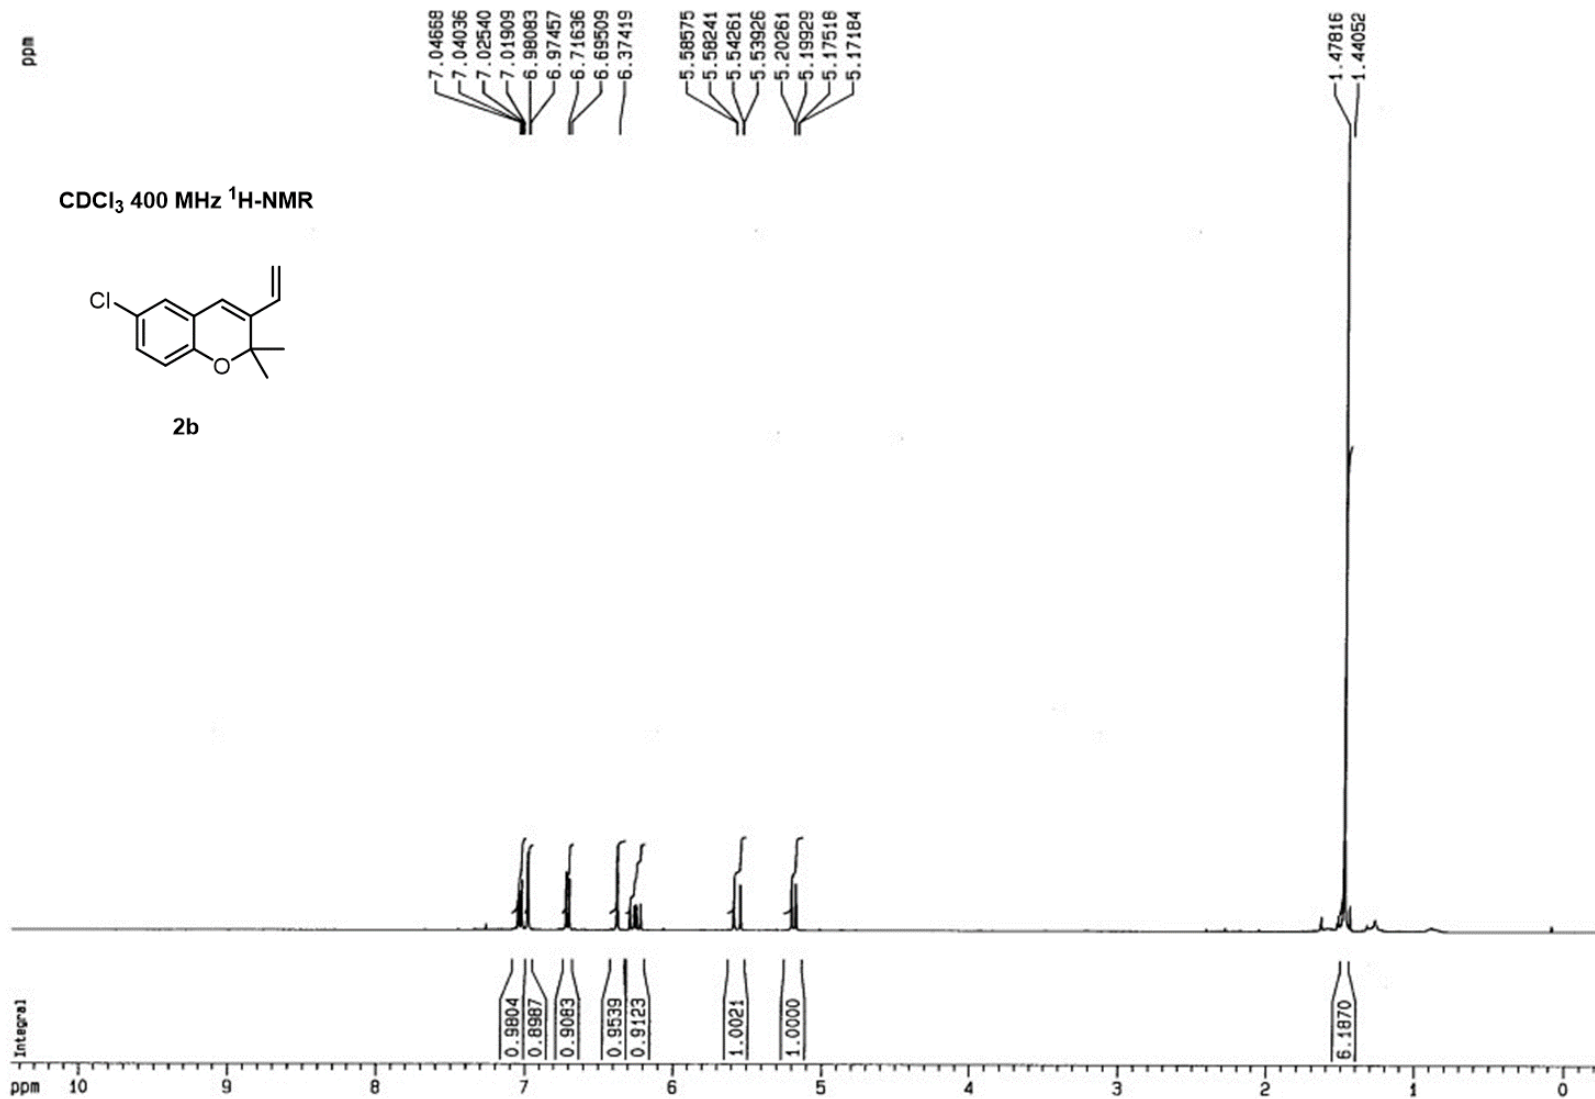

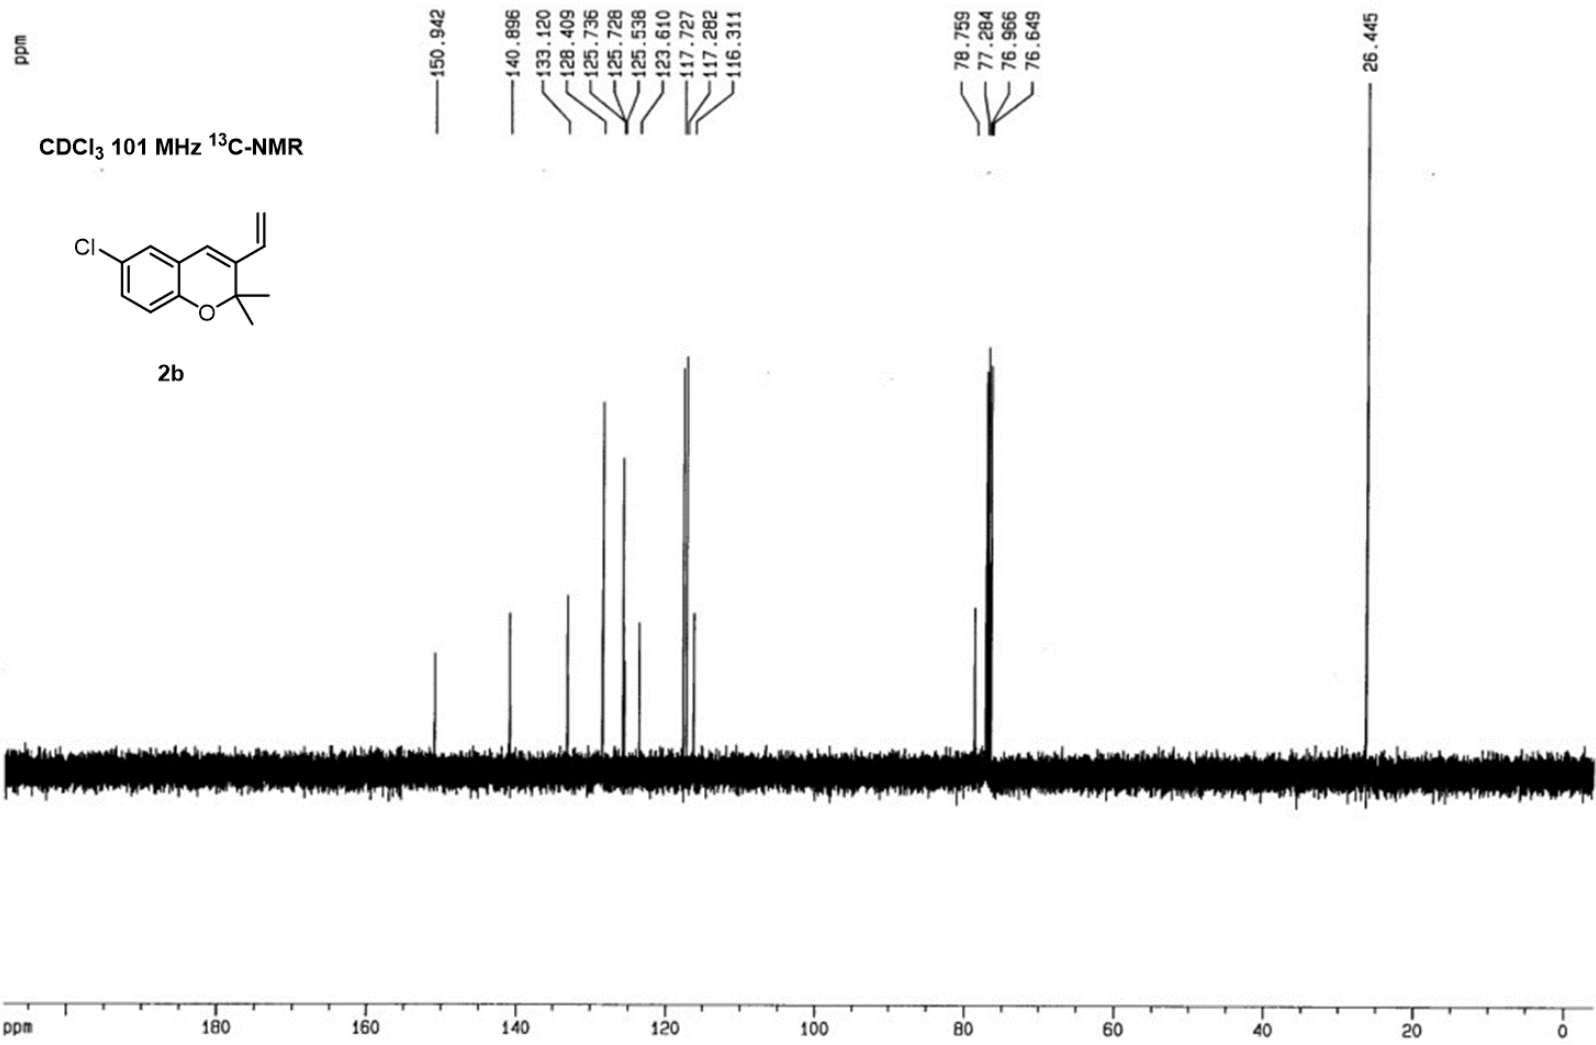

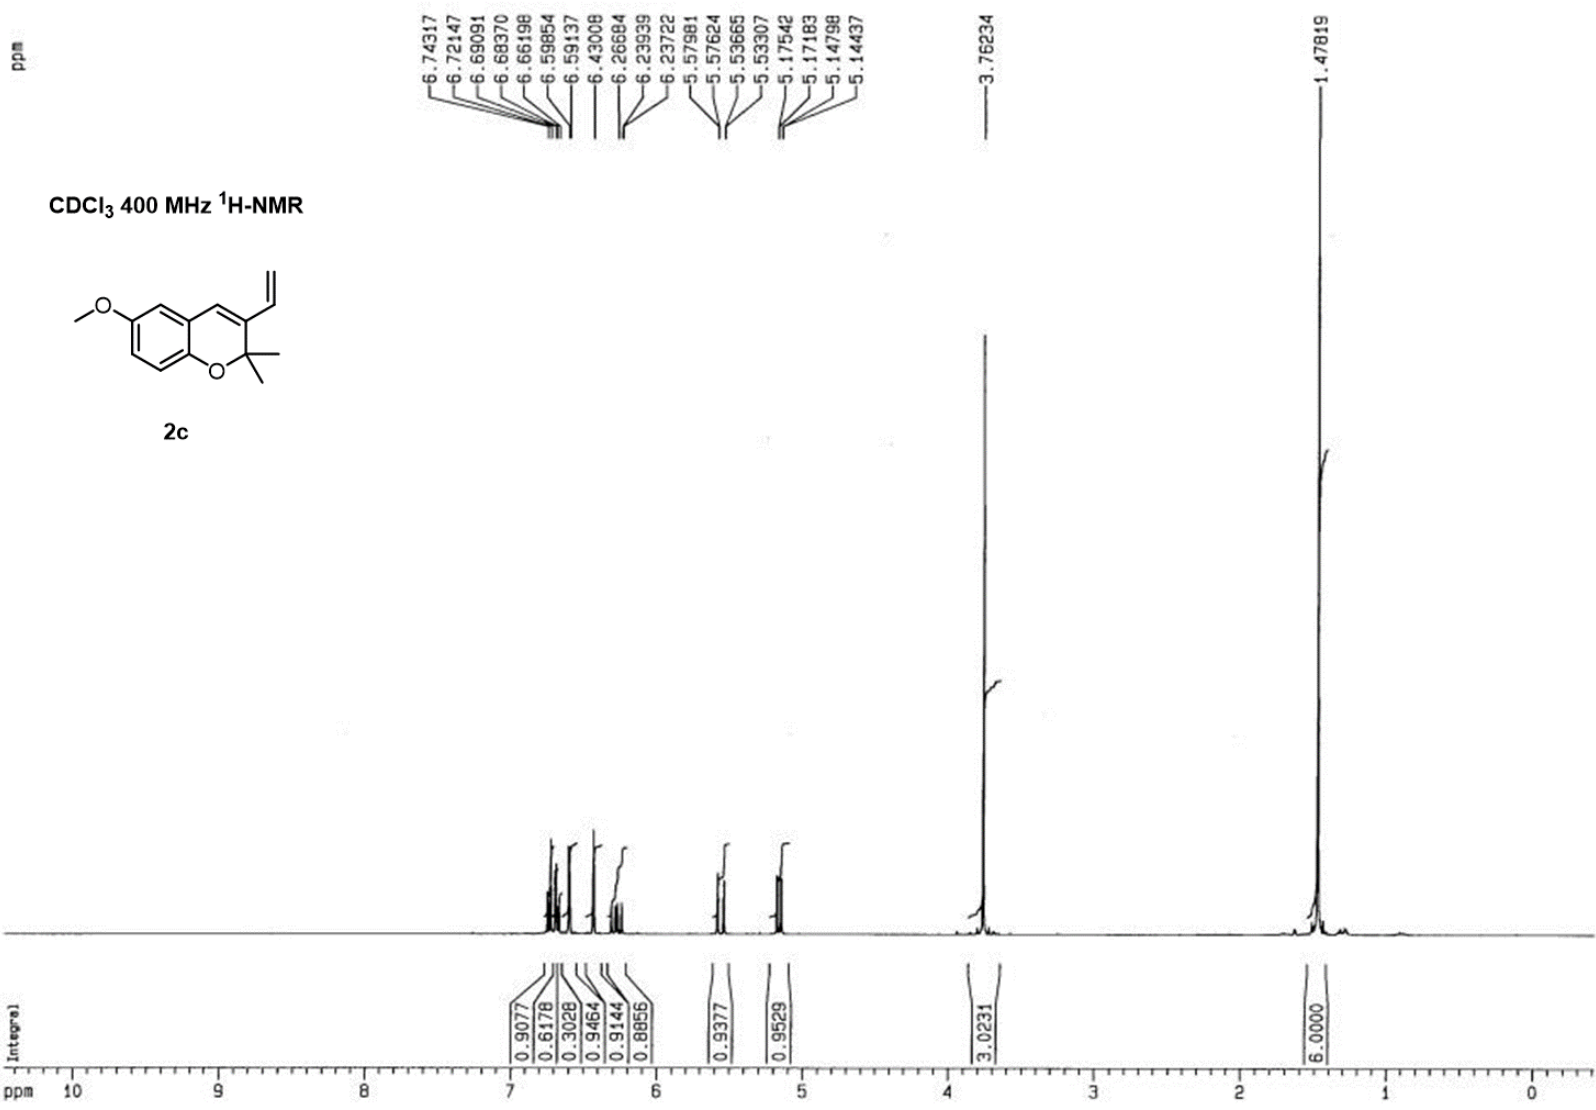

ppm

153.877  
146.338  
140.559  
133.450  
122.878  
118.924  
116.556  
115.598  
114.230  
111.252  
78.048  
77.331  
77.014  
76.697  
55.632  
26.222  
26.214

CDCl<sub>3</sub> 101 MHz <sup>13</sup>C-NMR

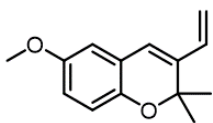

2c

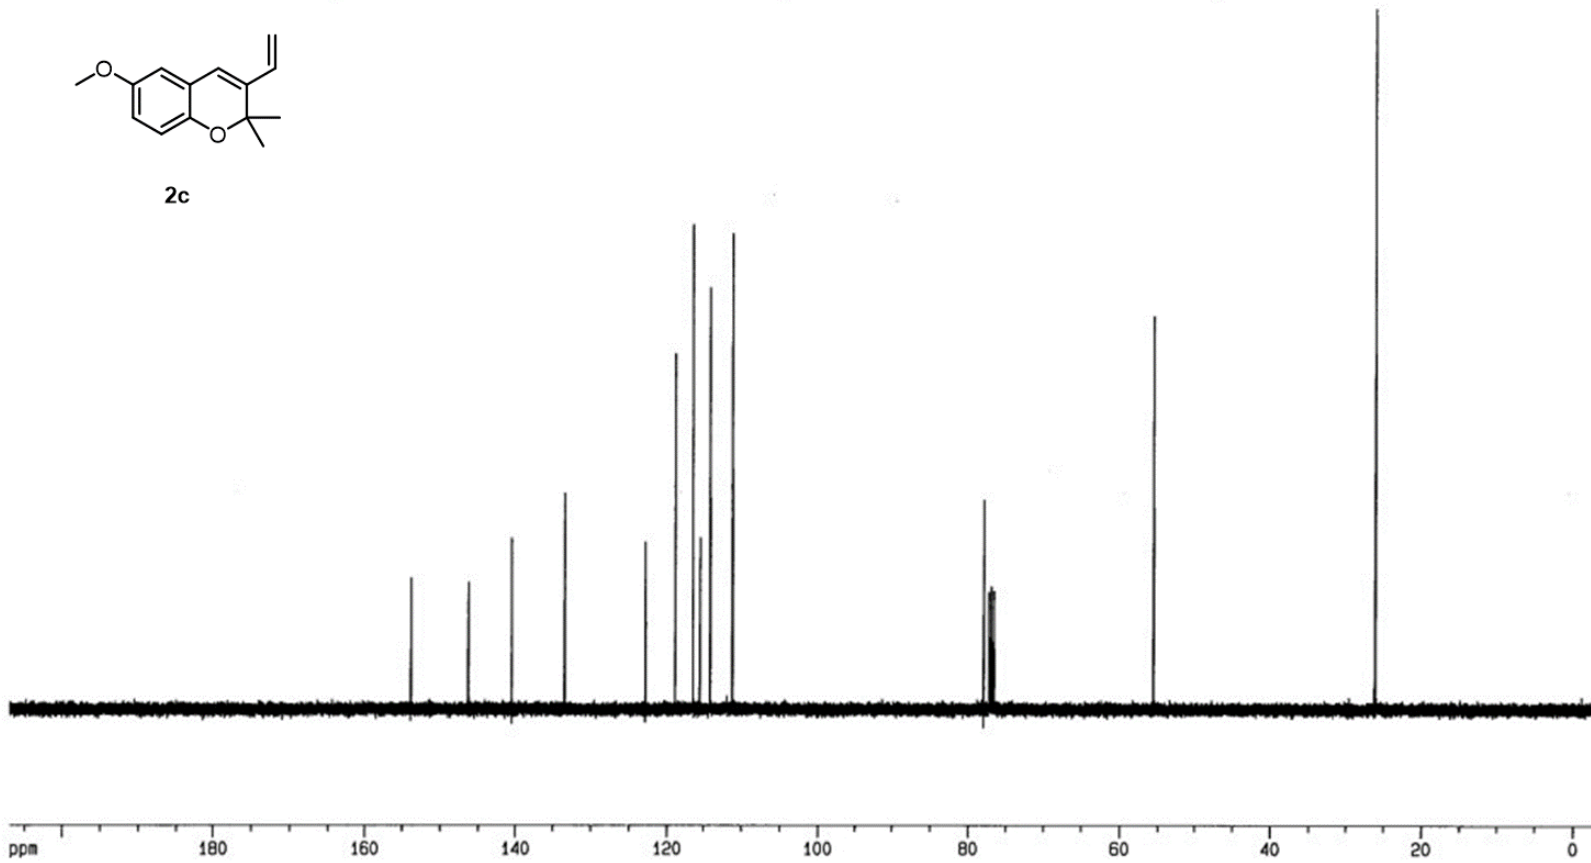

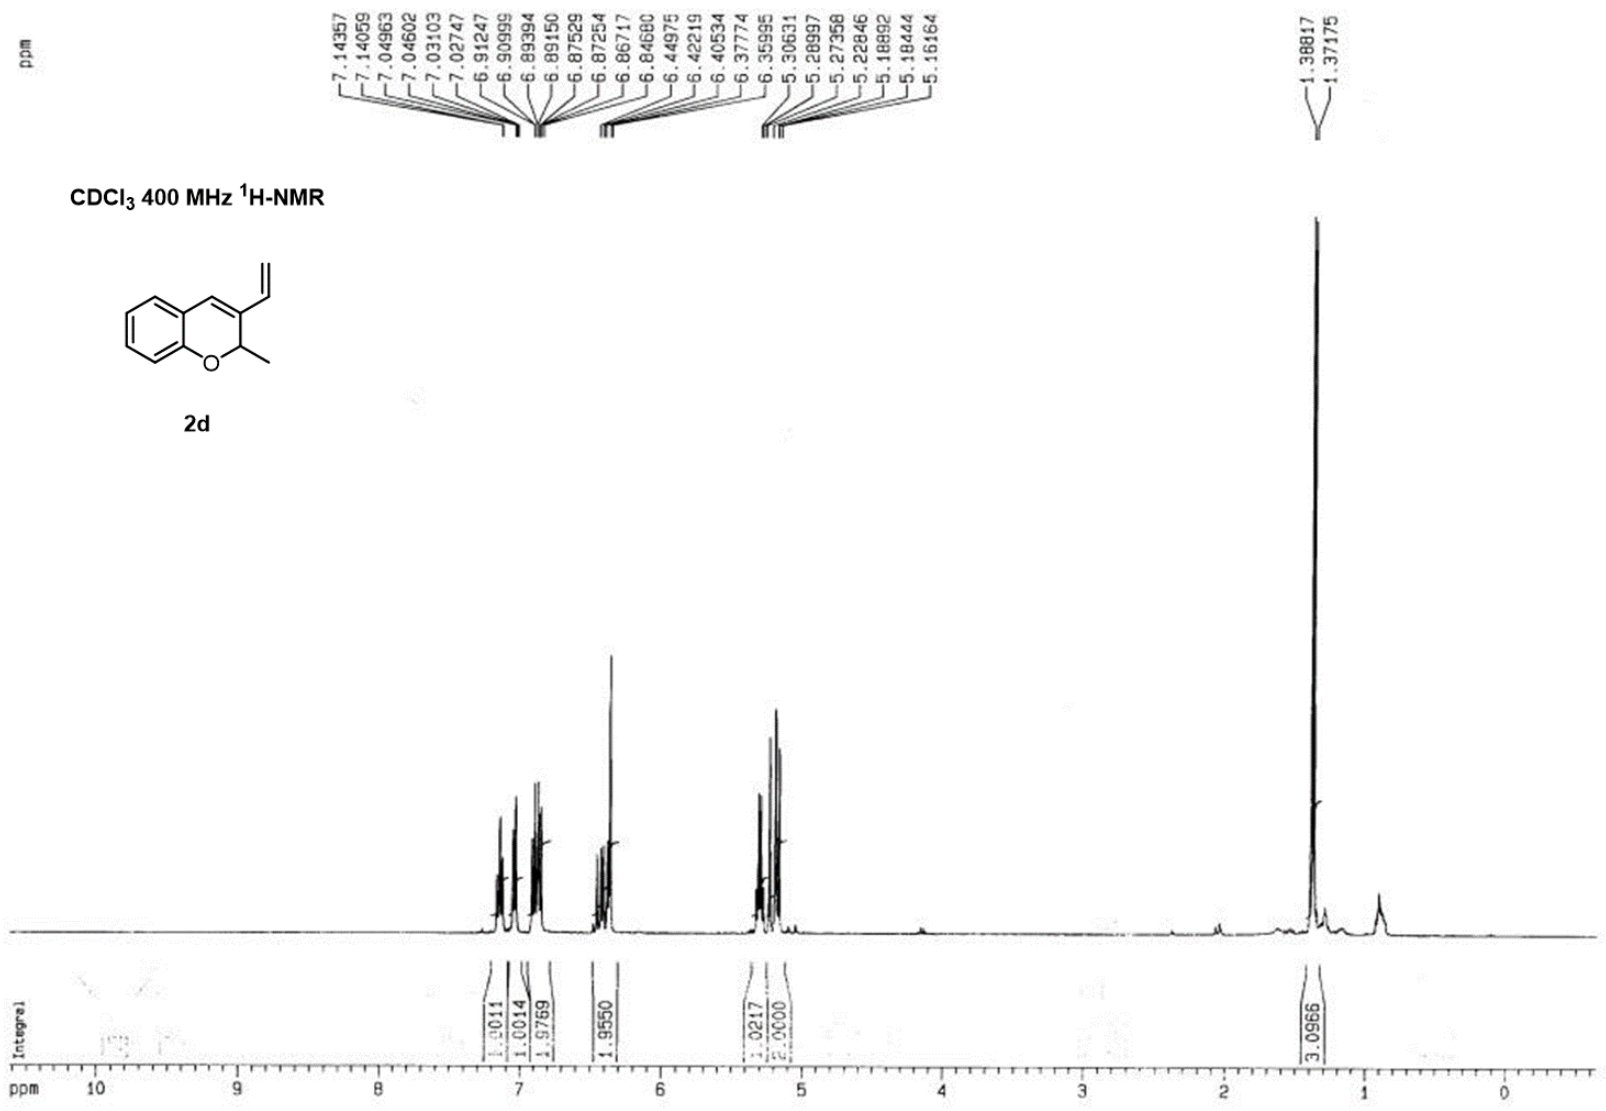

ppm

151.743  
135.548  
134.908  
129.267  
126.758  
122.517  
122.287  
121.164  
116.452  
113.267  
77.316  
76.999  
76.681  
70.935  
19.186

CDCl<sub>3</sub> 101 MHz <sup>13</sup>C-NMR

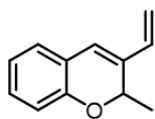

2d

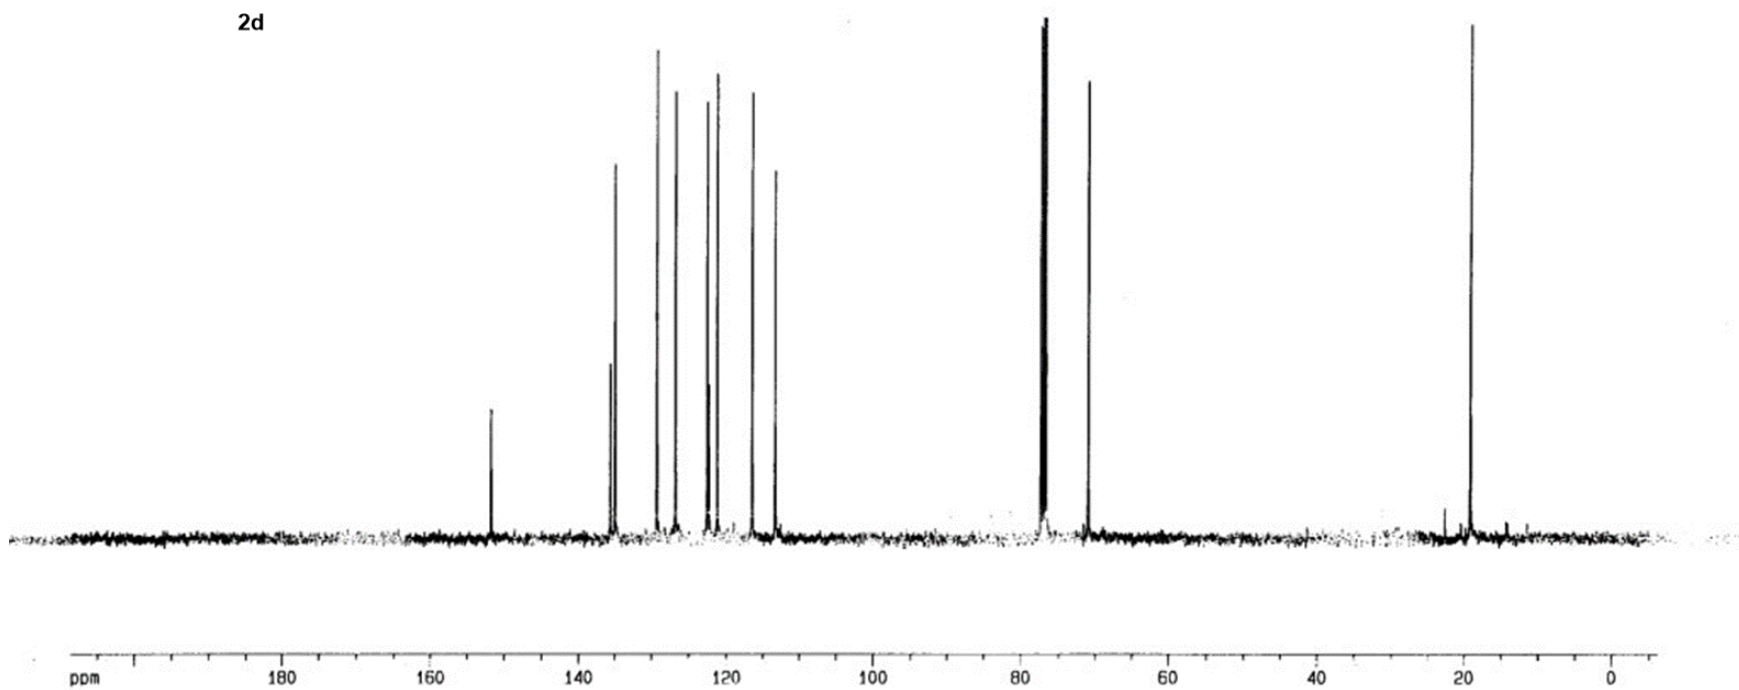

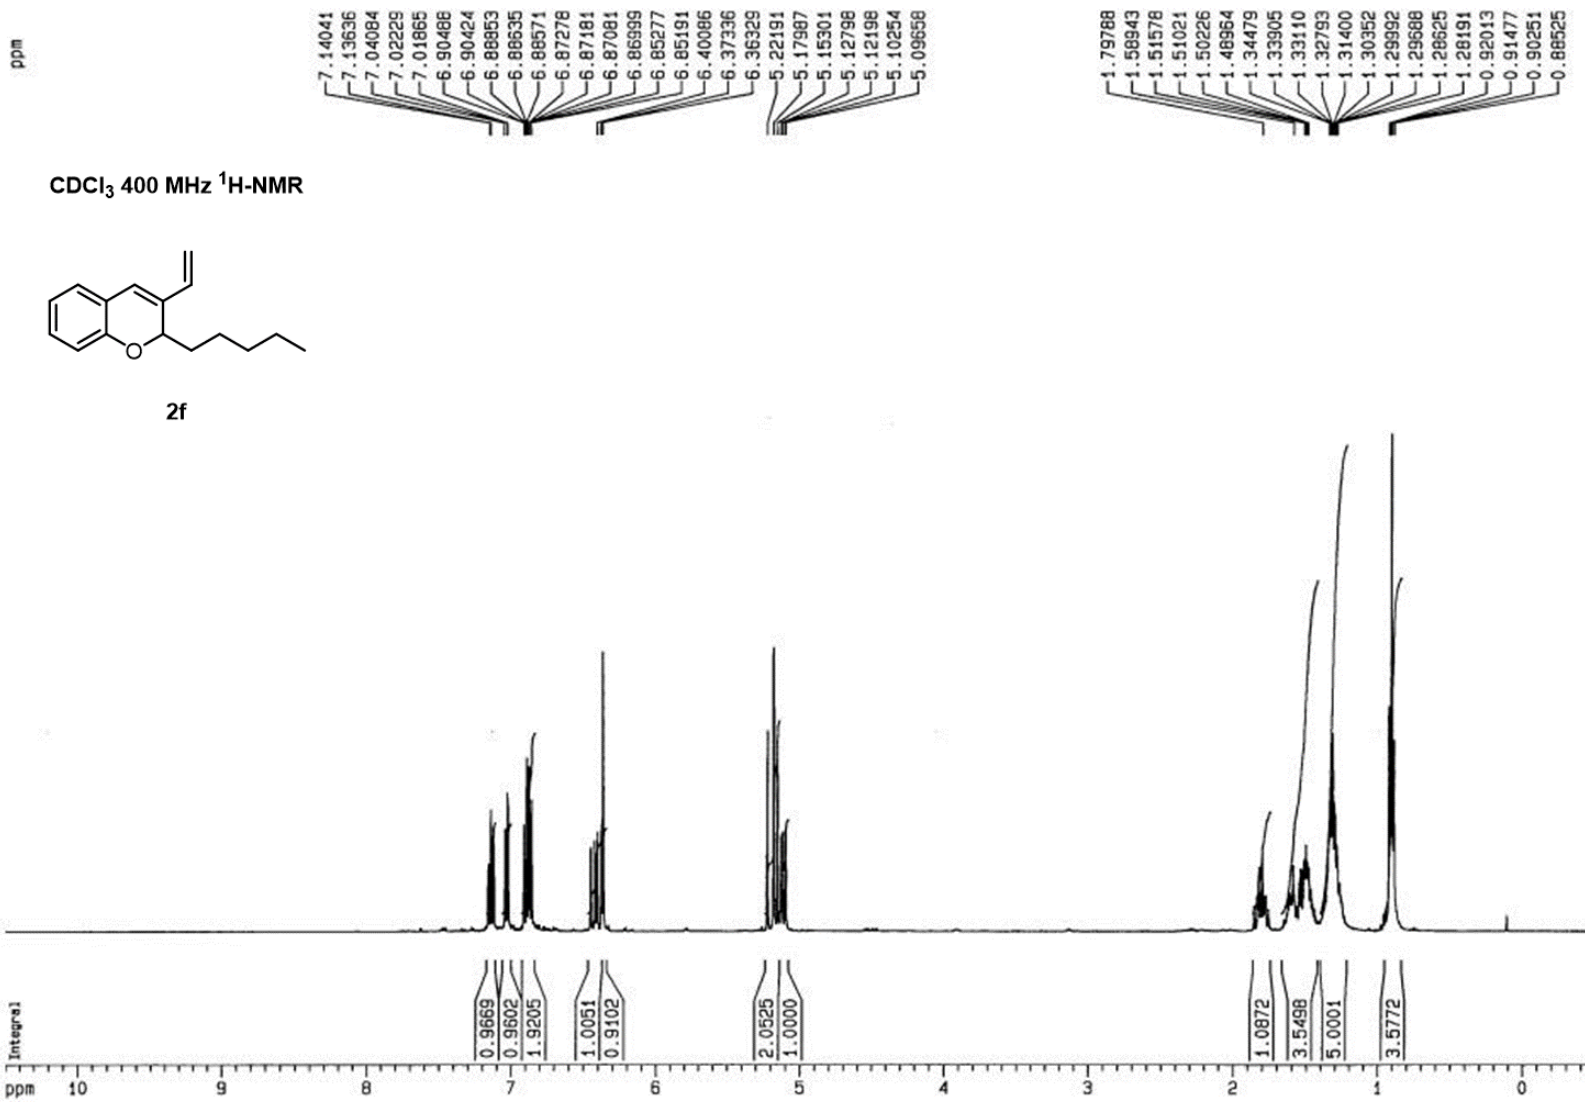



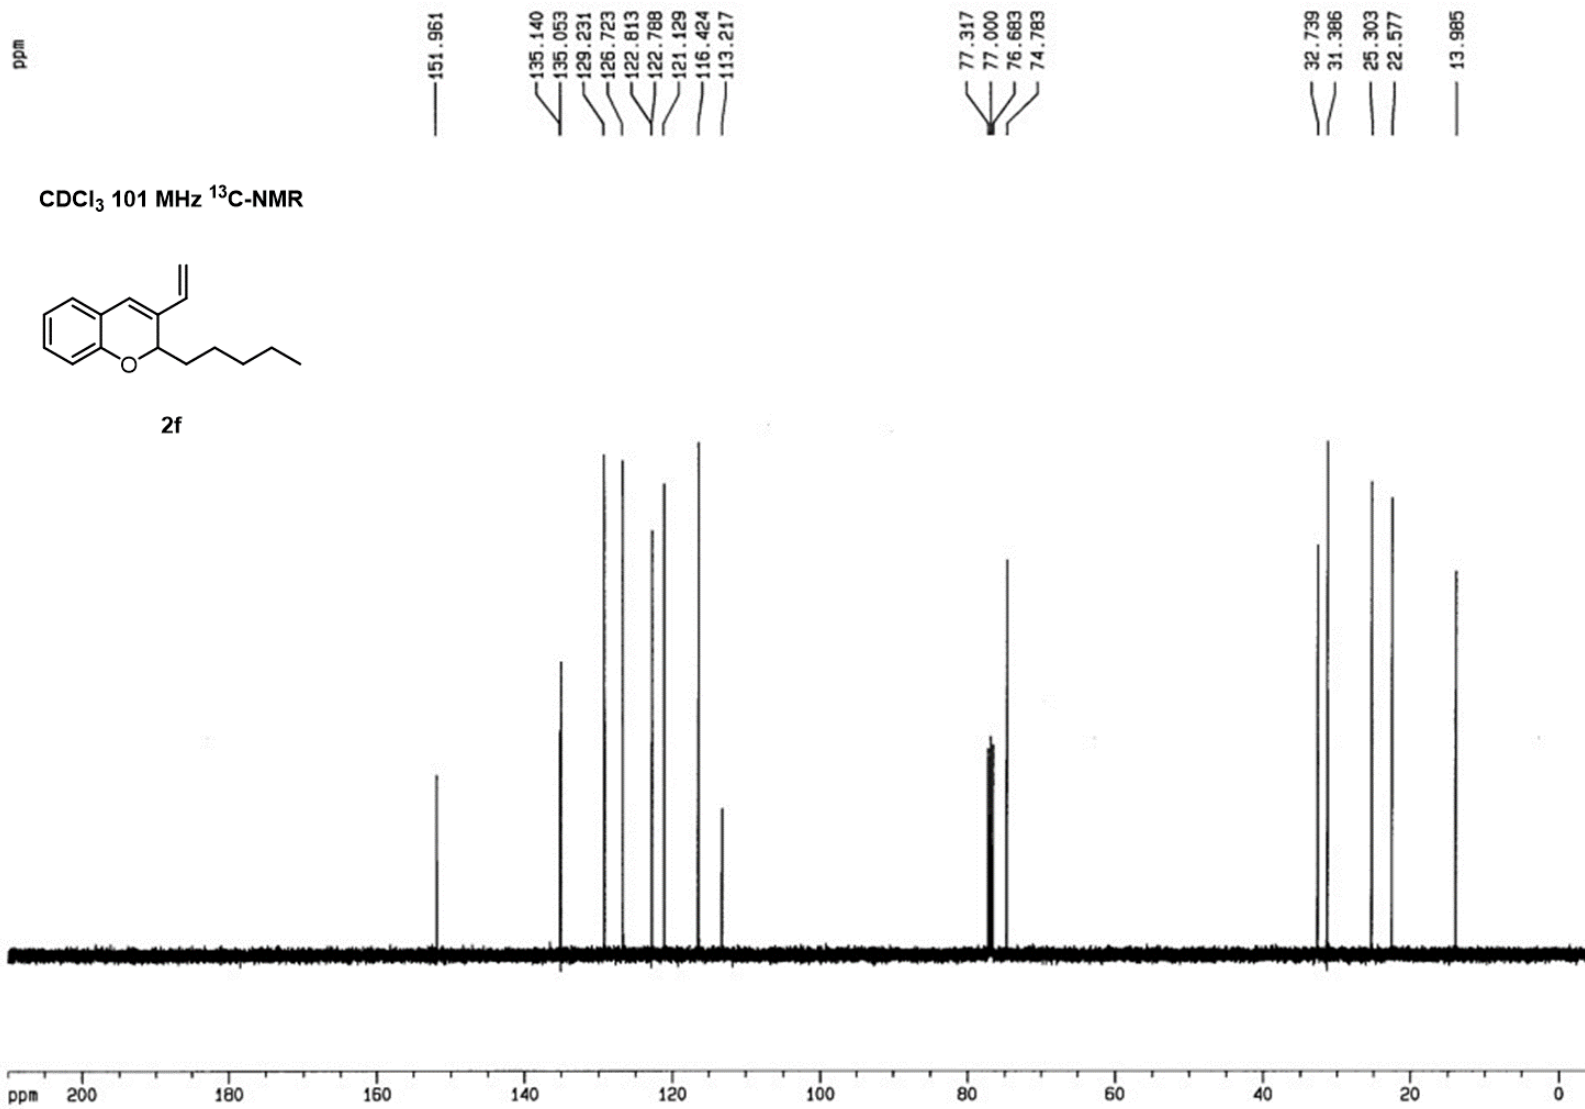

ppm

7.11232  
7.11066  
7.10815  
7.01493  
7.01073  
6.99635  
6.99217  
6.86668  
6.85031  
6.84819  
6.84546  
6.79953  
6.79768  
6.77947  
6.77762  
6.52467  
5.61376  
5.61010  
5.57055  
5.56688  
5.17956  
5.17609  
5.15204  
5.14857  
5.14491  
5.12171  
5.11819

1.68337  
1.58801  
1.50647  
1.50200  
1.48605

CDCl<sub>3</sub> 400 MHz <sup>1</sup>H-NMR

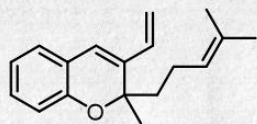

2j

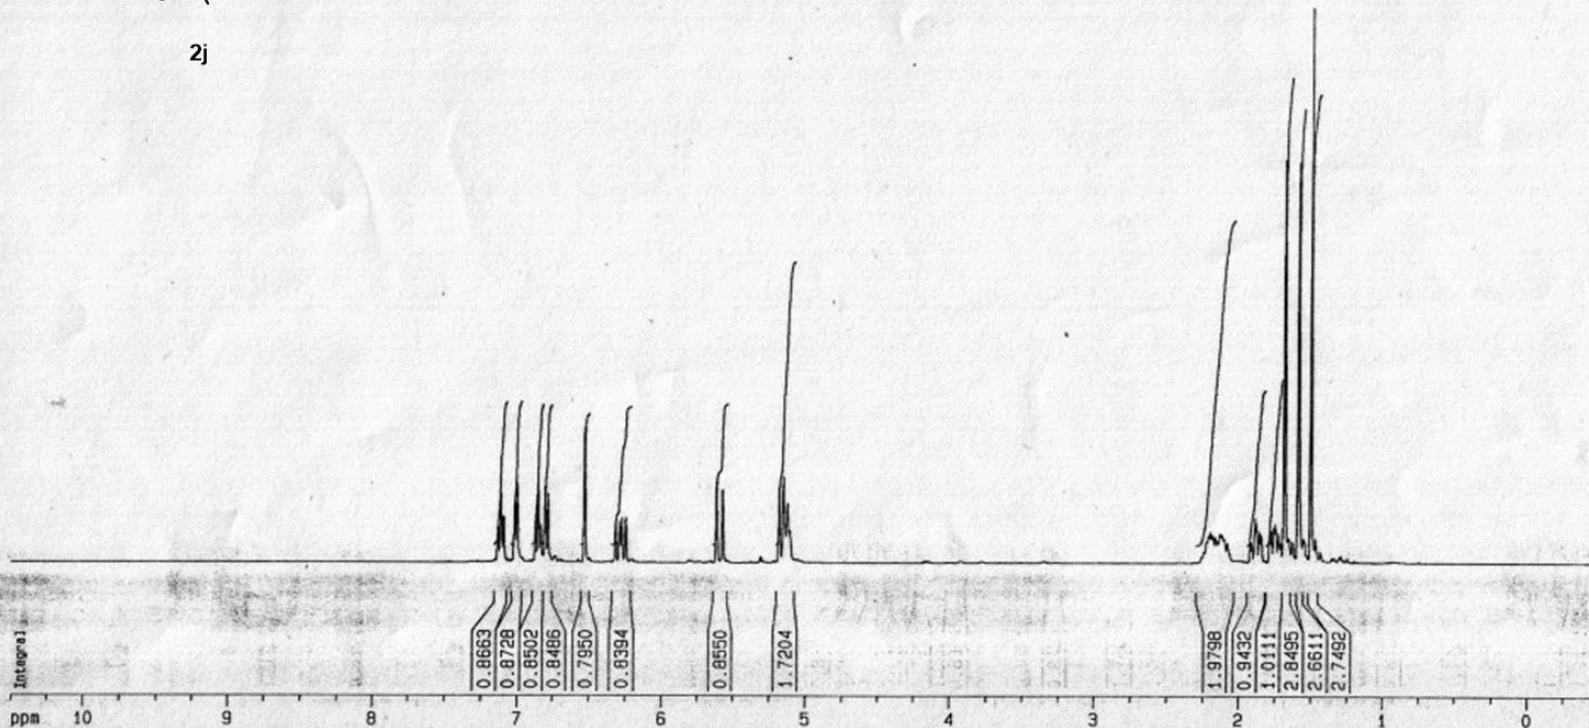

ppm

CDCl<sub>3</sub> 101 MHz <sup>13</sup>C-NMR

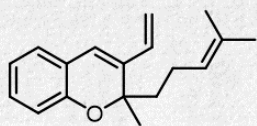

2j

152.851  
138.282  
133.795  
131.619  
129.015  
126.373  
124.075  
121.754  
120.645  
119.858  
115.699  
115.216  
80.925  
77.323  
77.005  
76.687  
39.711  
25.646  
25.617  
22.574  
17.552

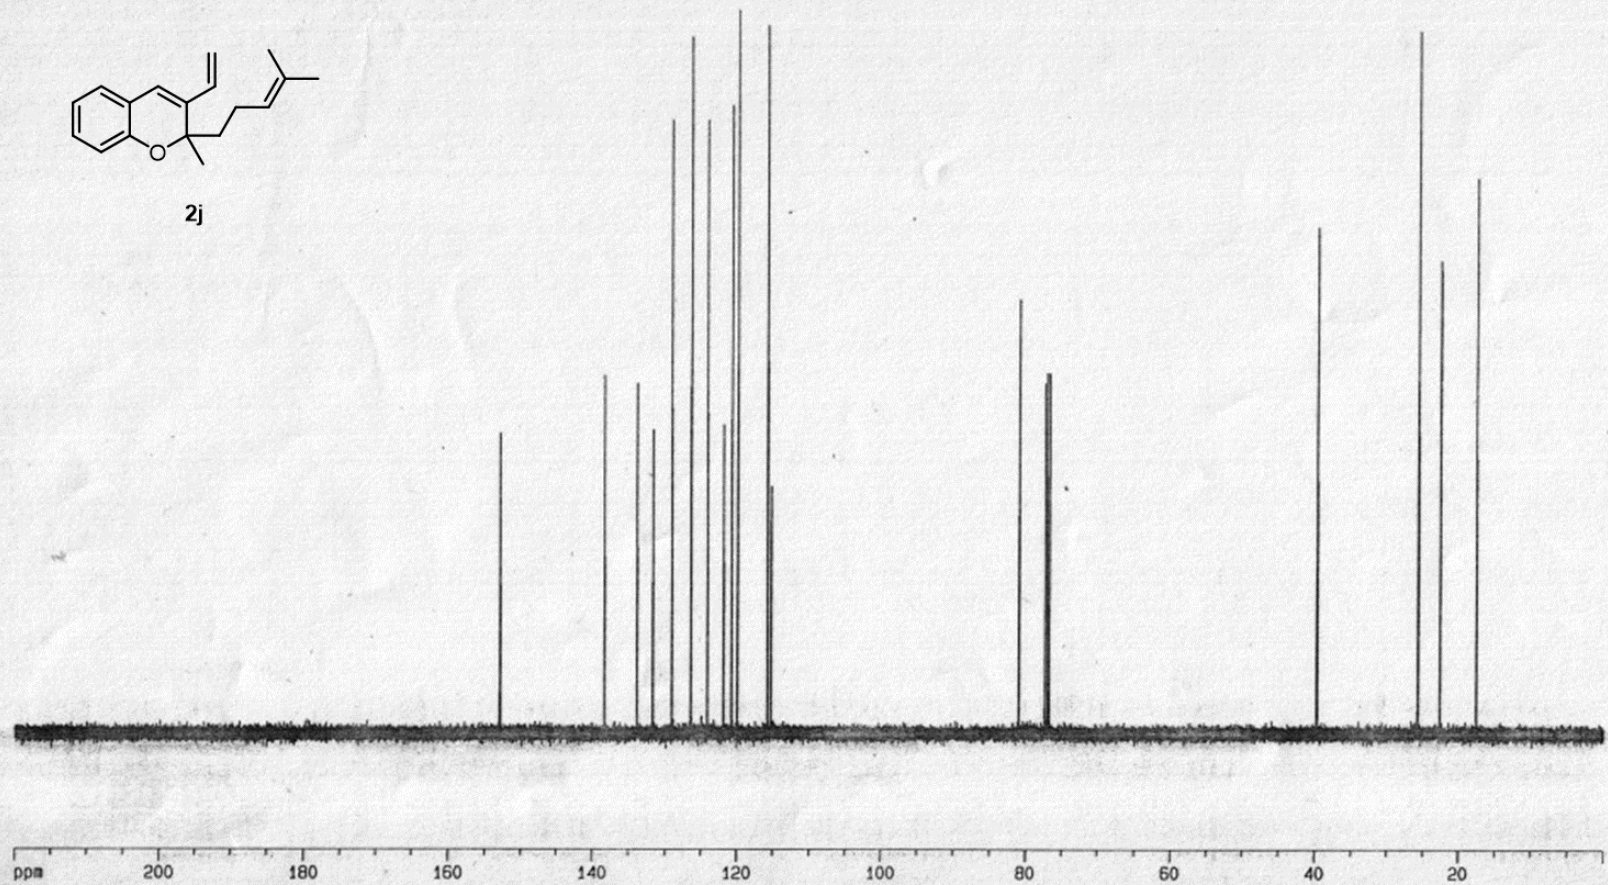

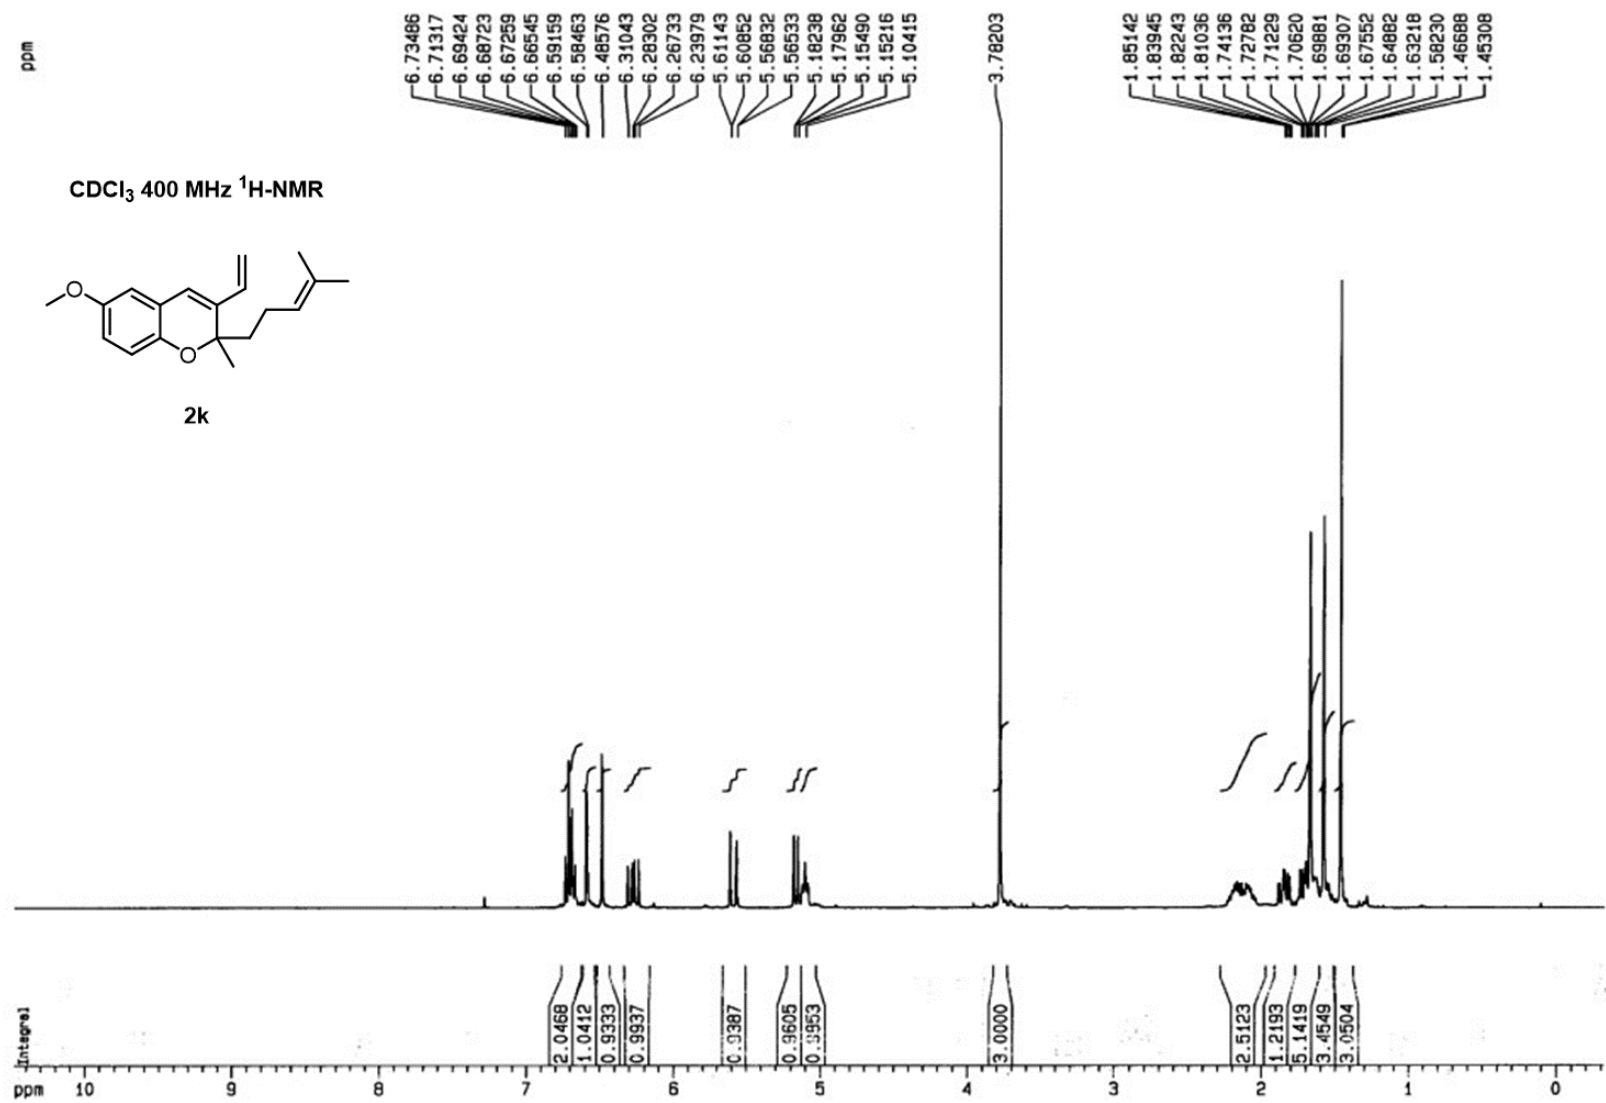

ppm

153.649  
146.615  
139.425  
133.690  
131.596  
124.030  
122.407  
119.716  
116.222  
115.377  
114.227  
111.262

80.472  
77.277  
76.959  
76.642

55.655

39.240

25.618  
25.029  
22.478

17.528

CDCl<sub>3</sub> 101 MHz <sup>13</sup>C-NMR

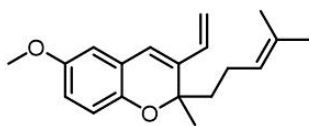

2k

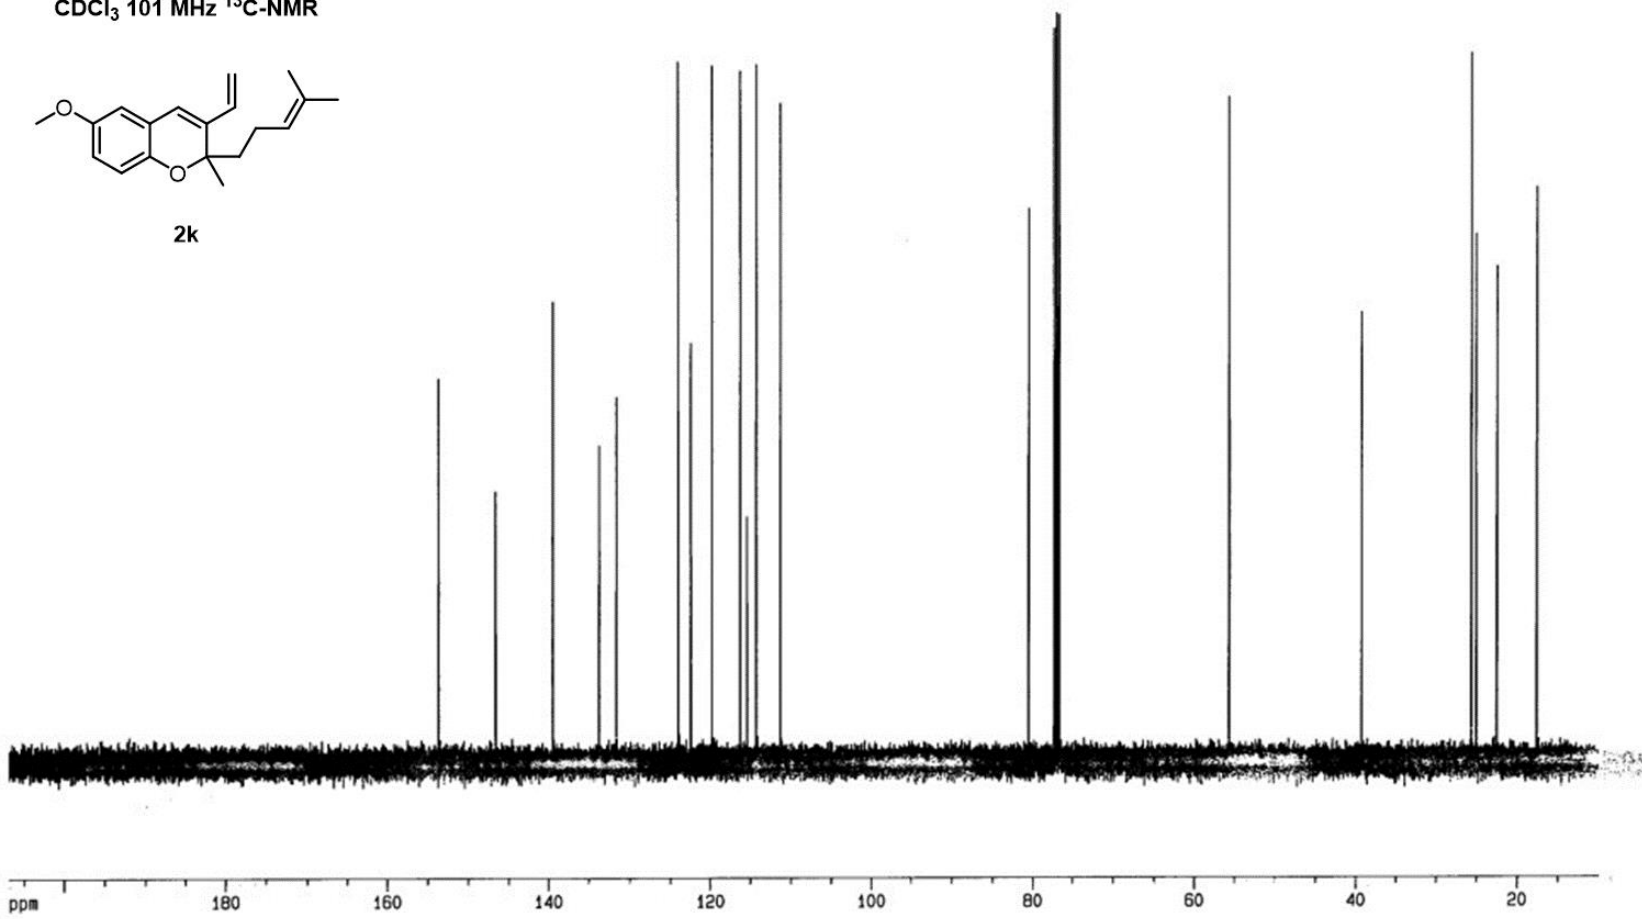

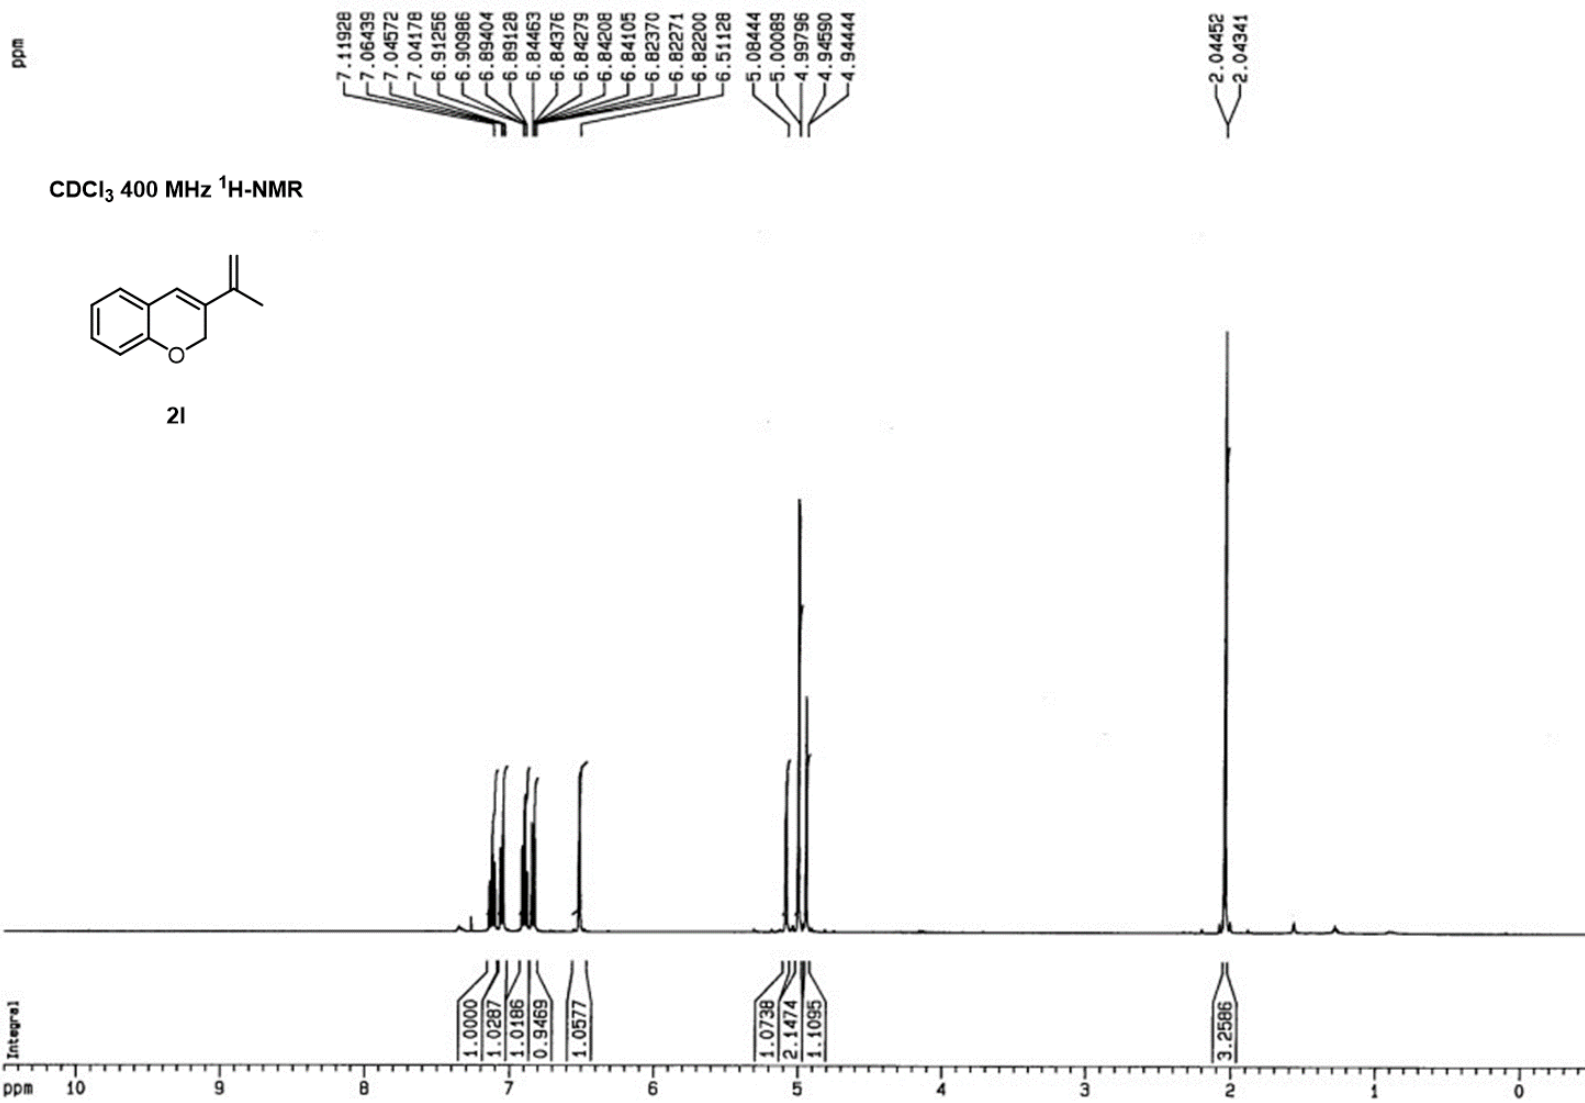

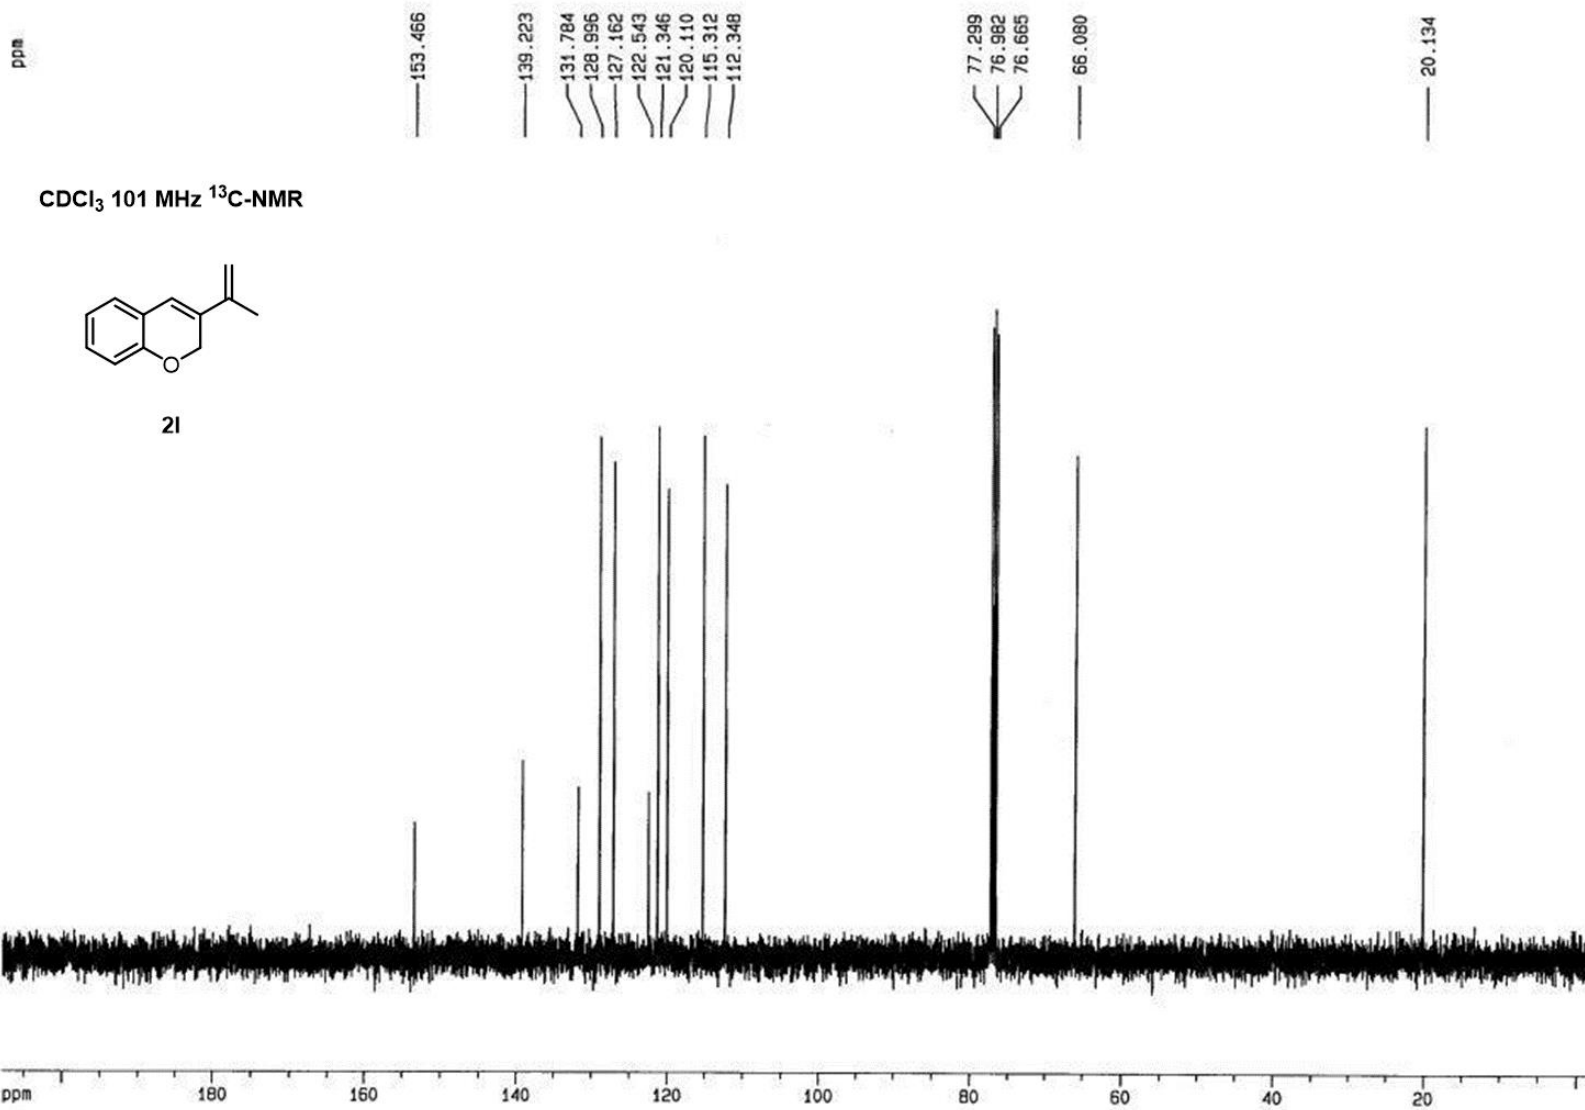

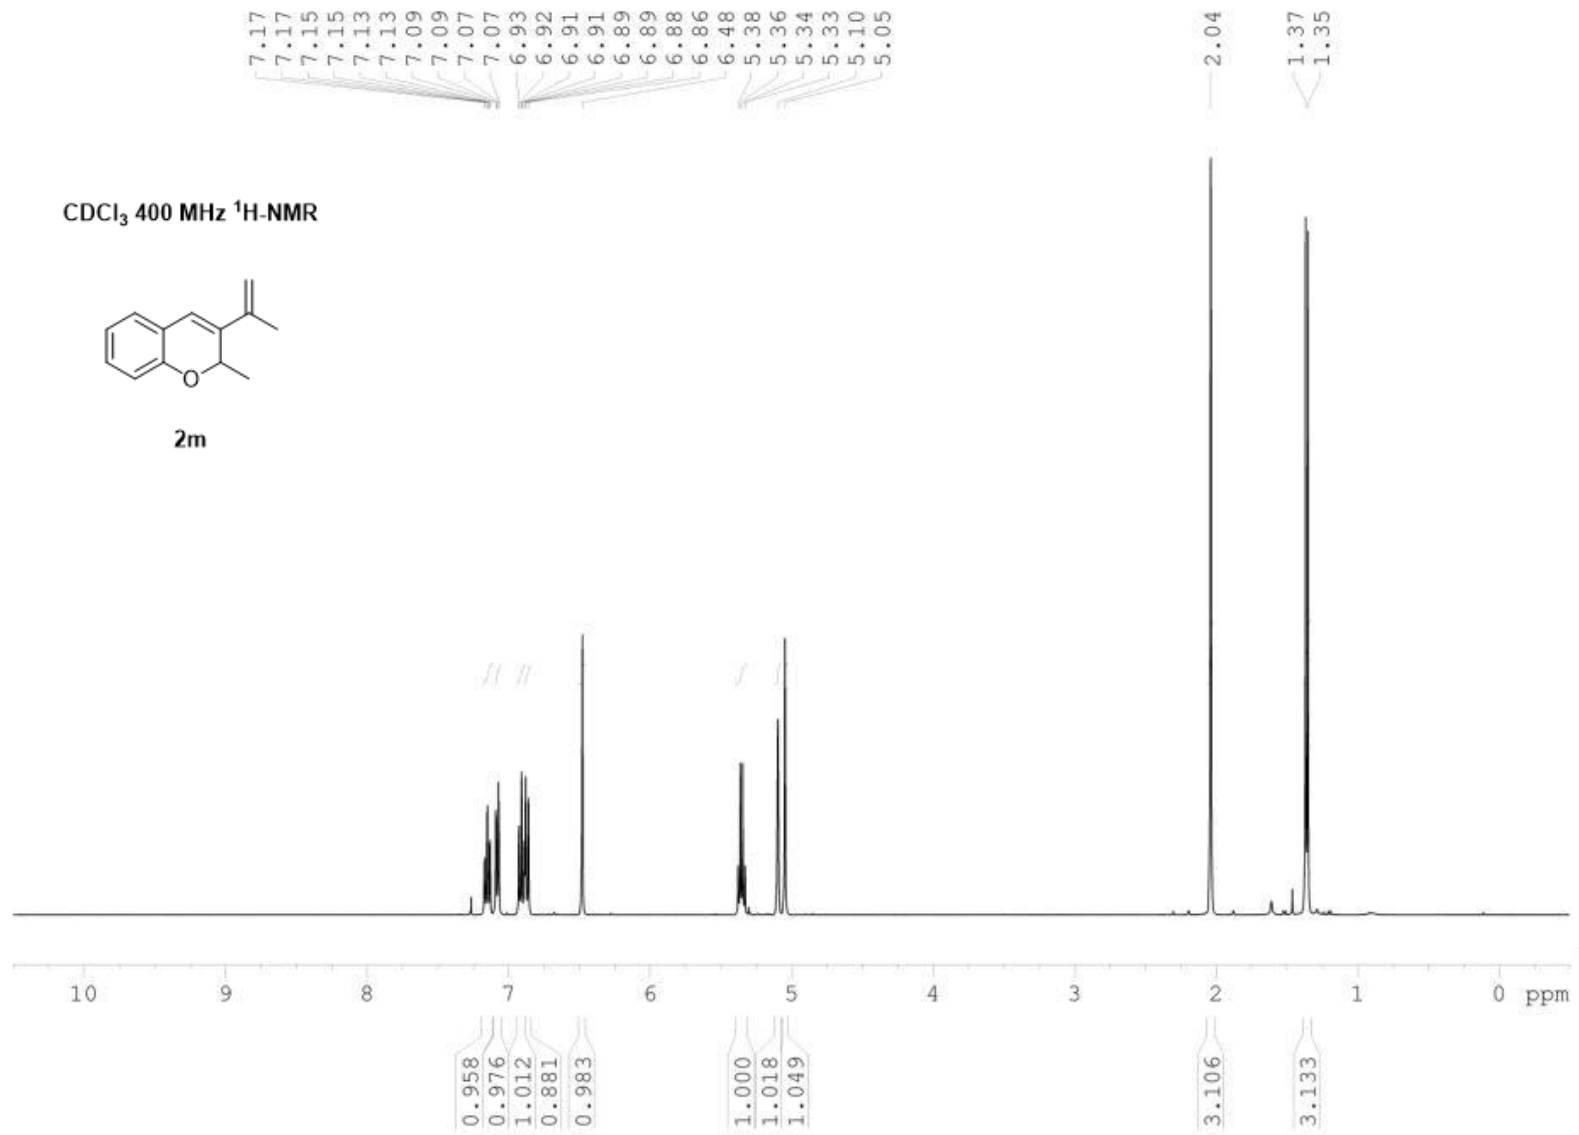



CDCl<sub>3</sub> 101 MHz <sup>13</sup>C-NMR

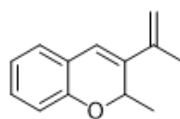

2m

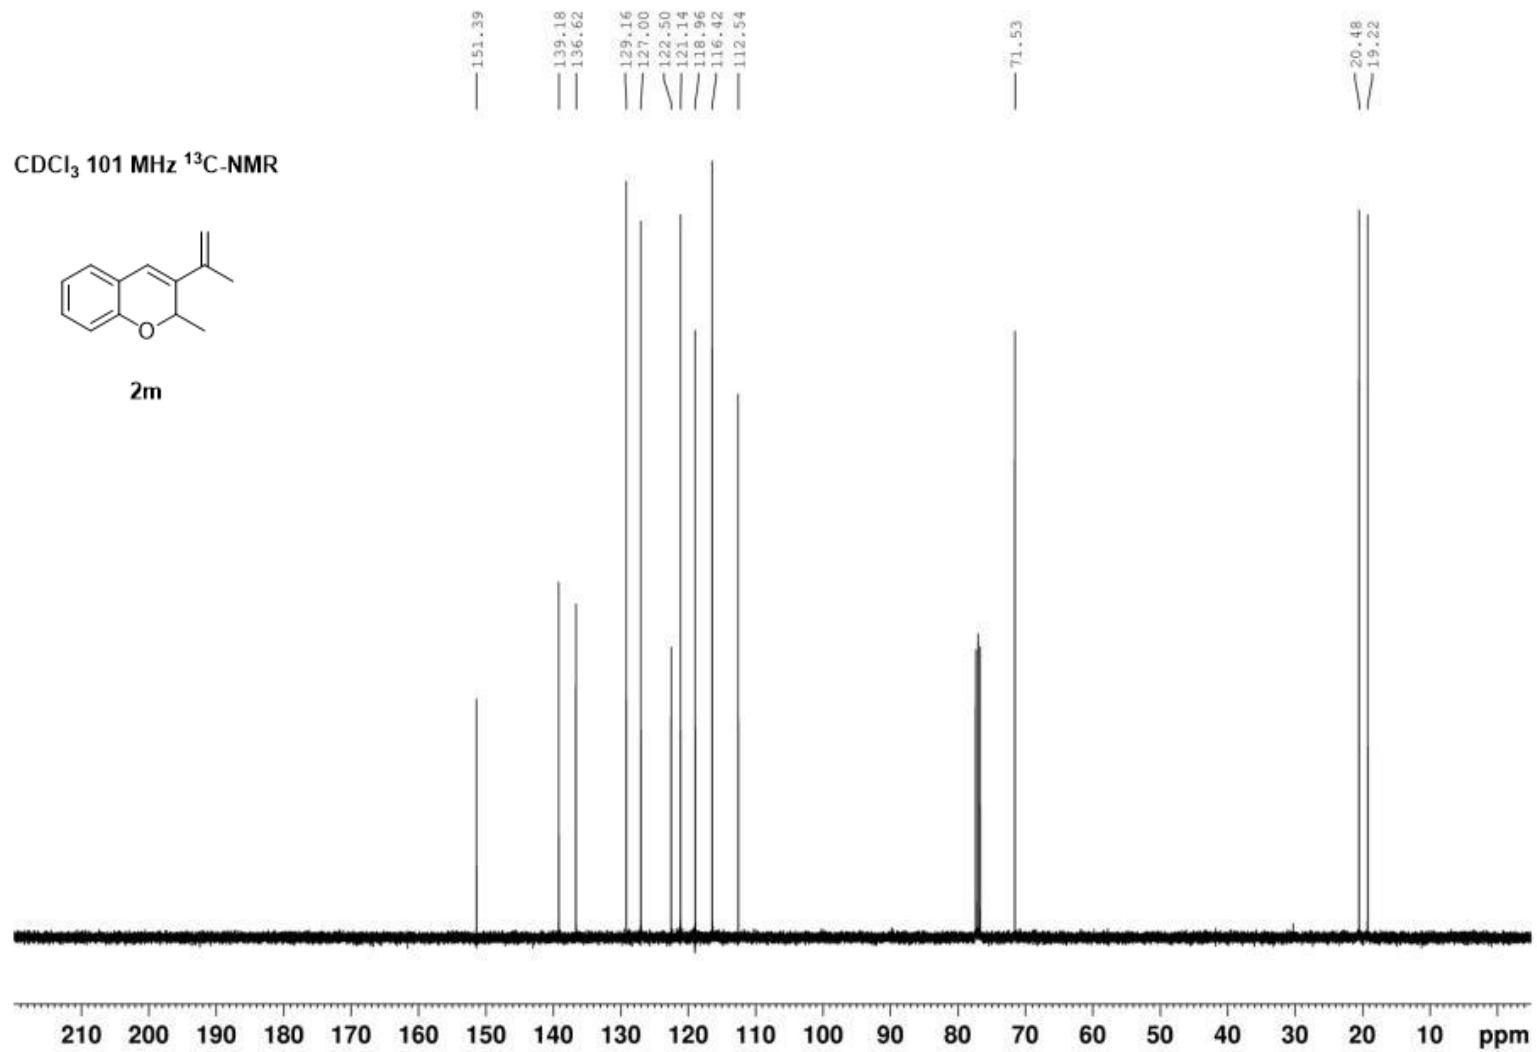

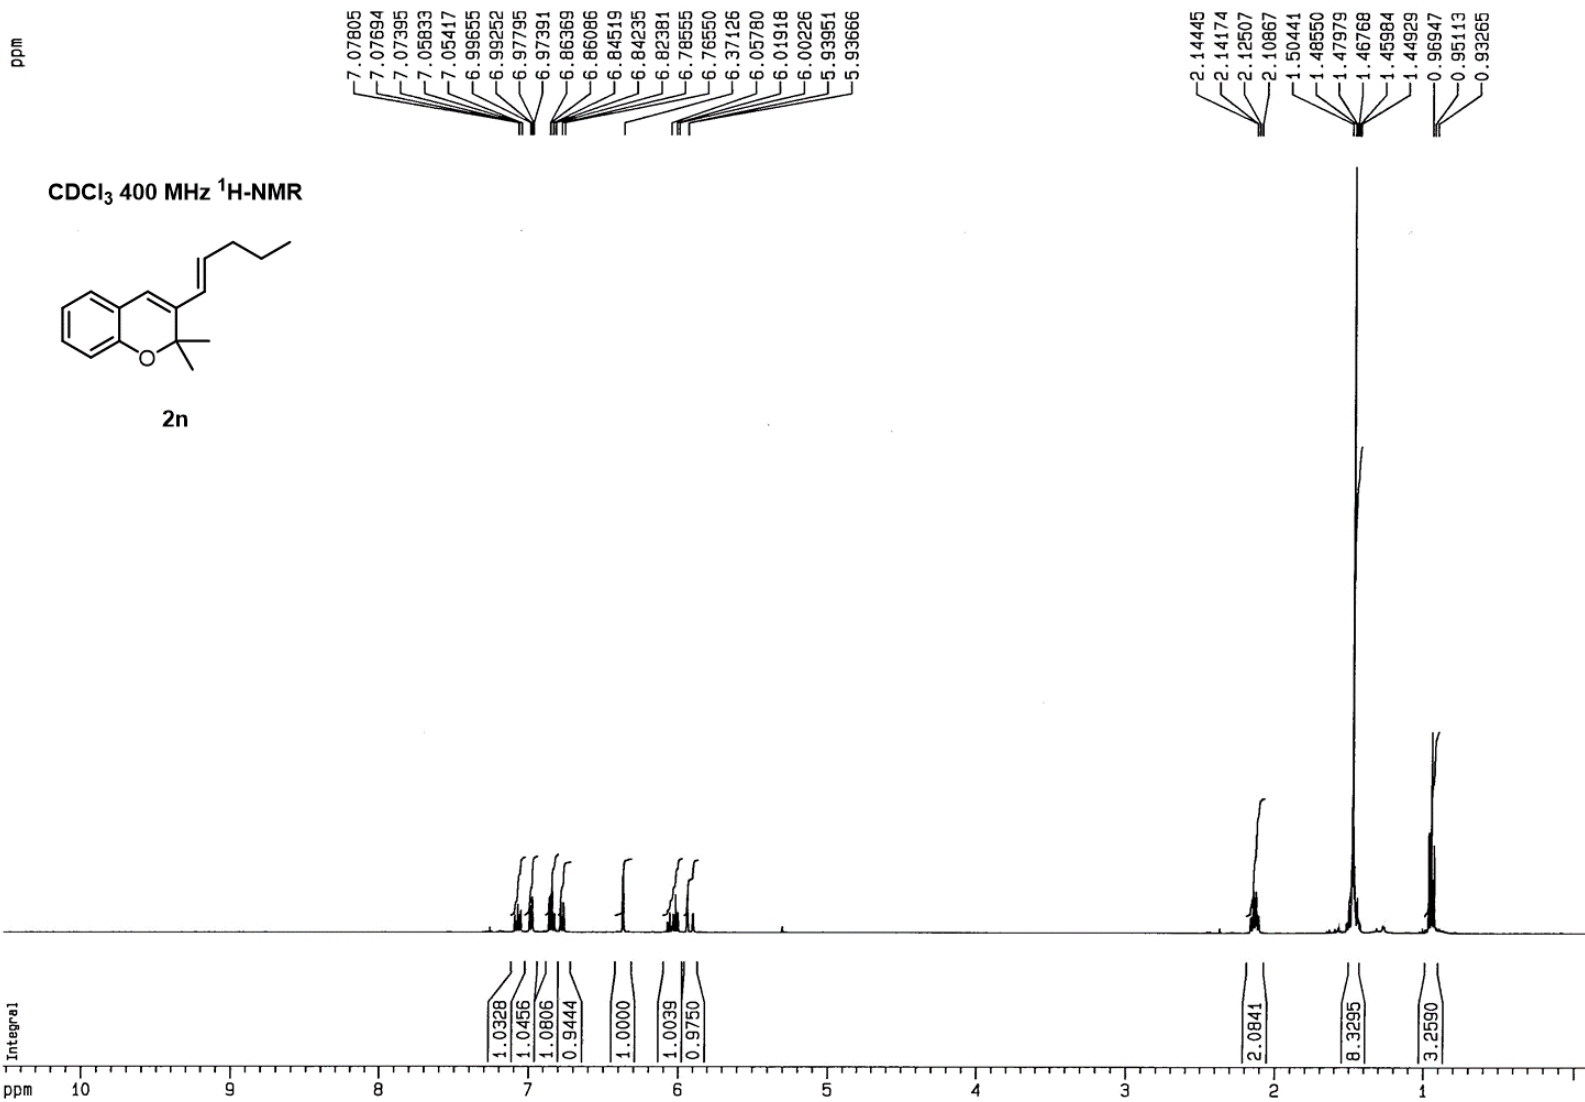

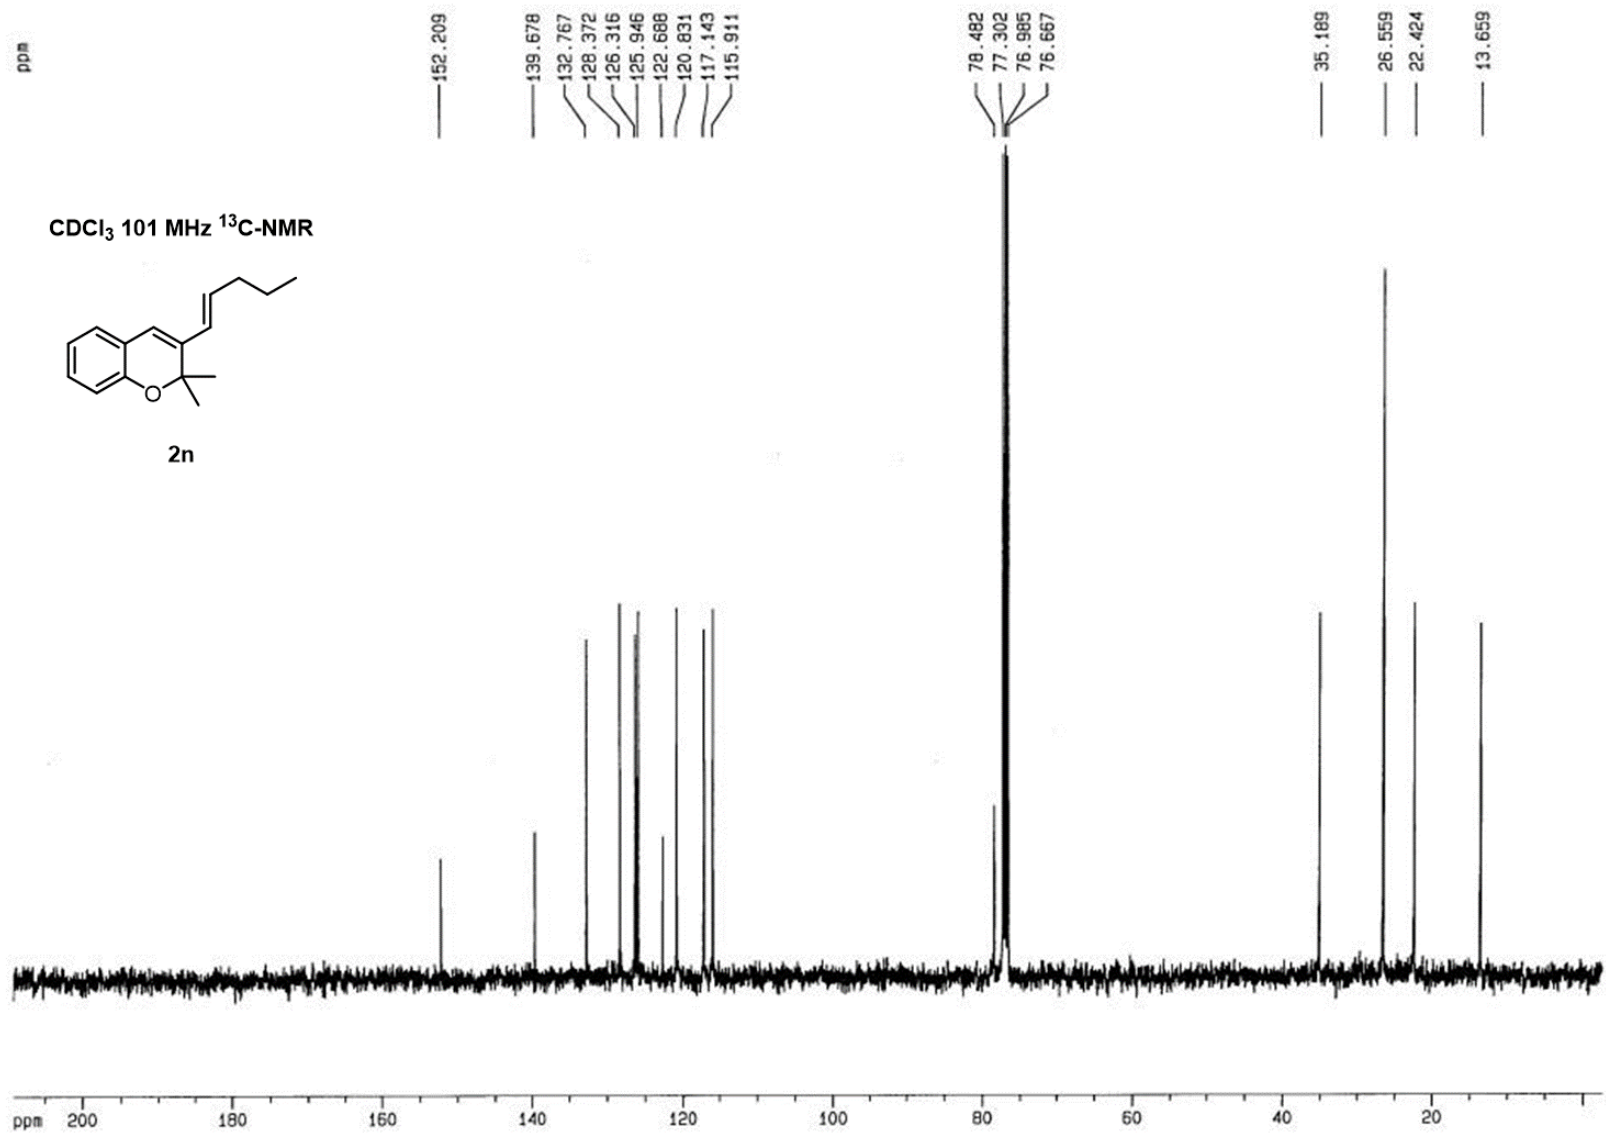

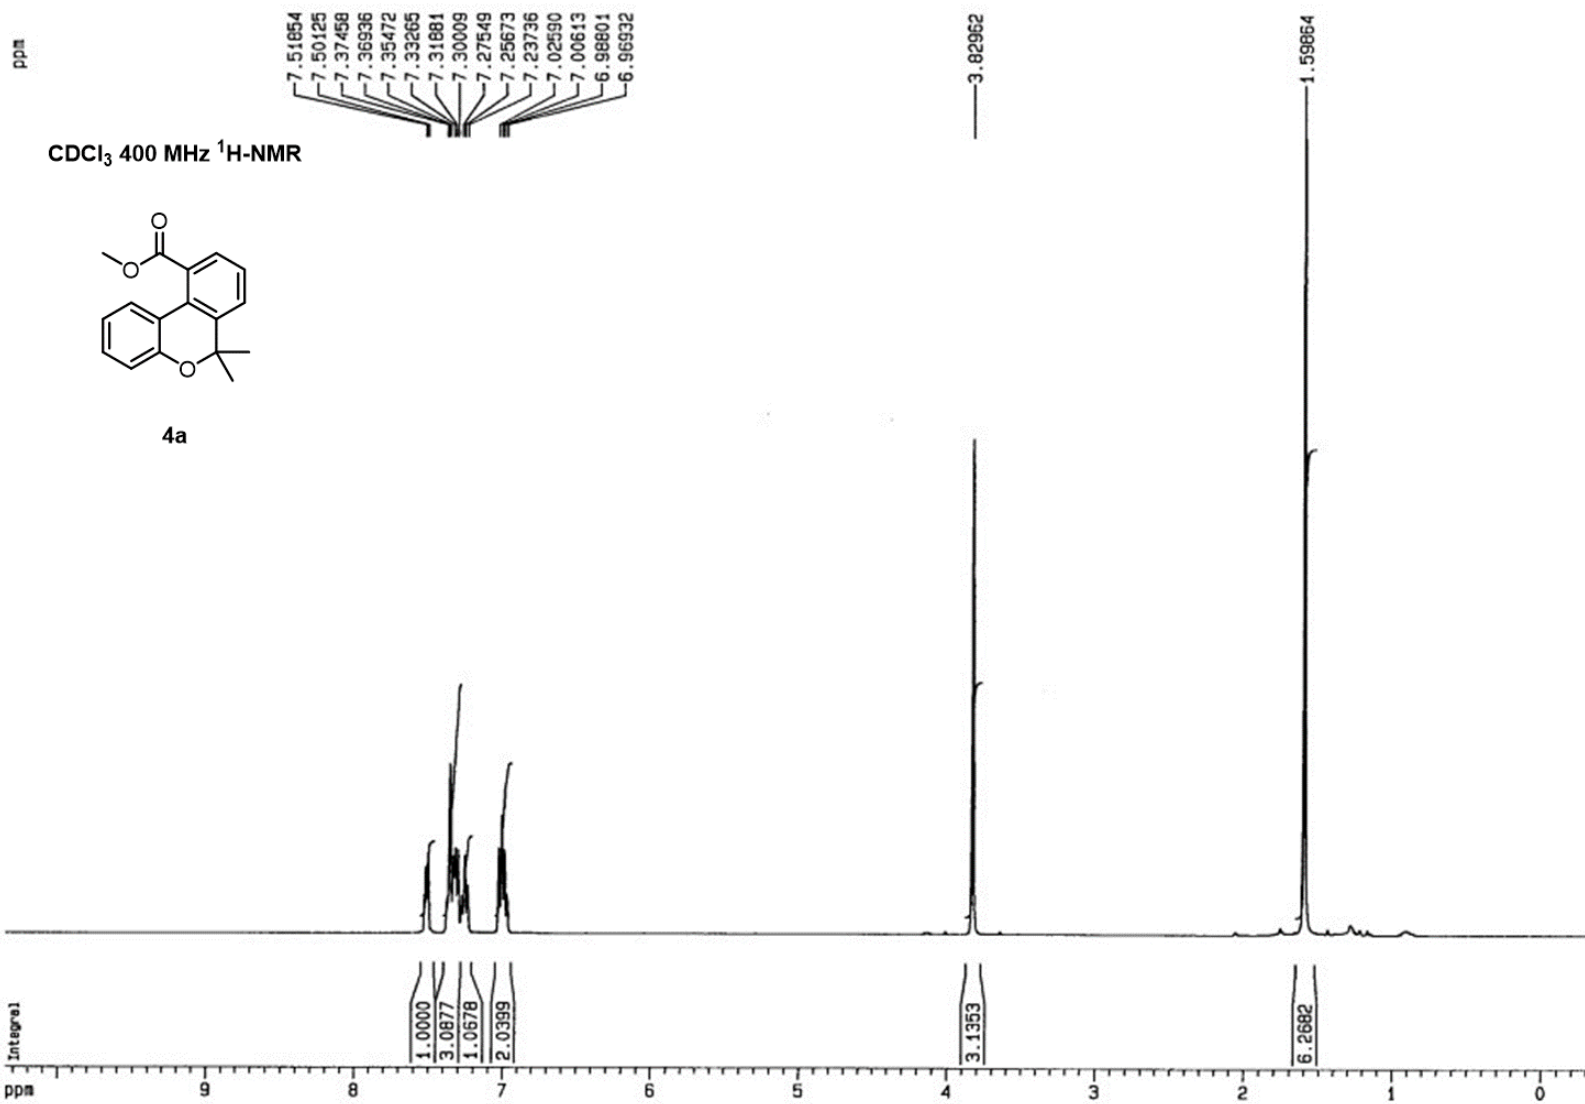

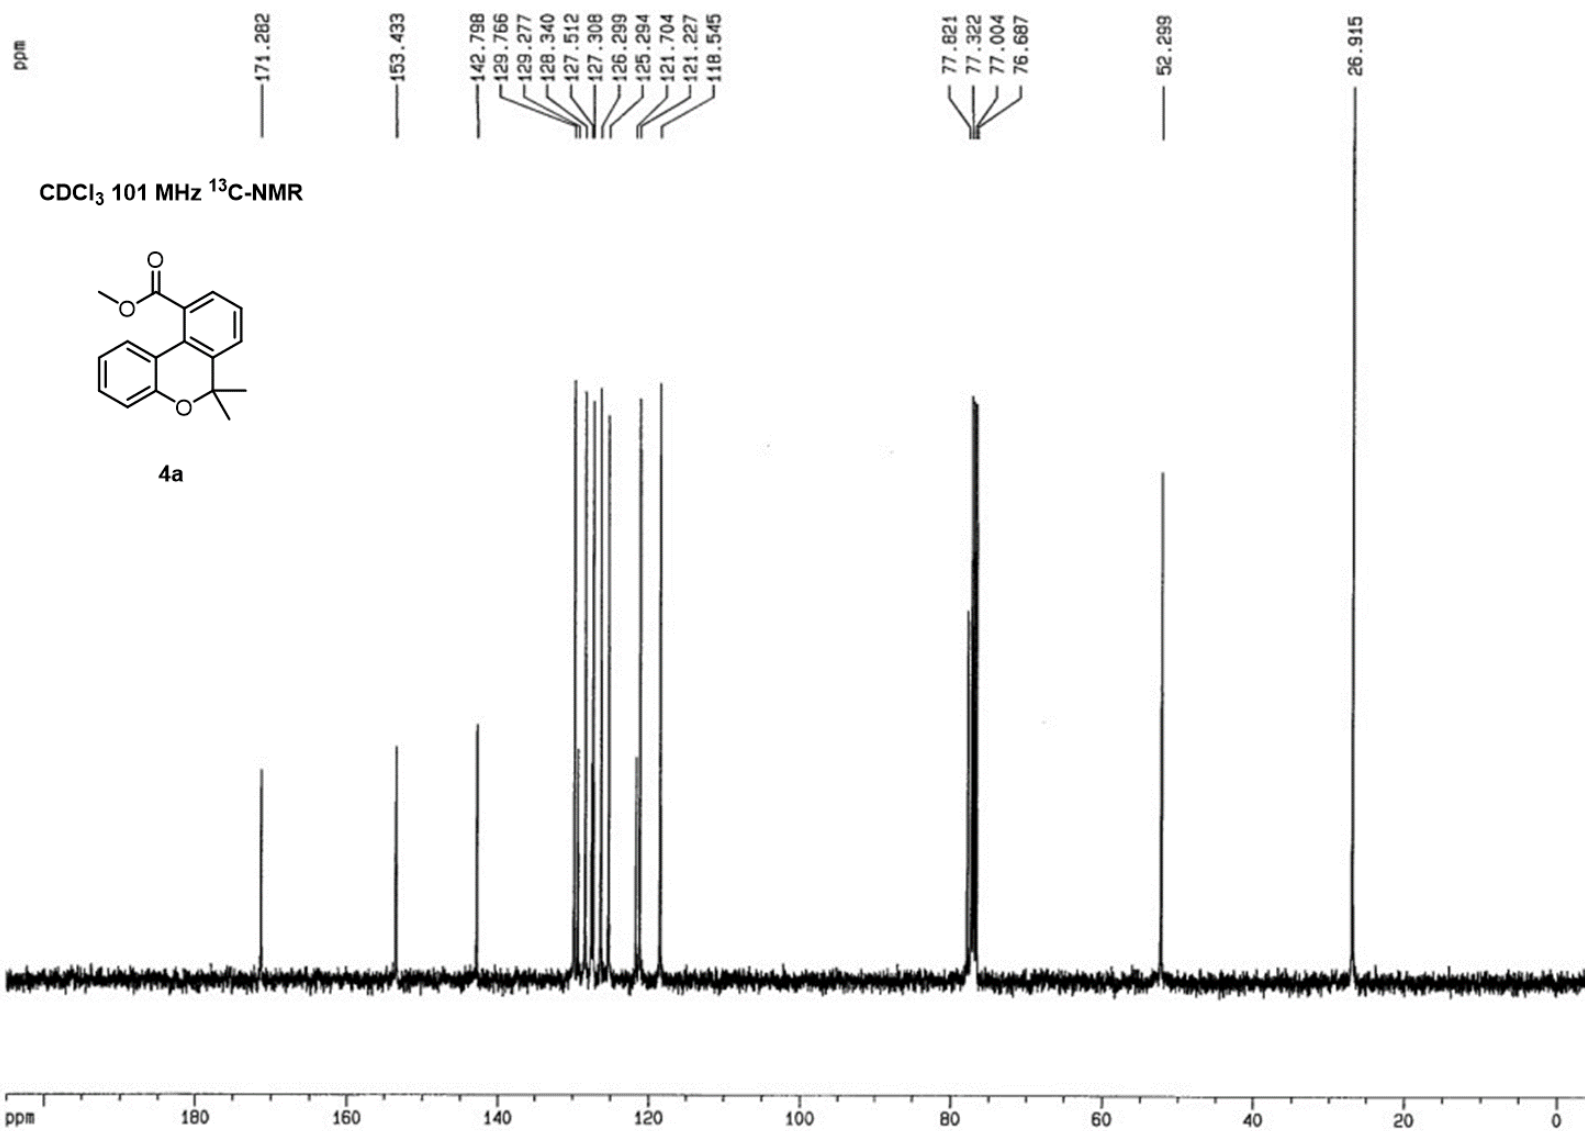

ppm

CDCl<sub>3</sub> 400 MHz <sup>1</sup>H-NMR

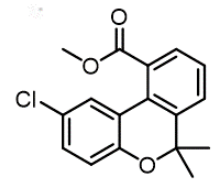

4b

7.37681  
7.37105  
7.36271  
7.24368  
6.94870  
6.92726

3.66418

1.58885

Integral

ppm 10 9 8 7 6 5 4 3 2 1 0

1.0000  
1.9720  
0.8526  
1.0054  
1.0187

3.2257

6.8834

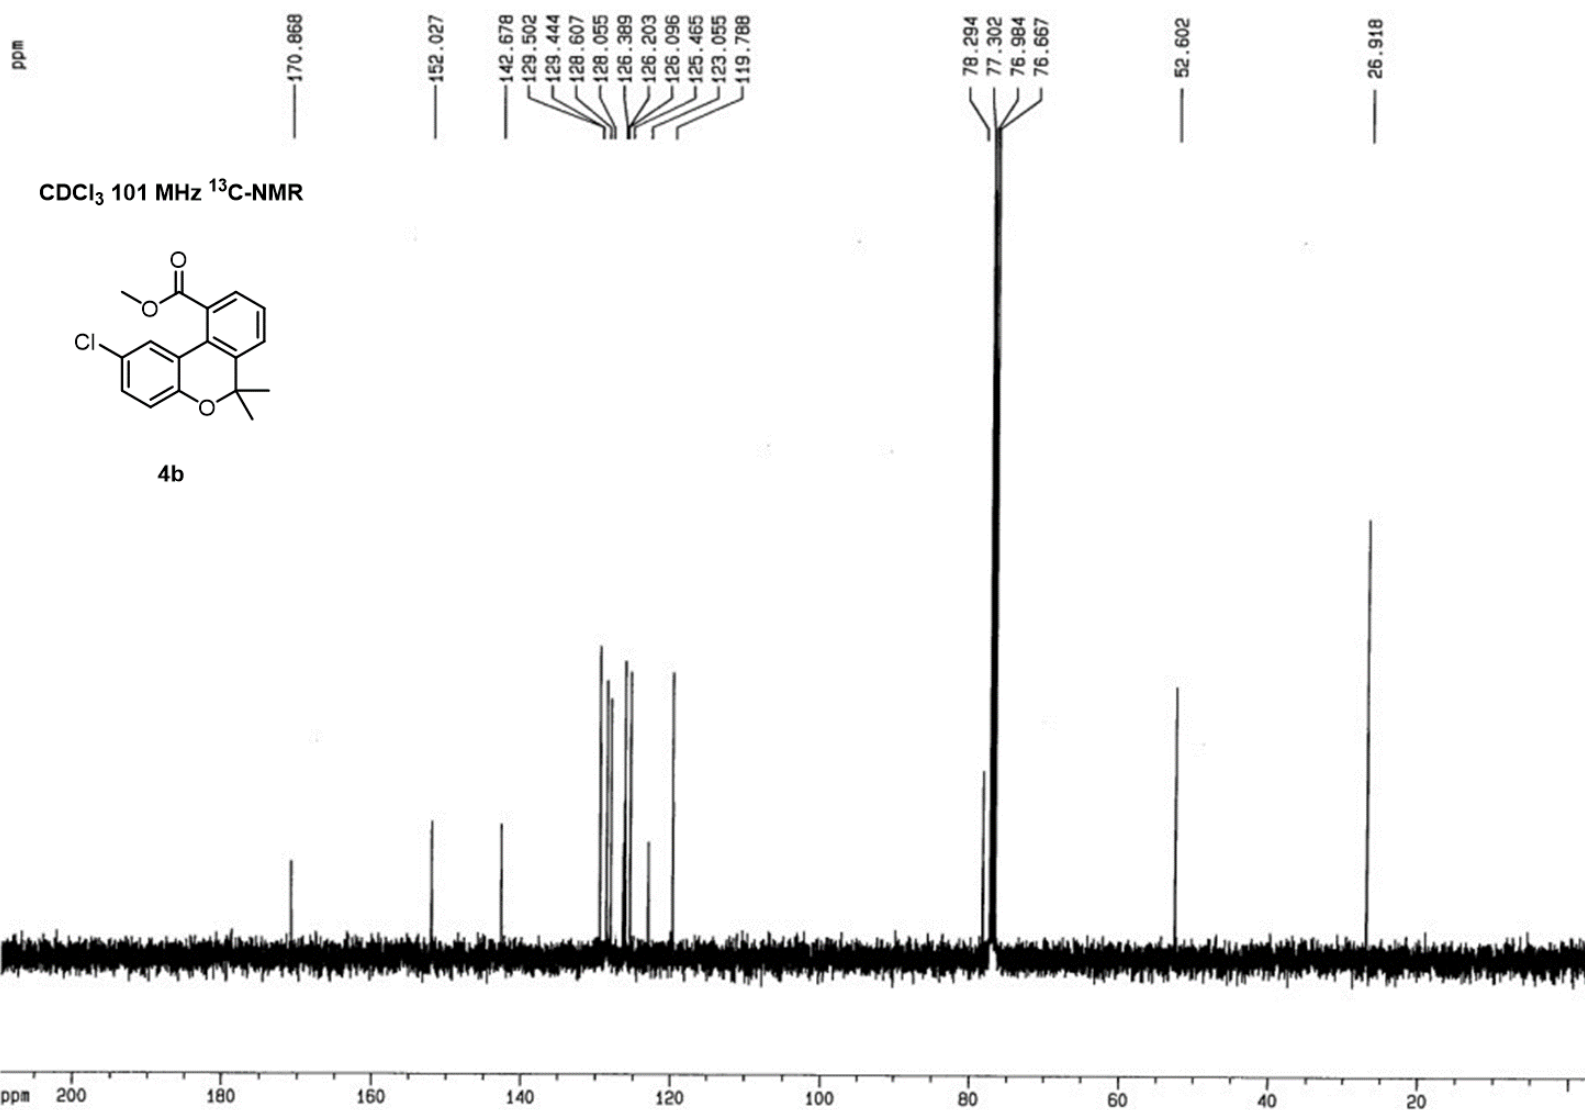

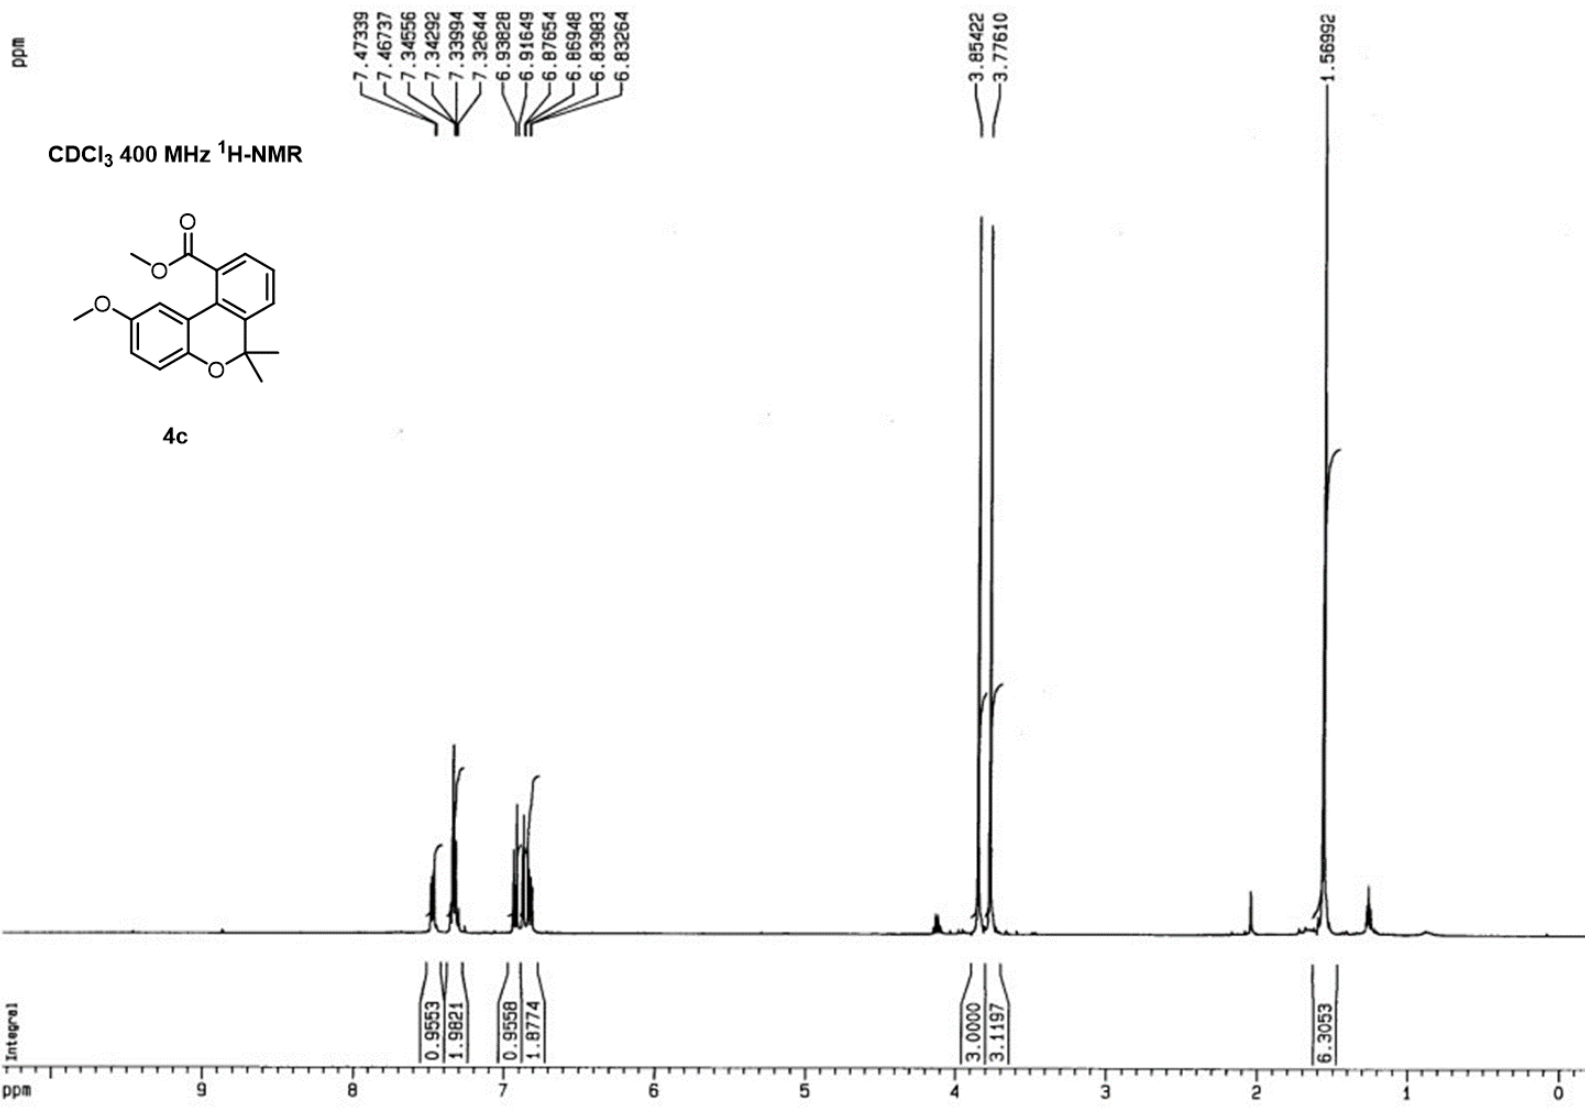



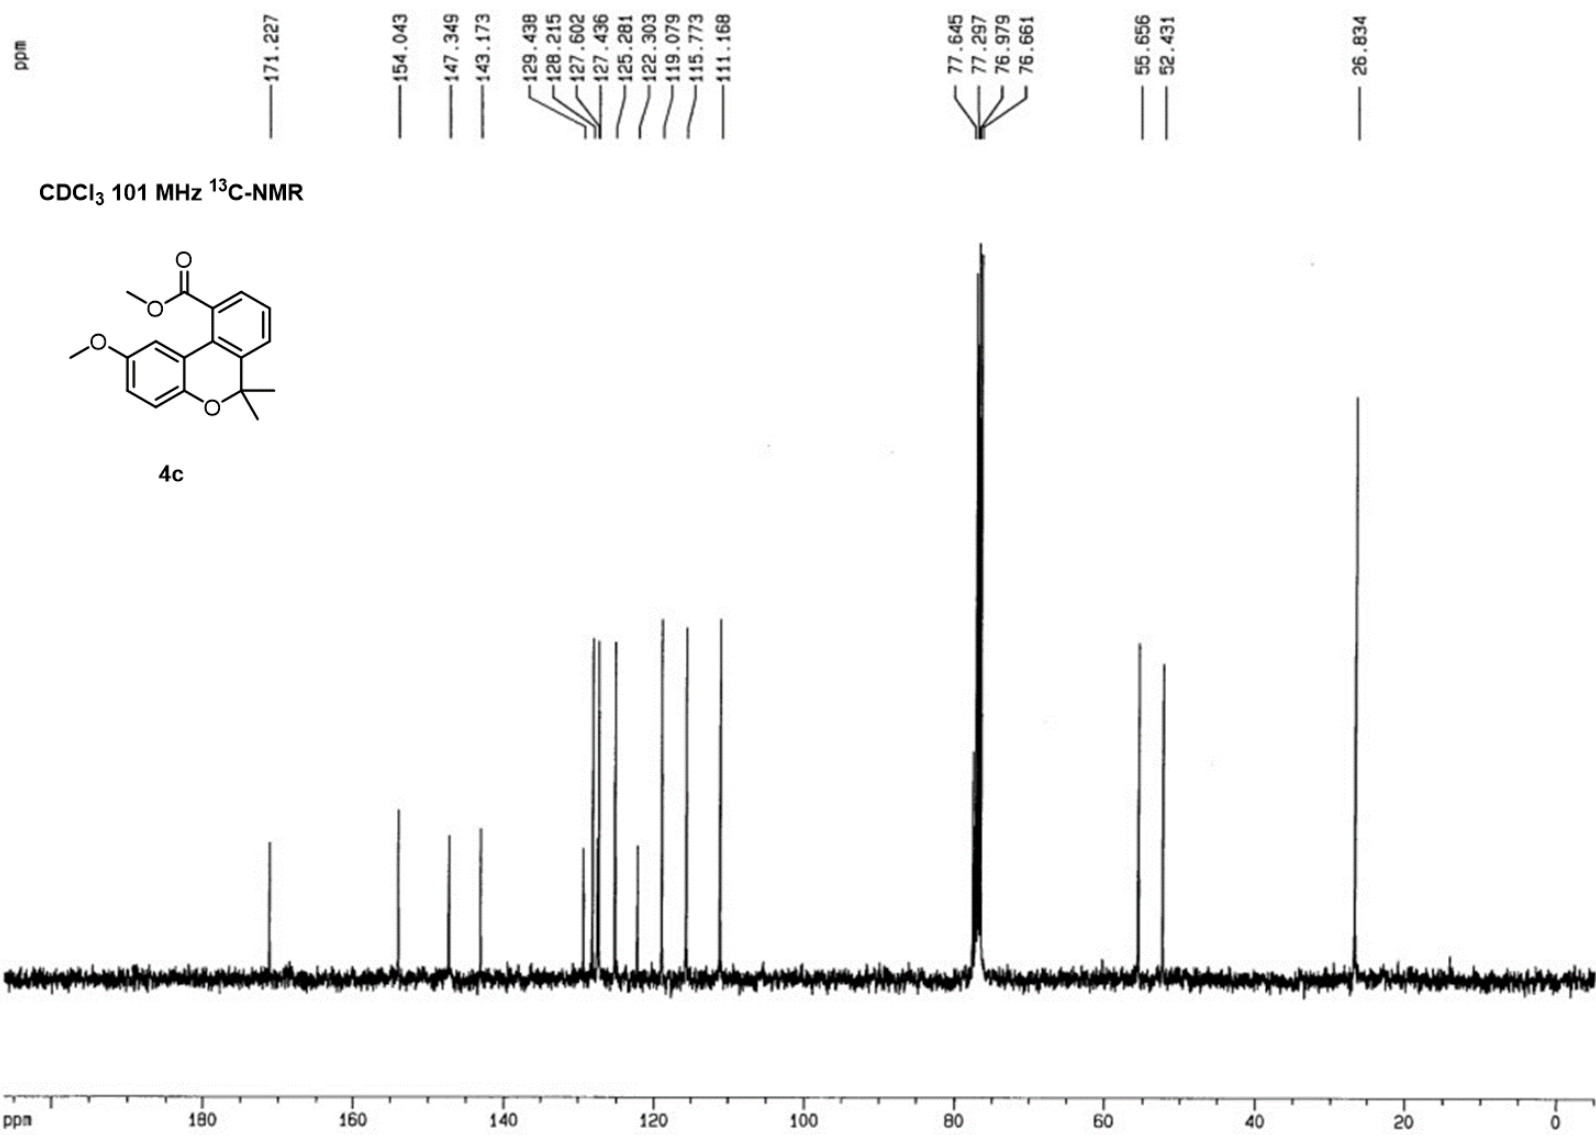

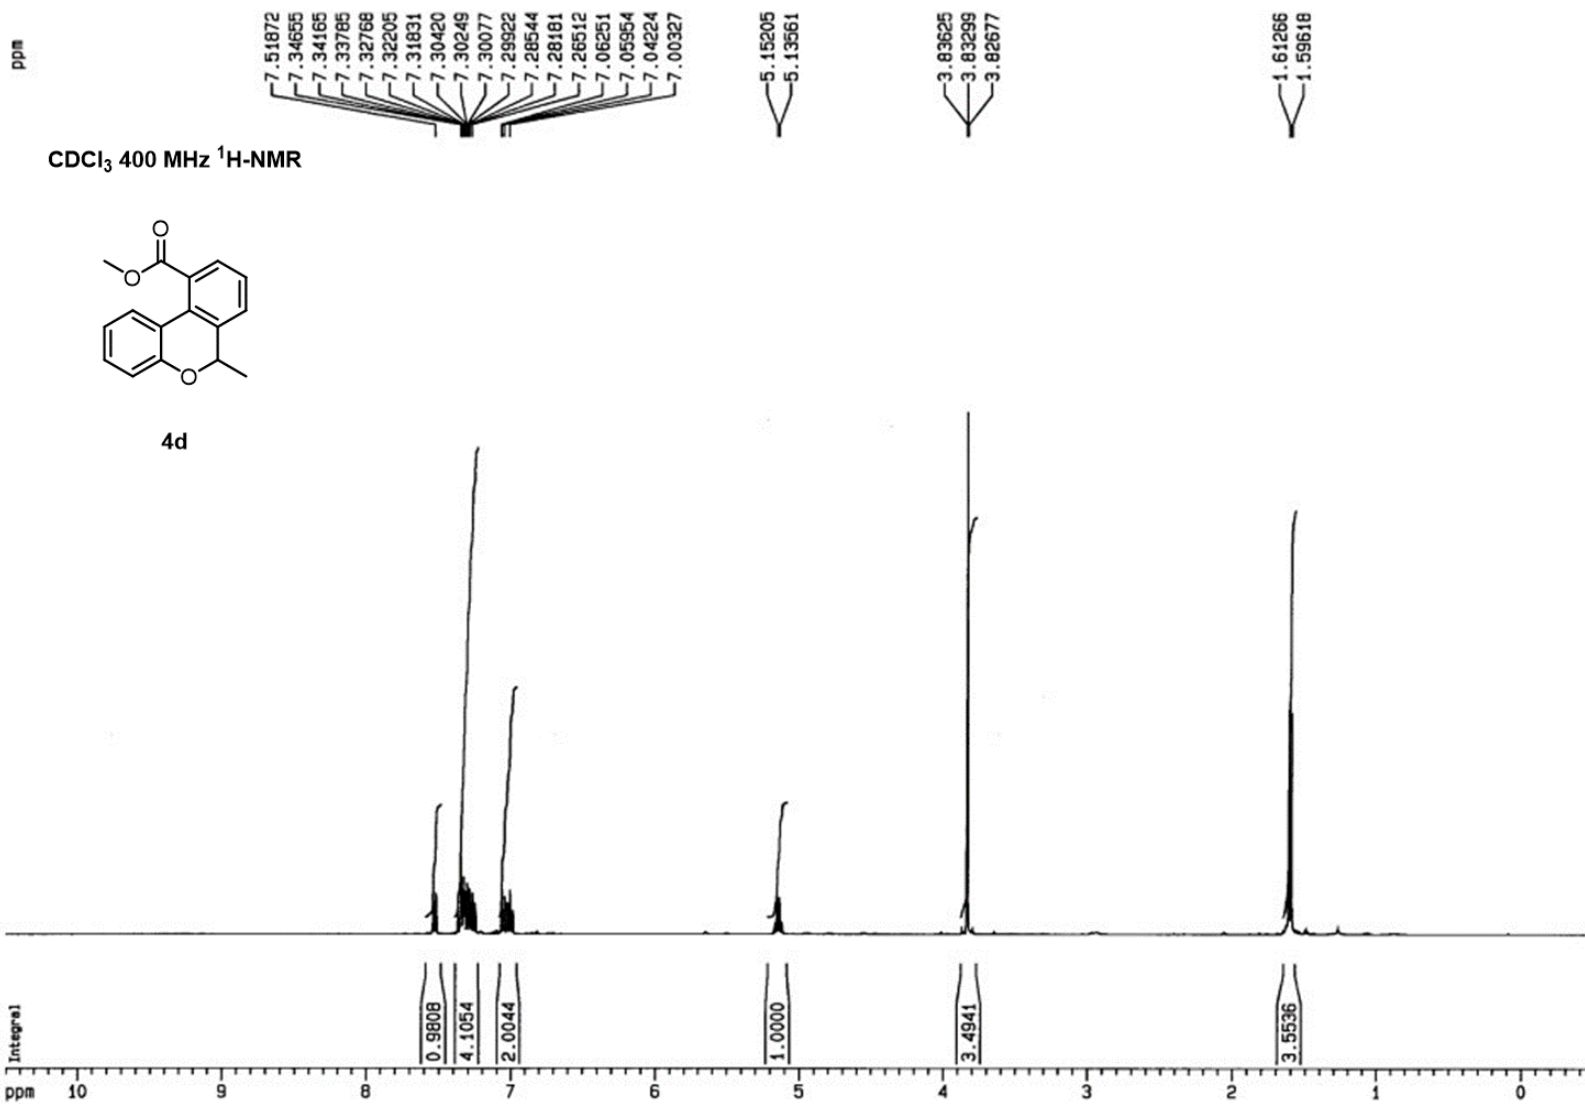

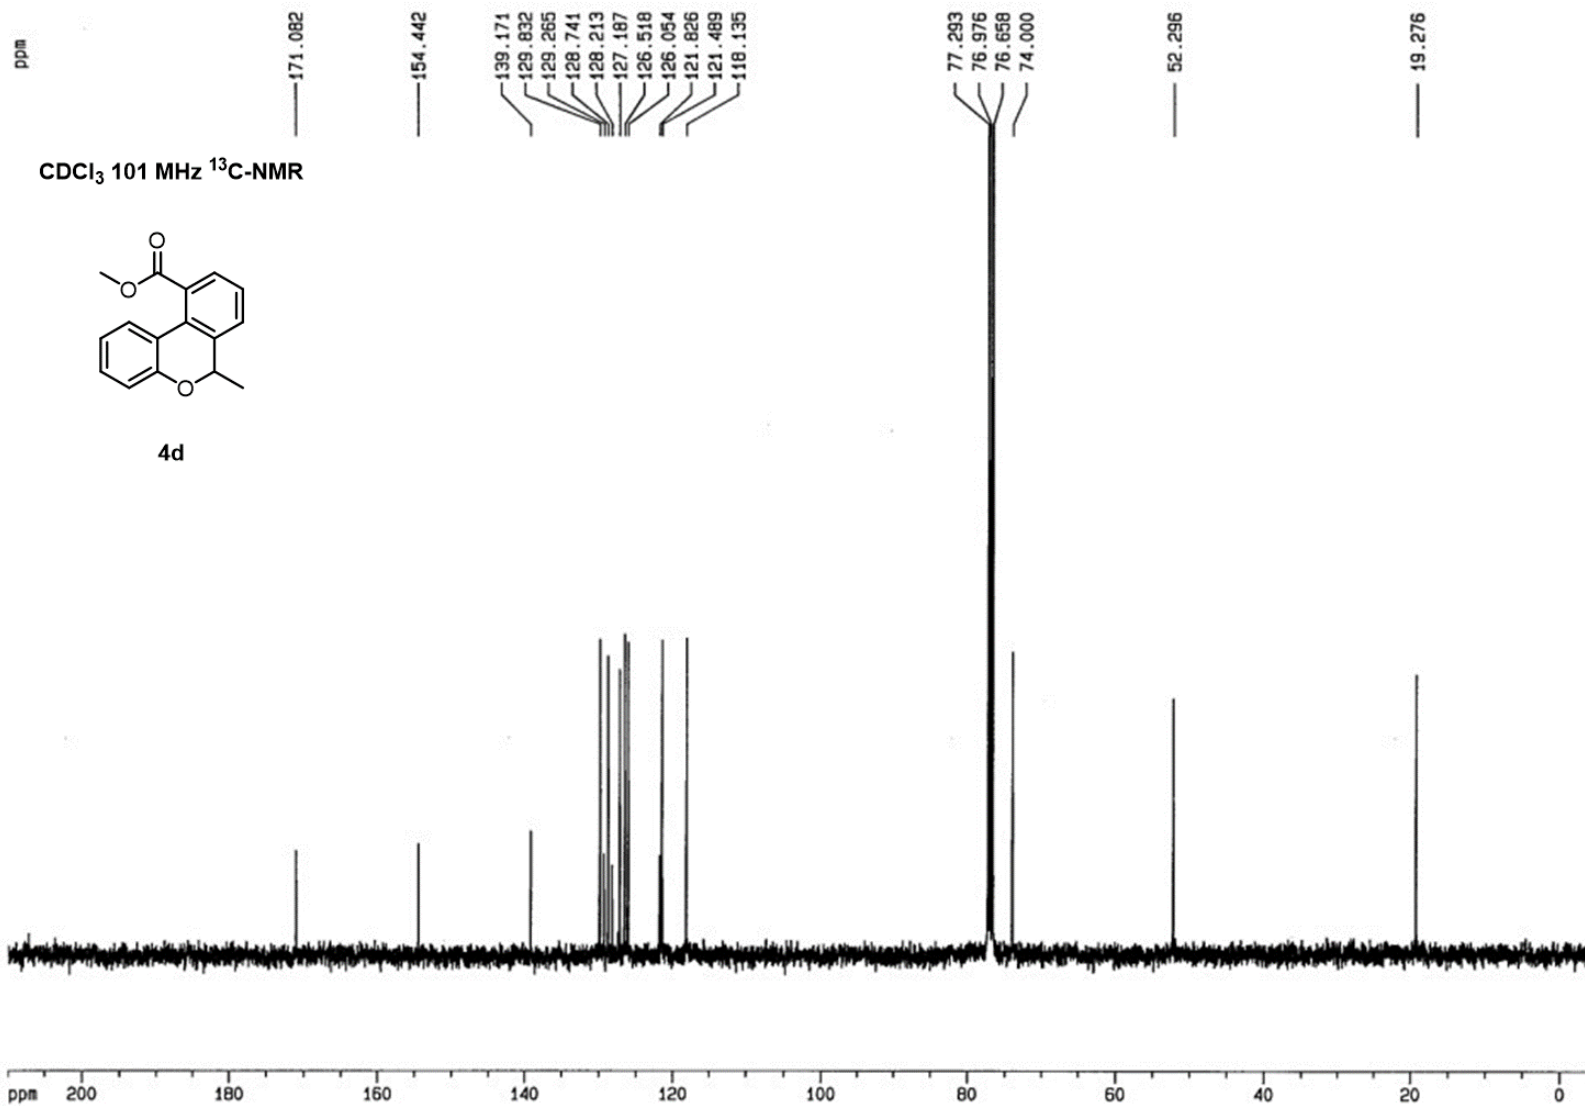

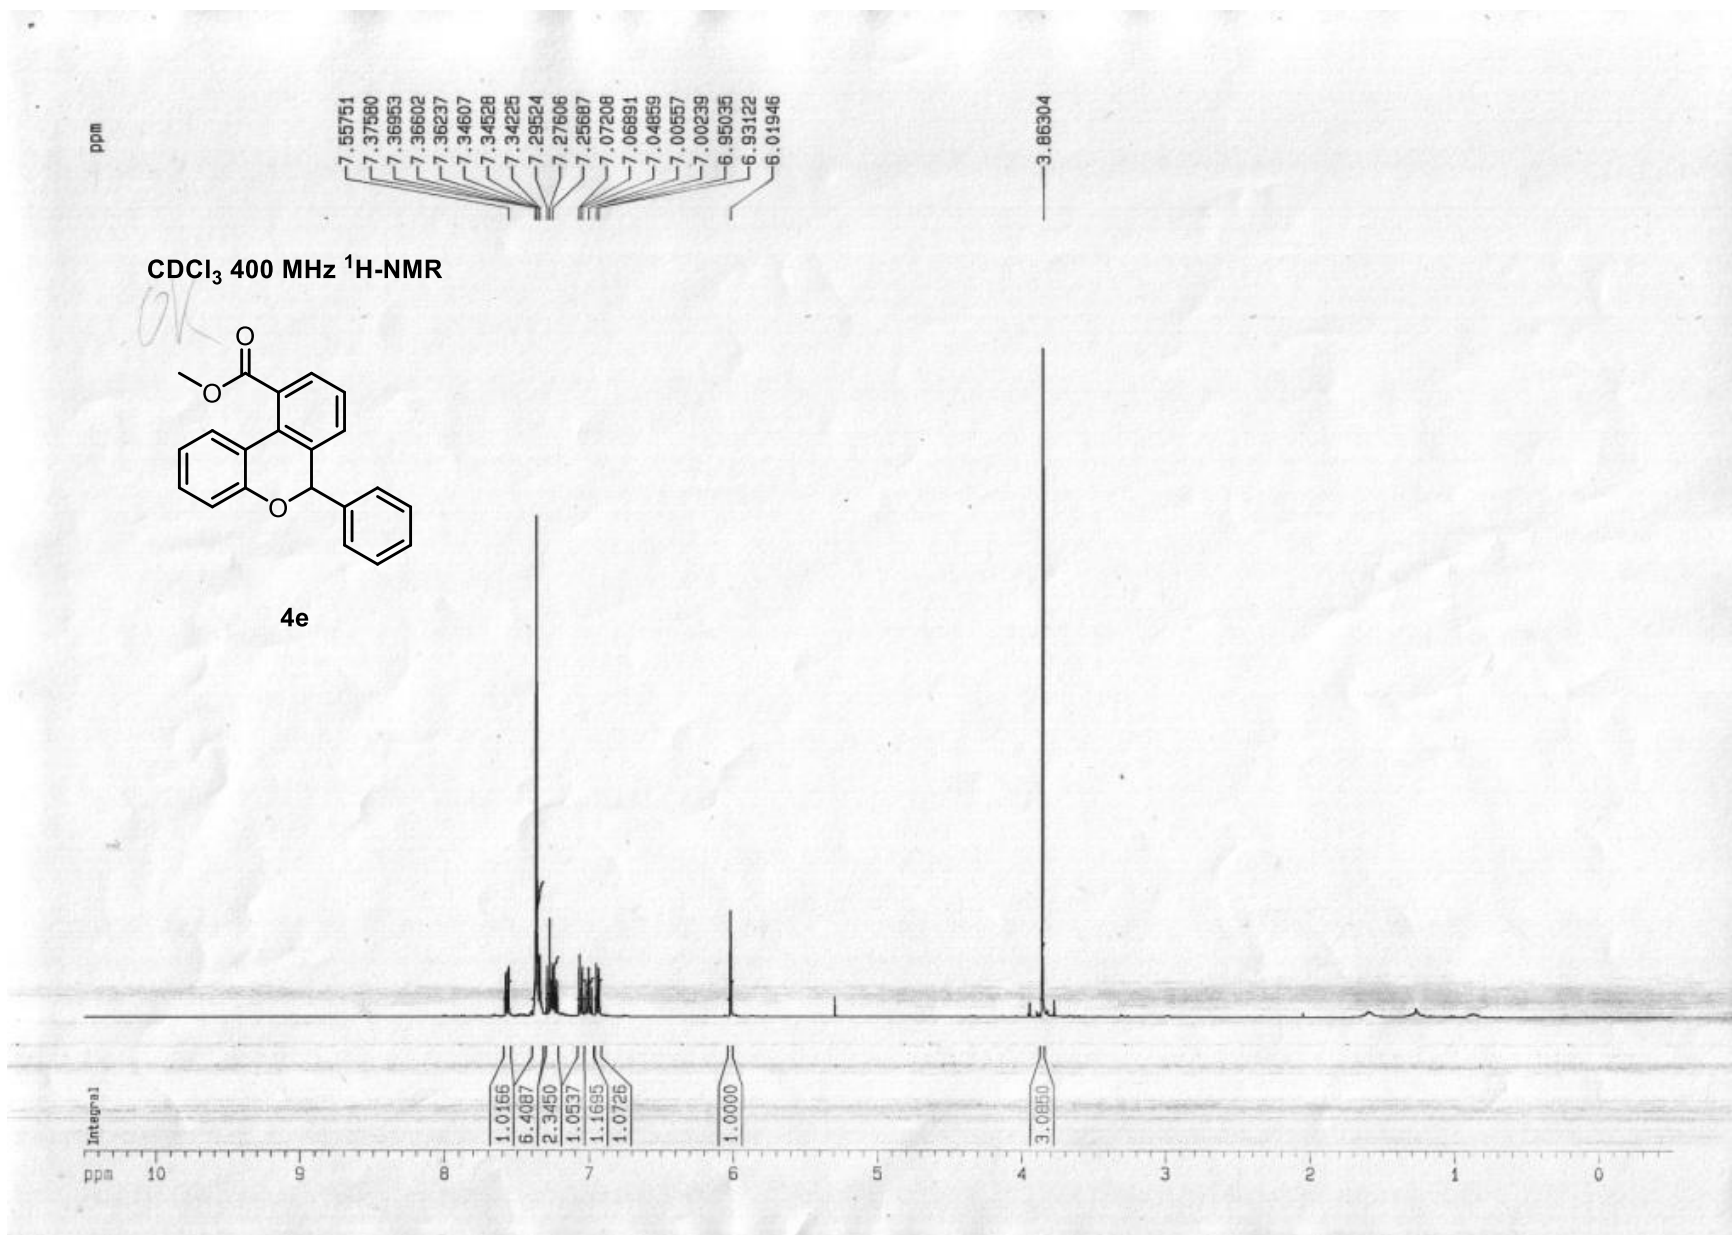

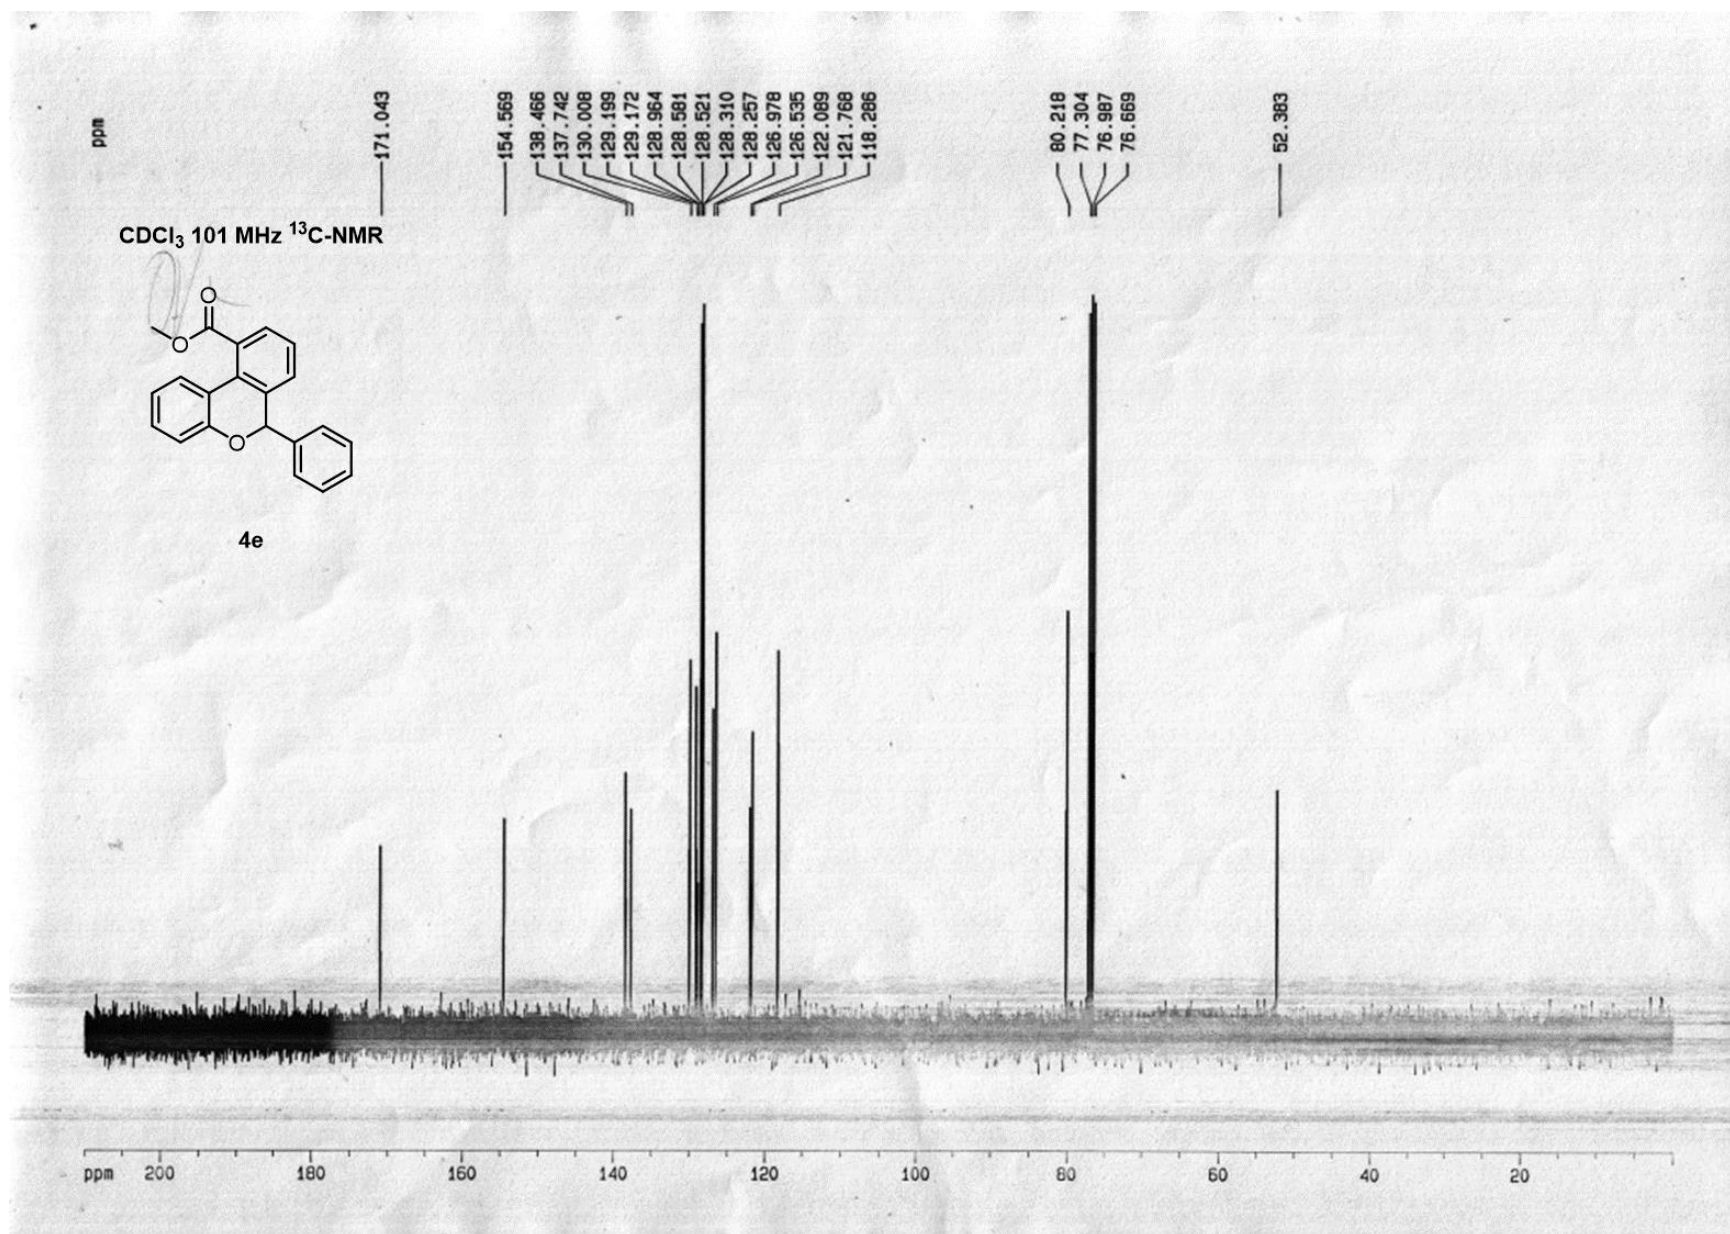

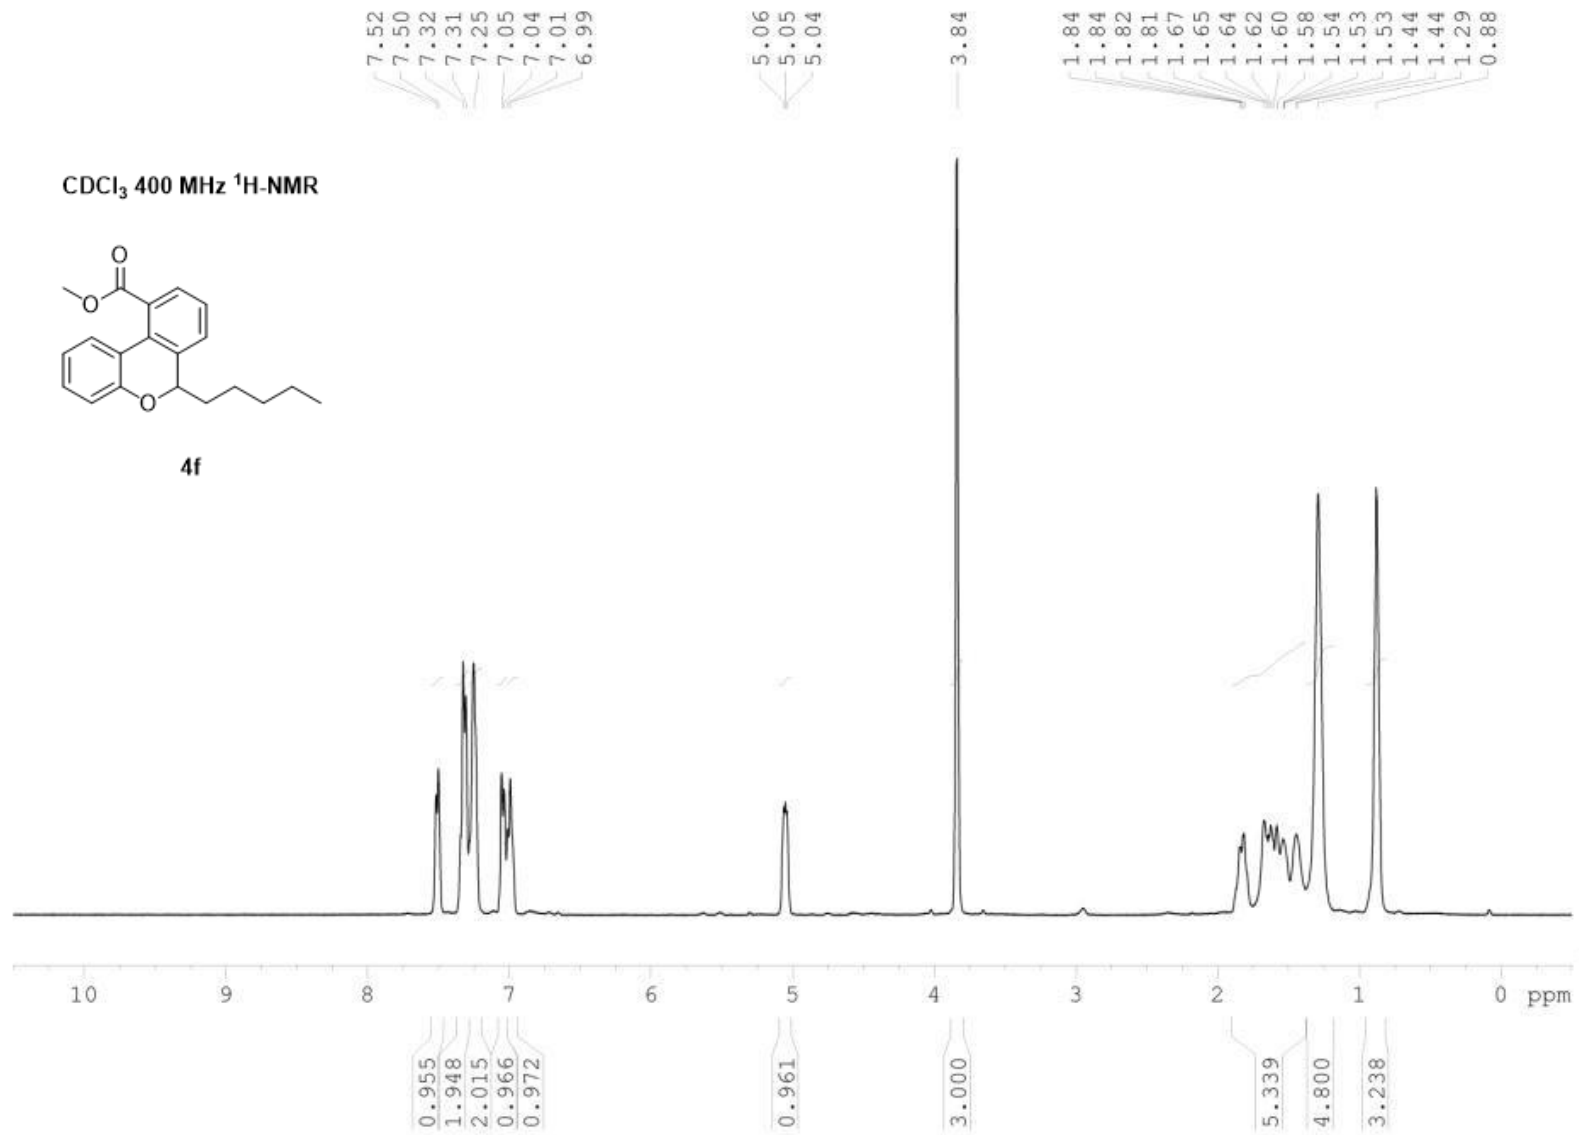

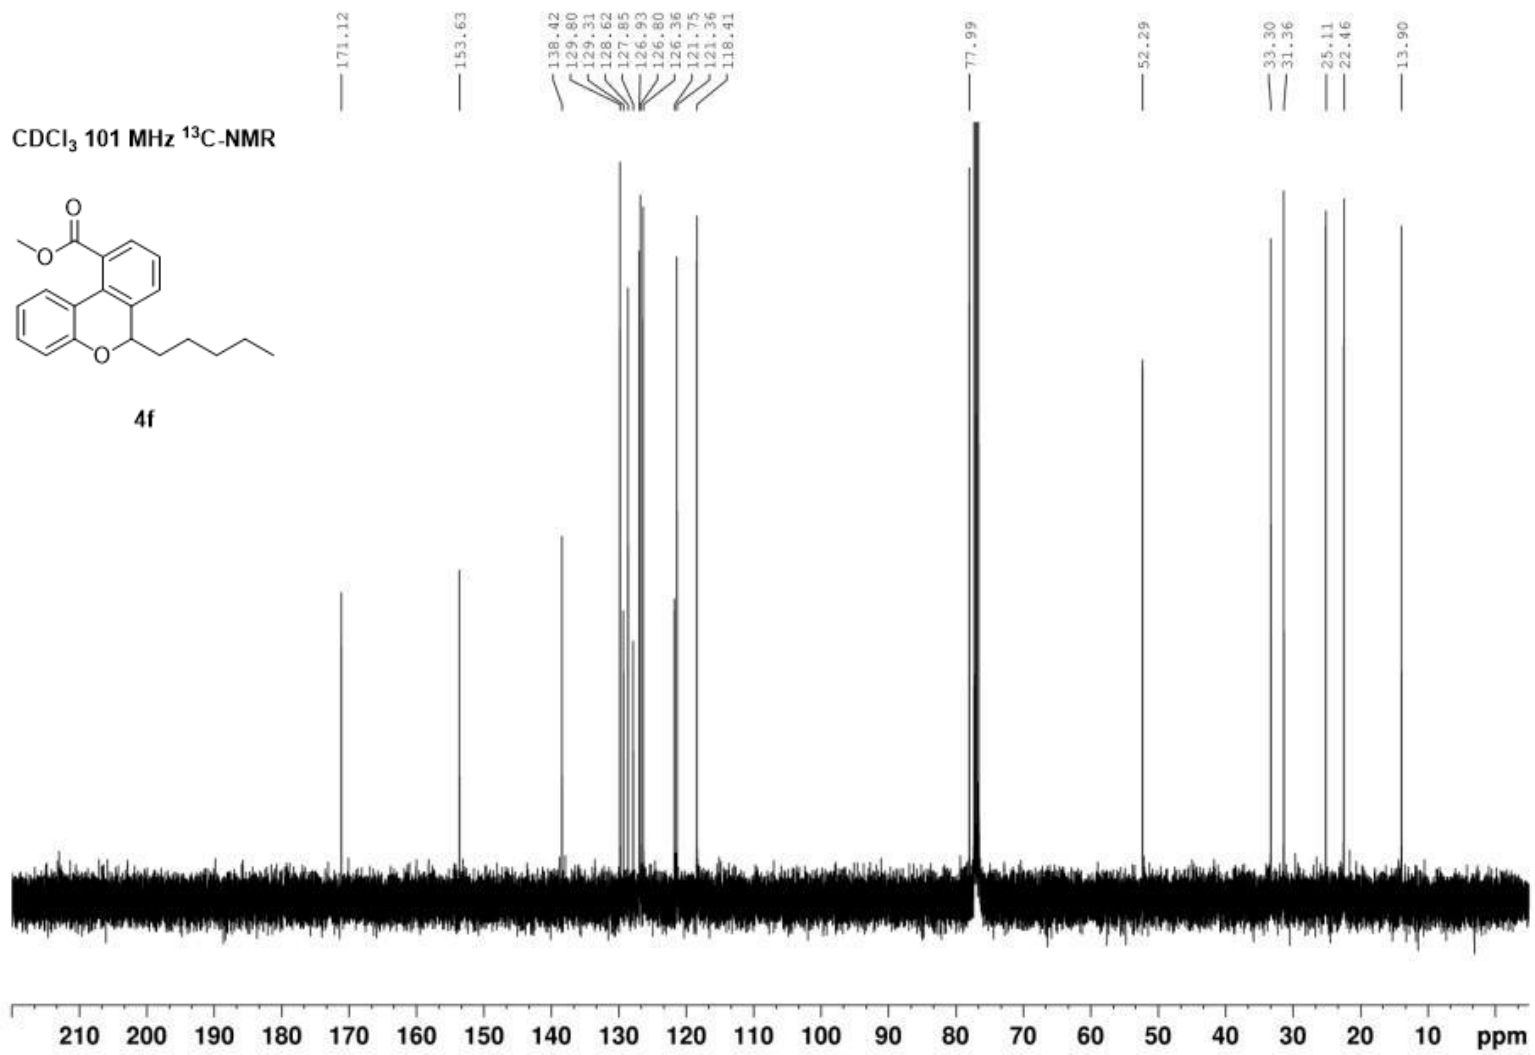

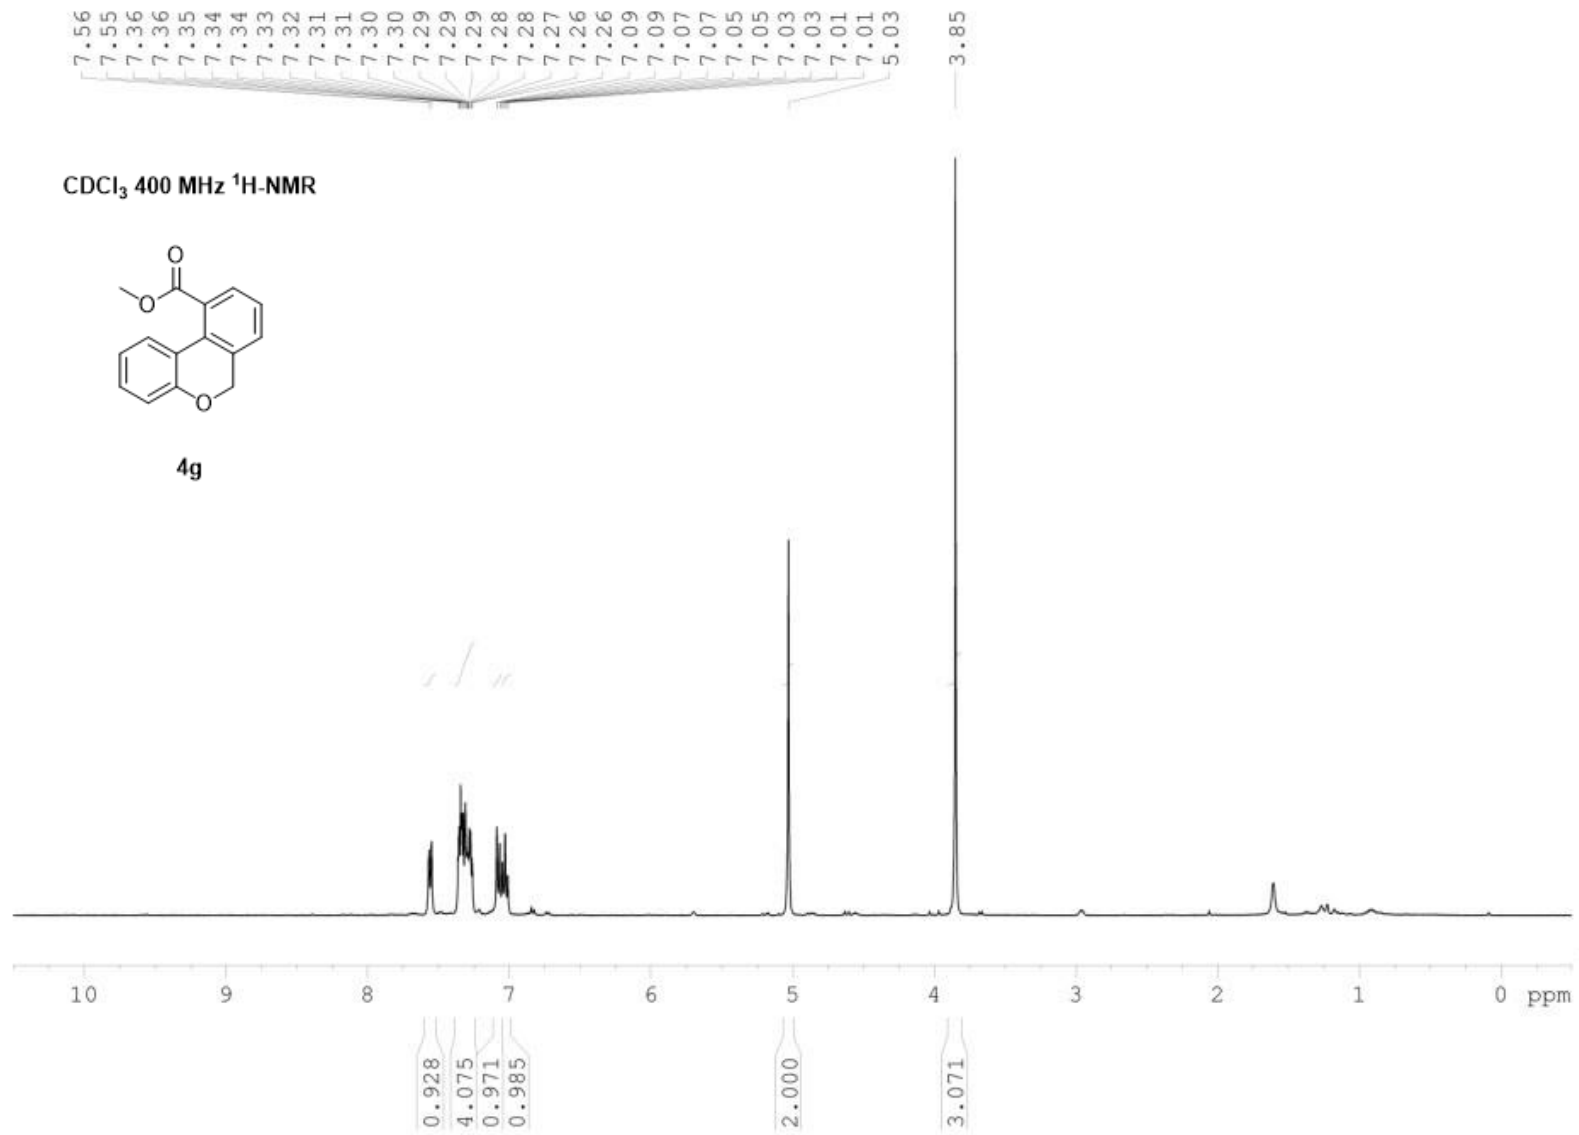



CDCl<sub>3</sub> 101 MHz <sup>13</sup>C-NMR

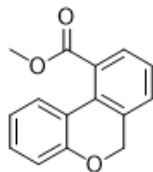

4g

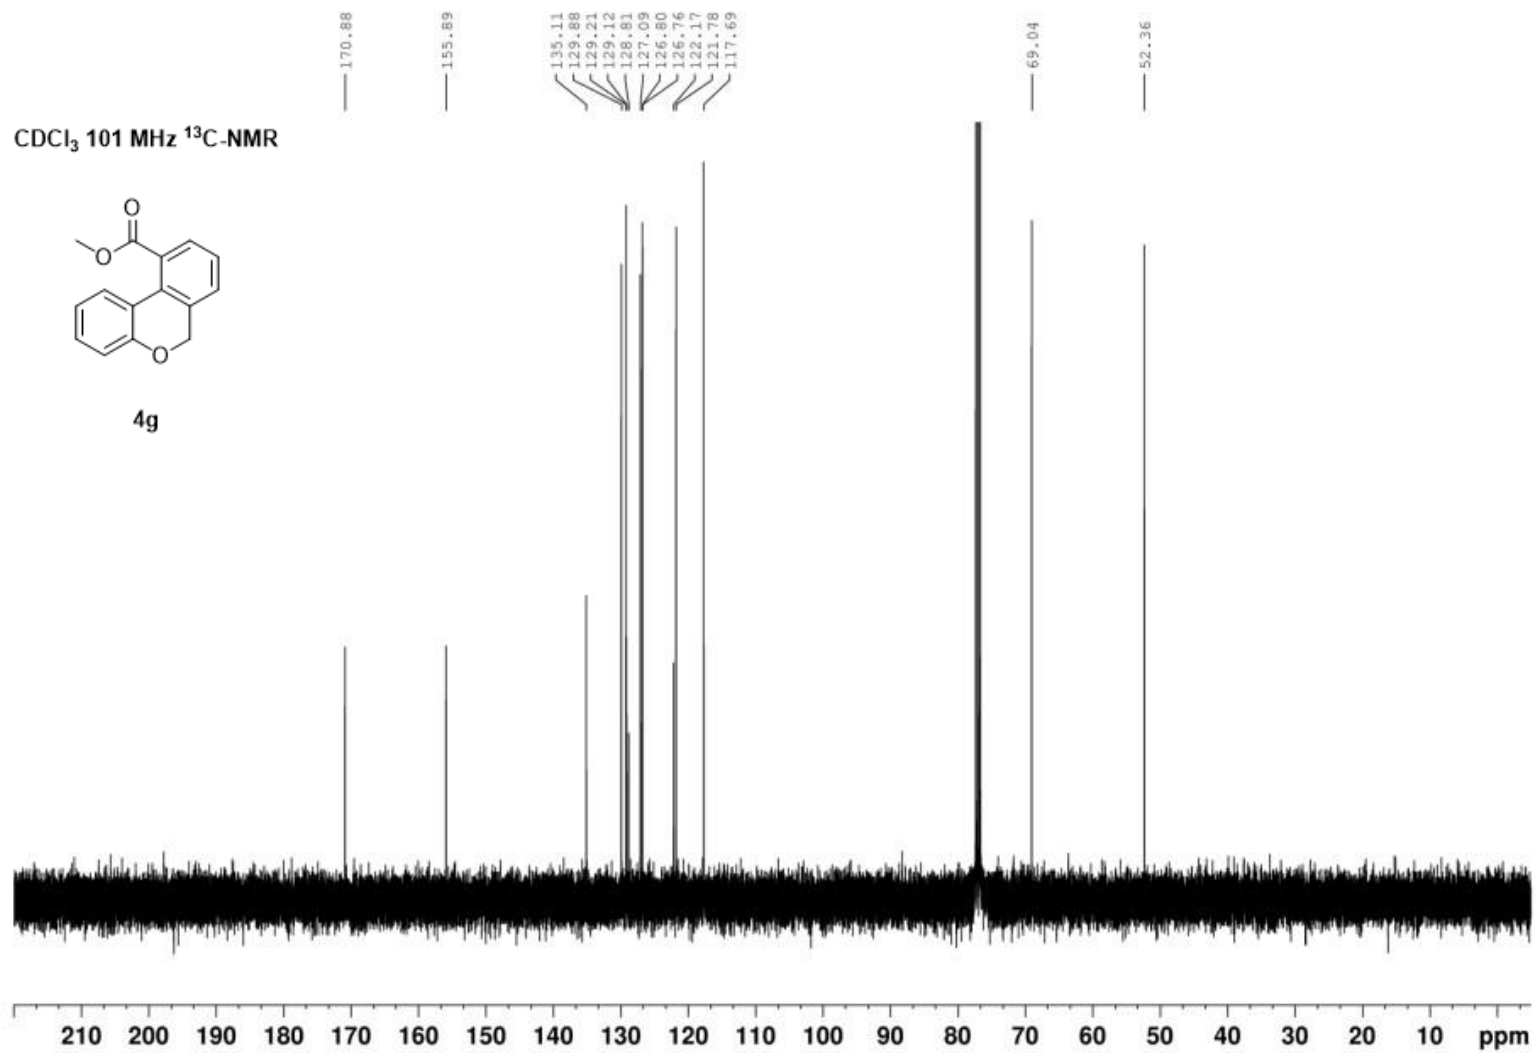

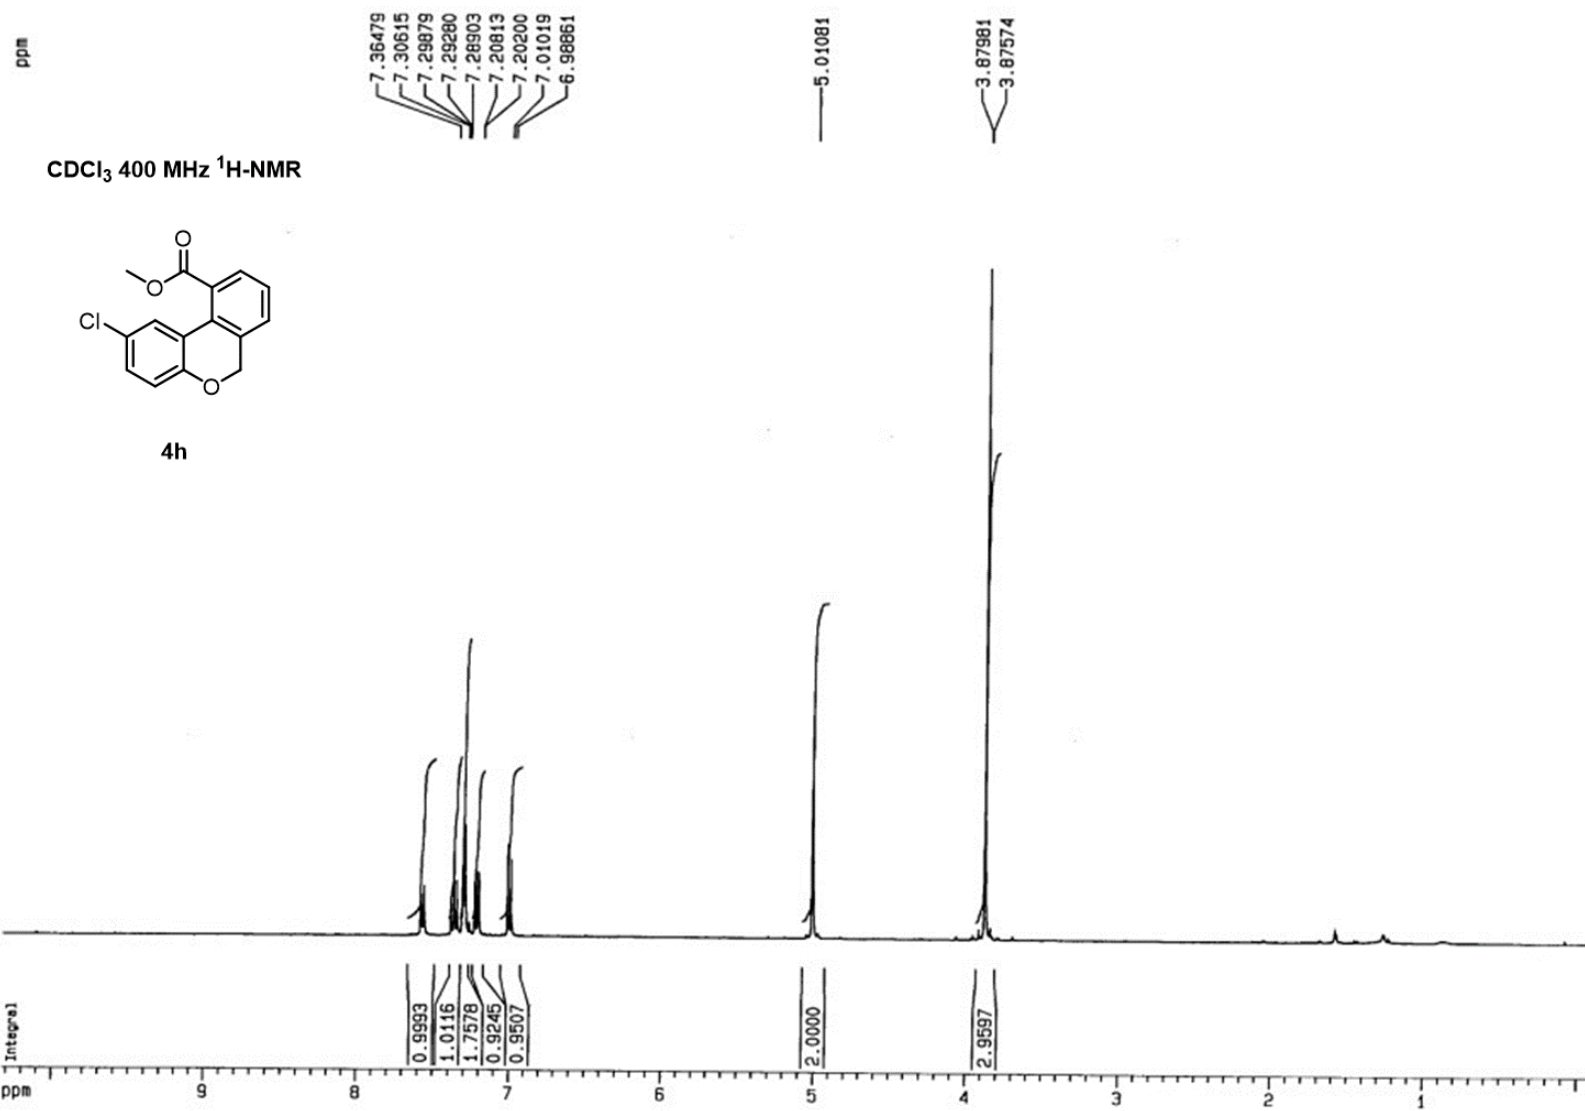

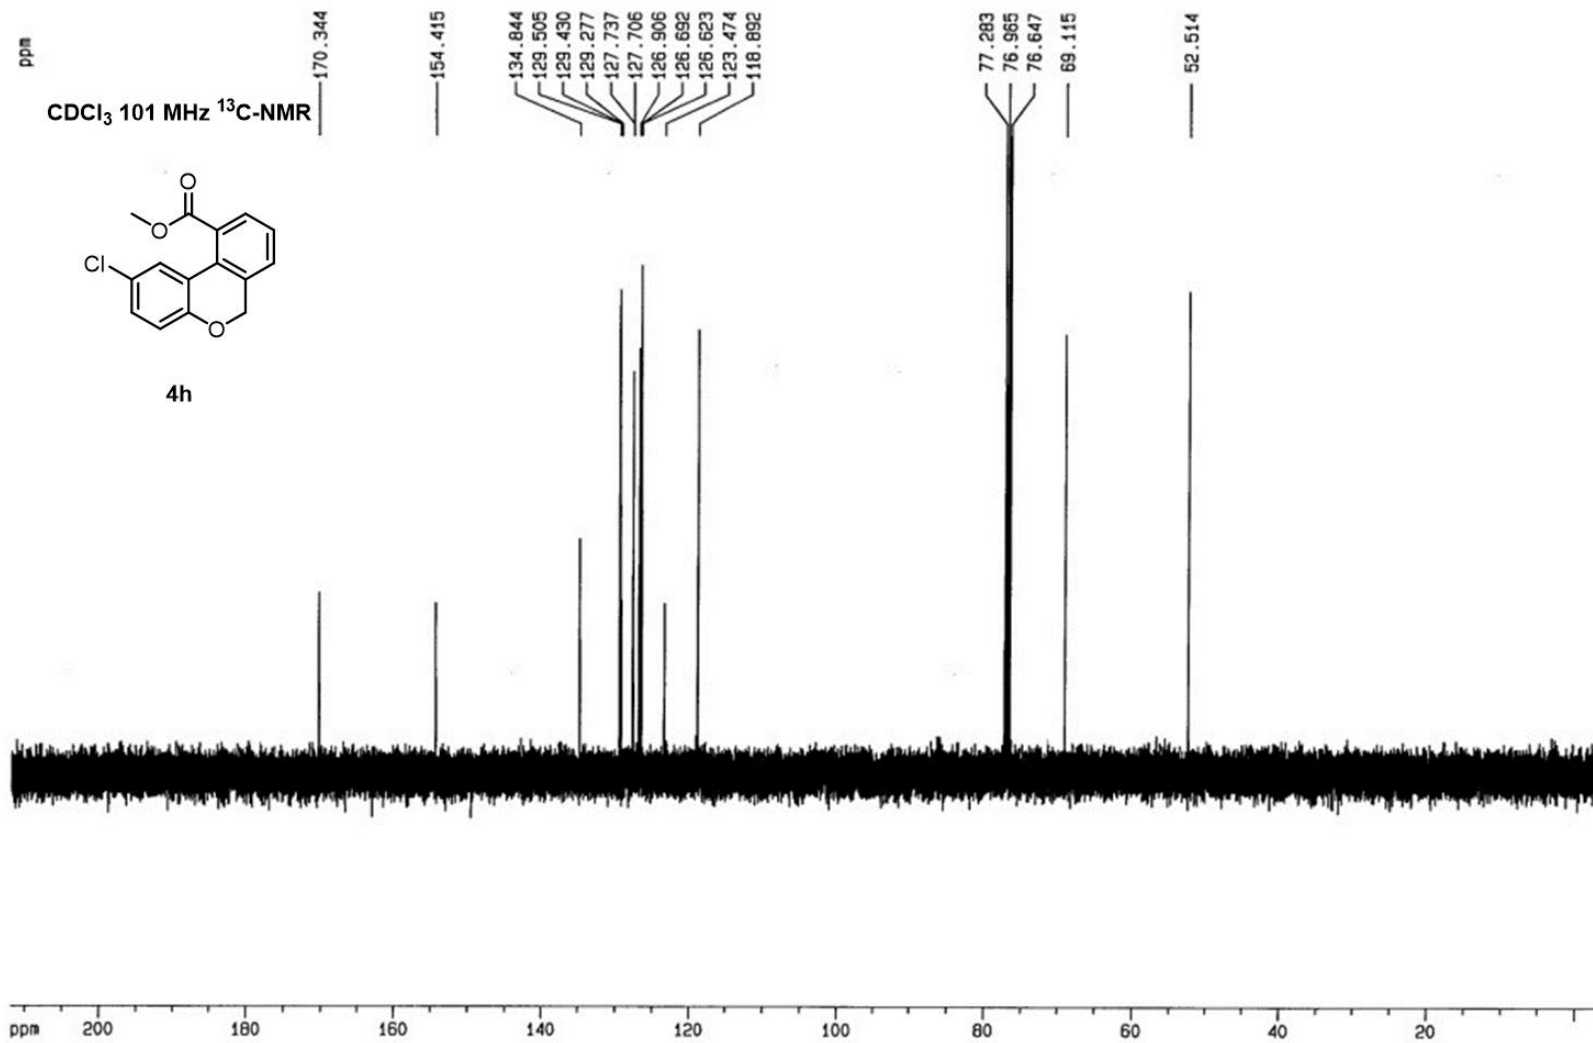

CDCl<sub>3</sub> 400 MHz <sup>1</sup>H-NMR

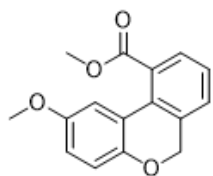

4i

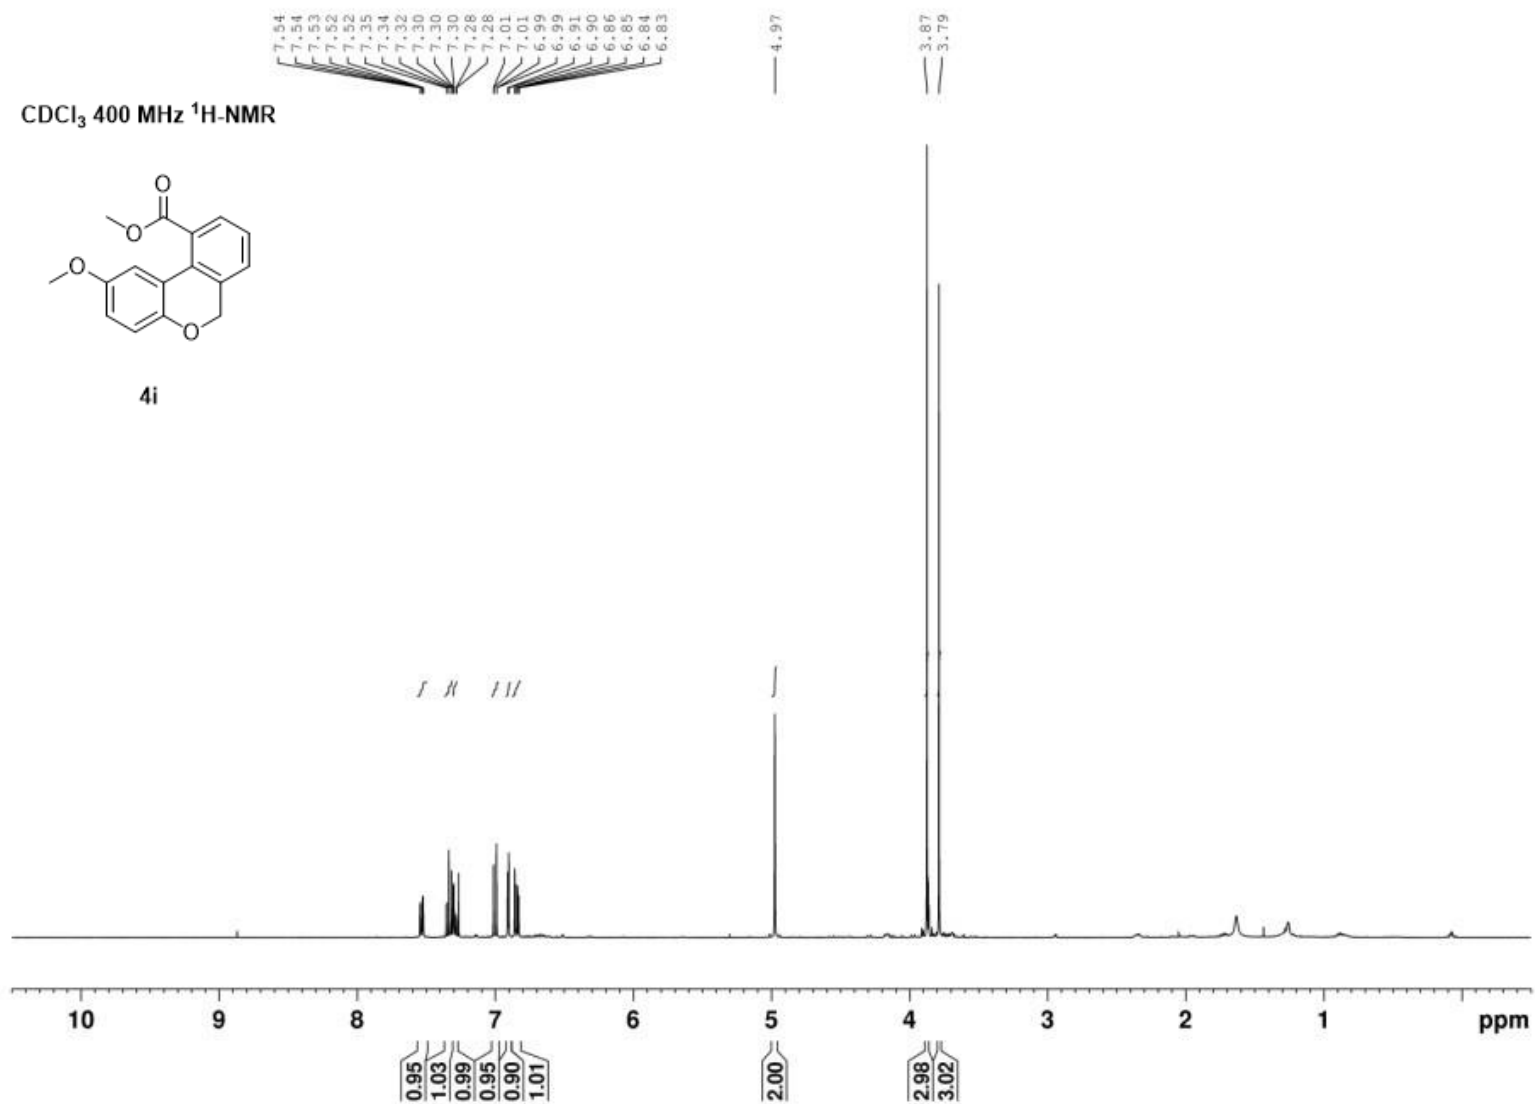

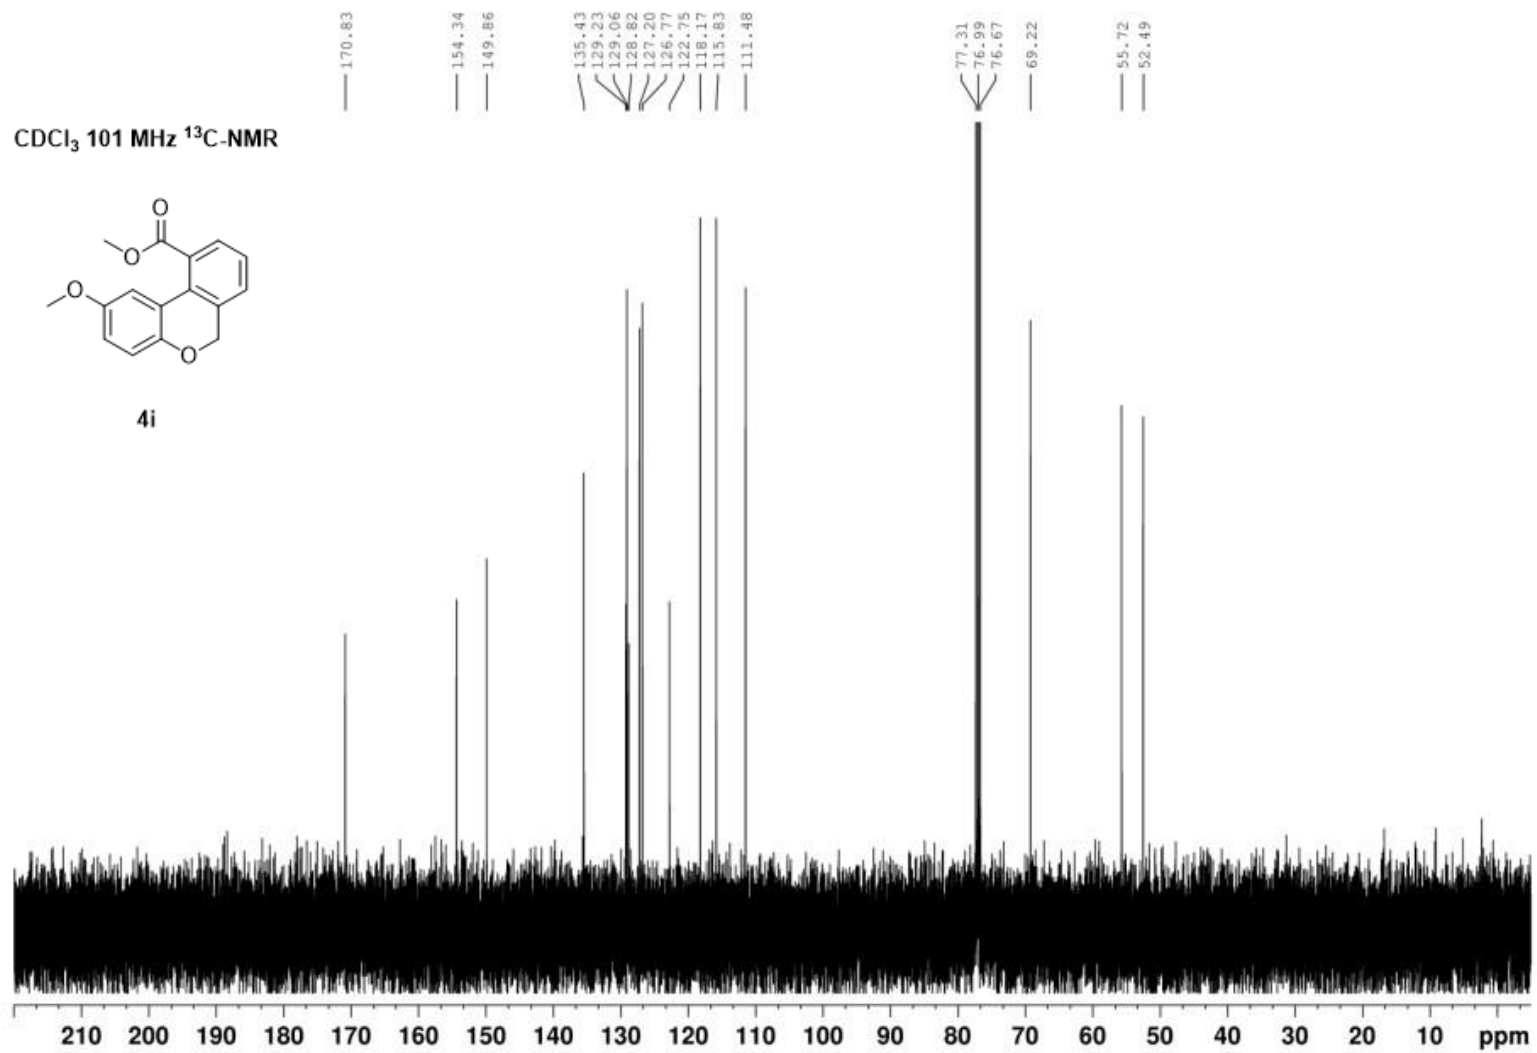

ppm

CDCl<sub>3</sub> 400 MHz <sup>1</sup>H-NMR

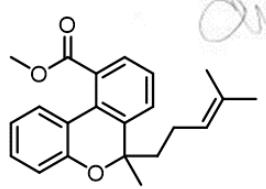

7.50667  
7.50270  
7.49594  
7.49119  
7.33095  
7.31722  
7.28580  
7.26555  
7.24369  
7.22879  
7.22521  
7.02062  
7.00081  
6.98951  
6.96691

5.00091

3.83104

2.04636  
1.86808  
1.87678  
1.72523  
1.66433  
1.62423  
1.50305

Integral

ppm 10 9 8 7 6 5 4 3 2 1 0

0.9872

2.0401

2.0636

2.0028

1.0298

3.0000

2.1256

2.3242

6.9101

3.2115

80000

ppm

CDCl<sub>3</sub> 101 MHz <sup>13</sup>C-NMR

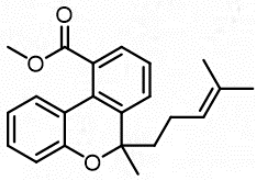

4j

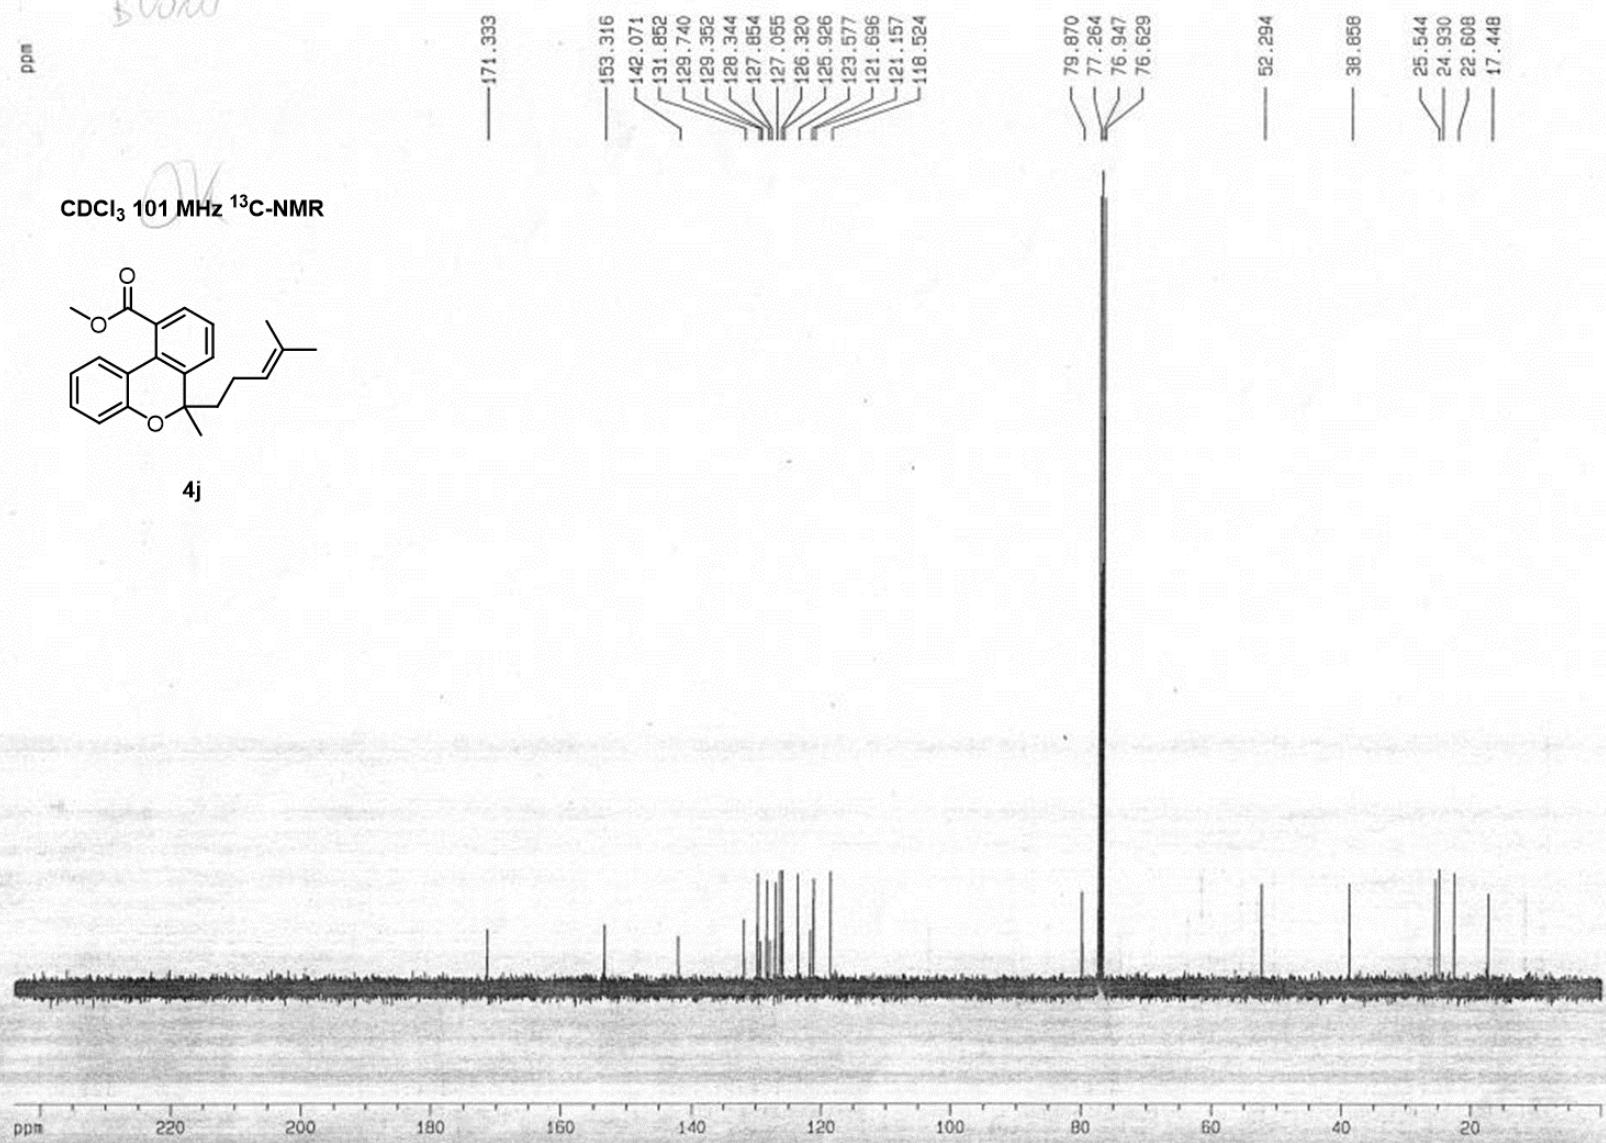

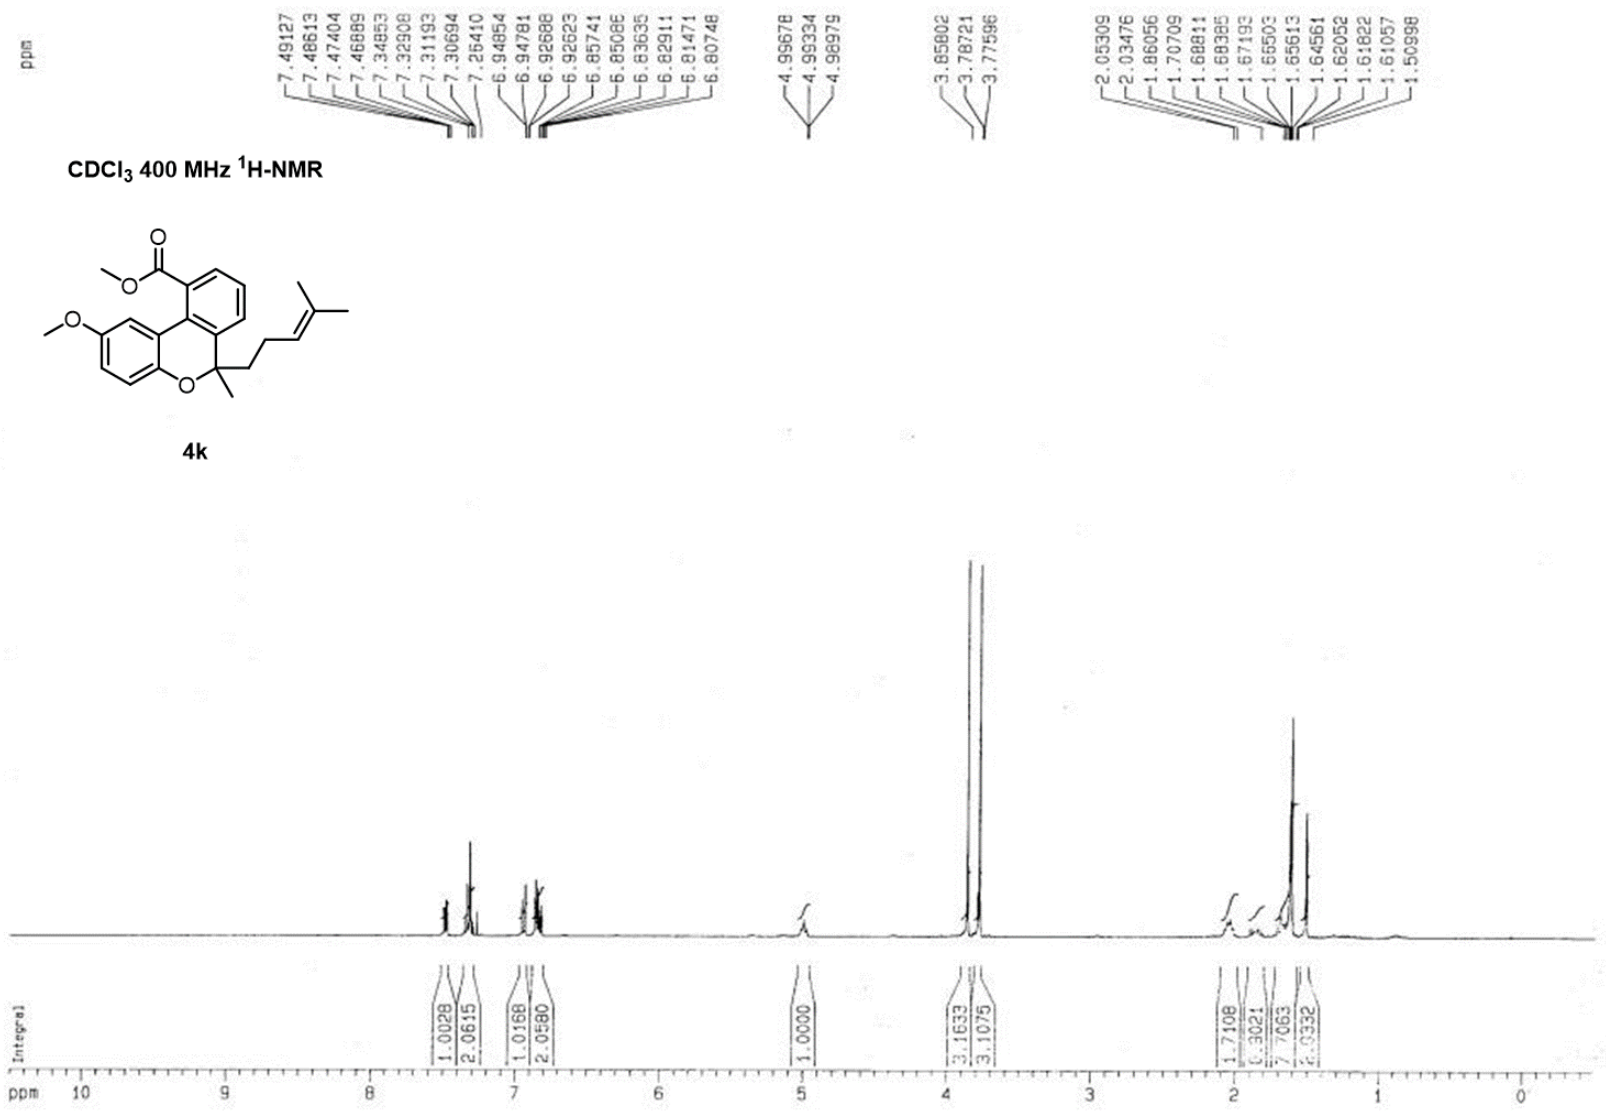



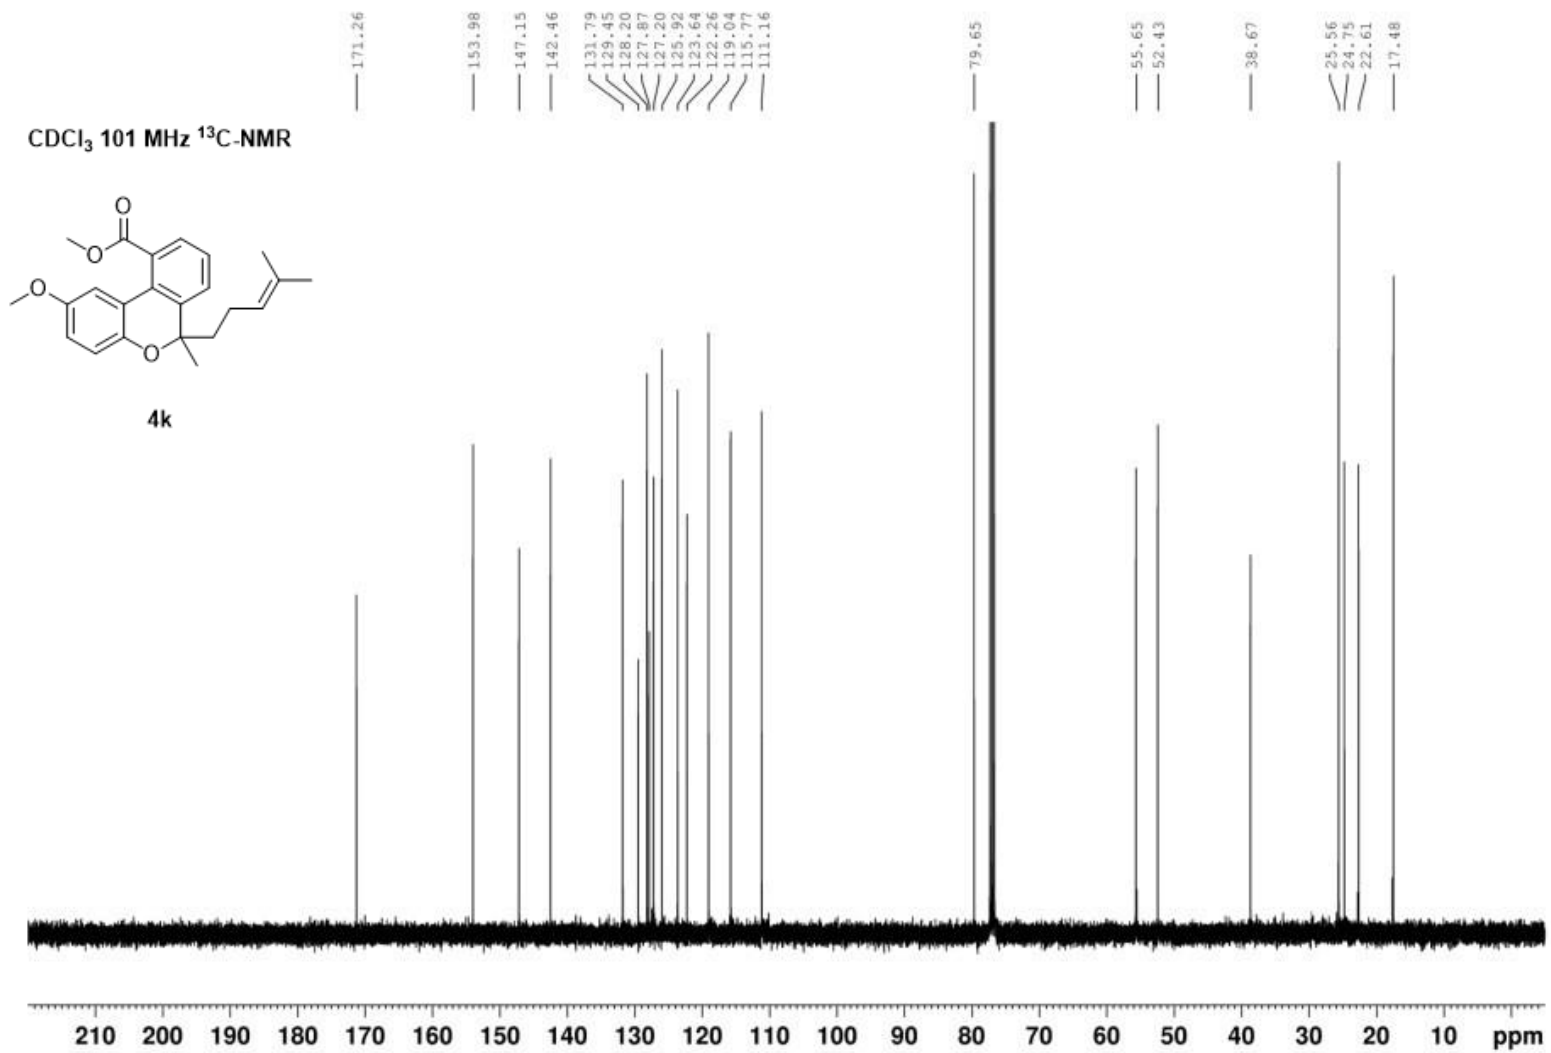

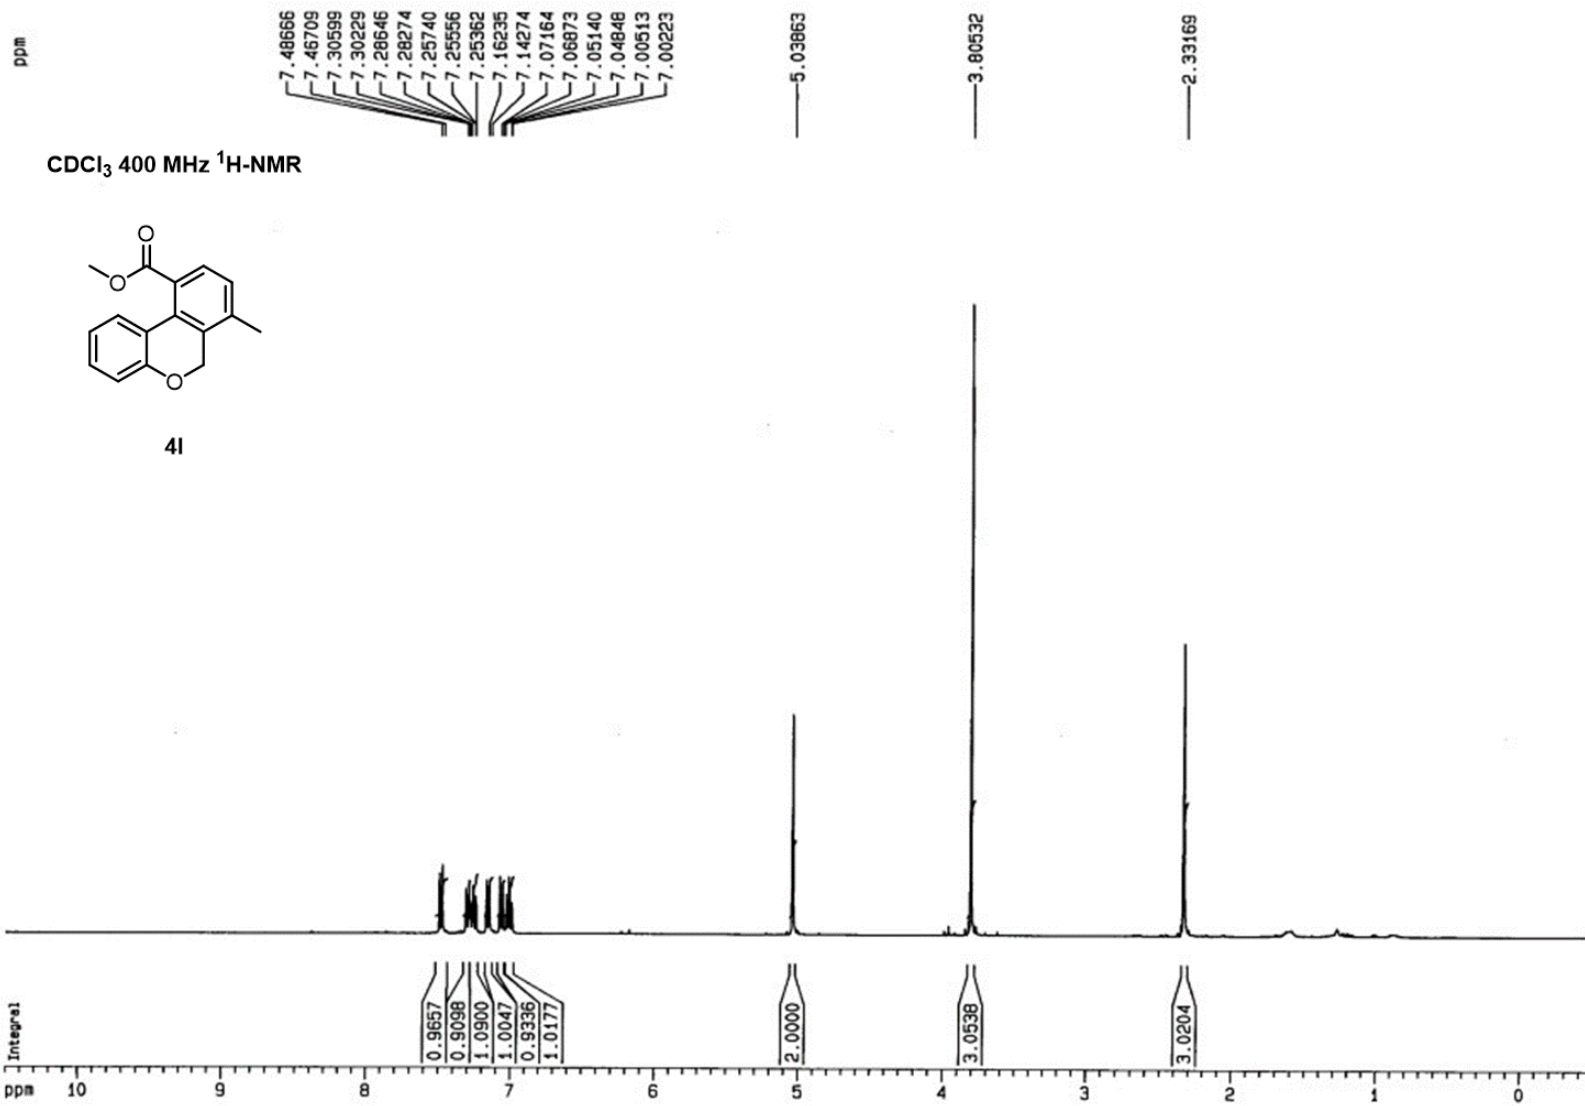

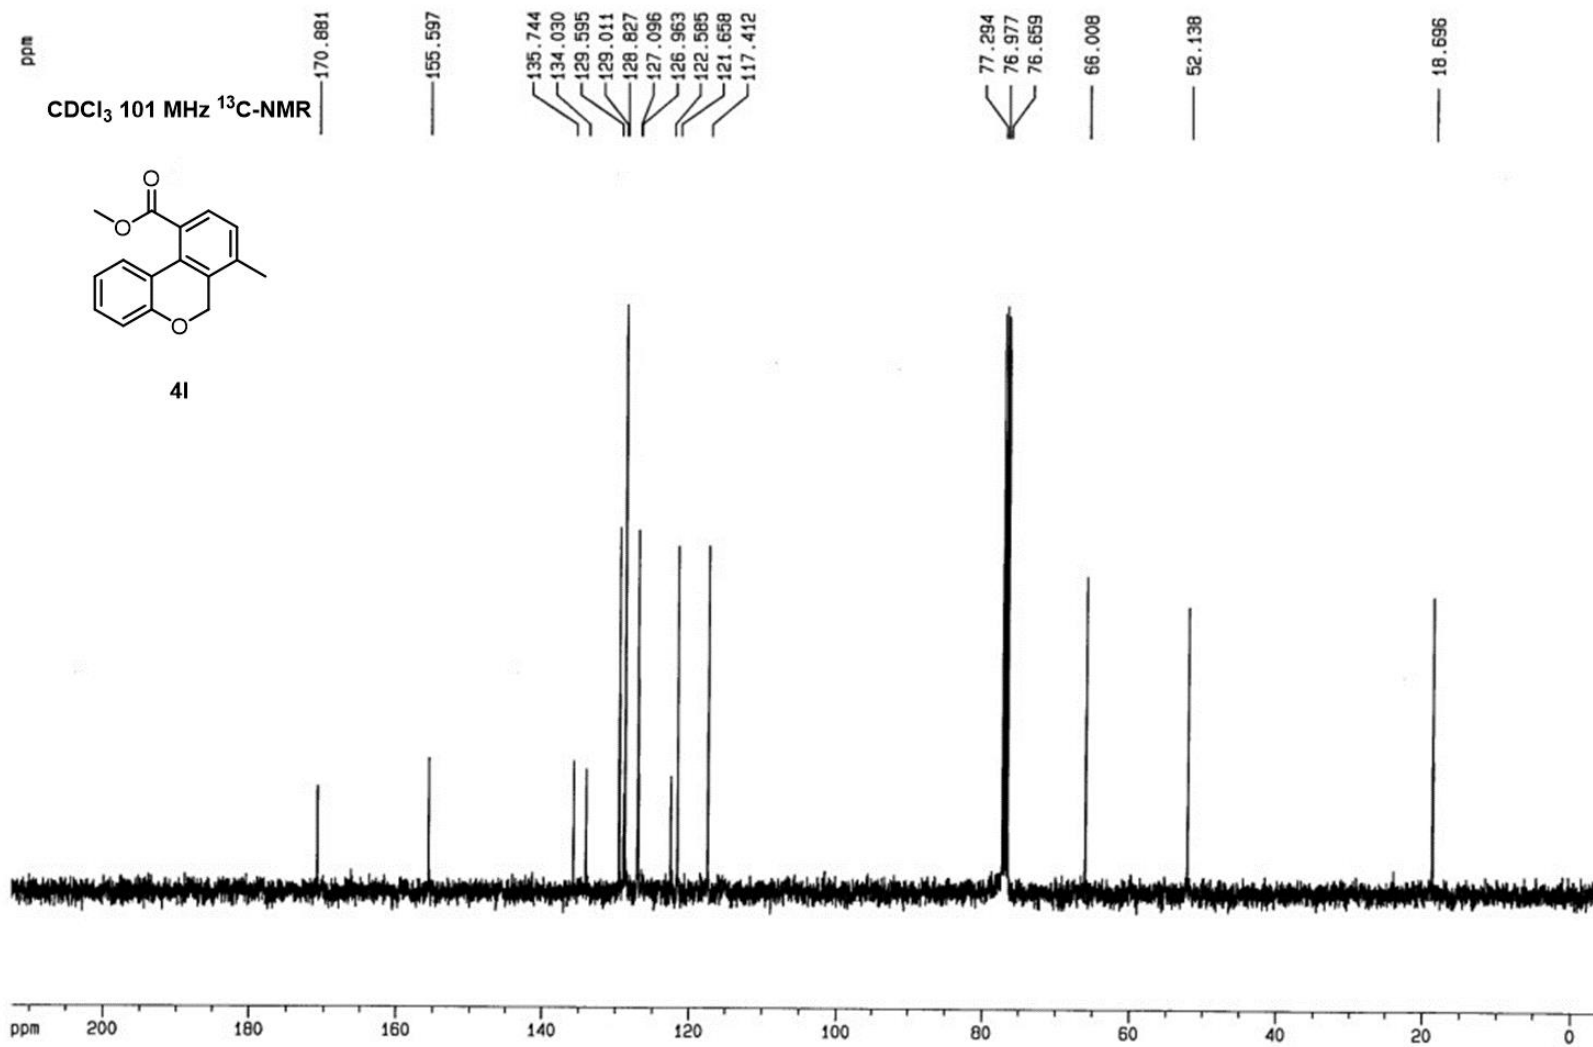

CDCl<sub>3</sub> 400 MHz <sup>1</sup>H-NMR

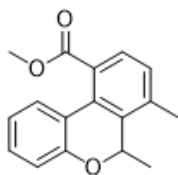

4m

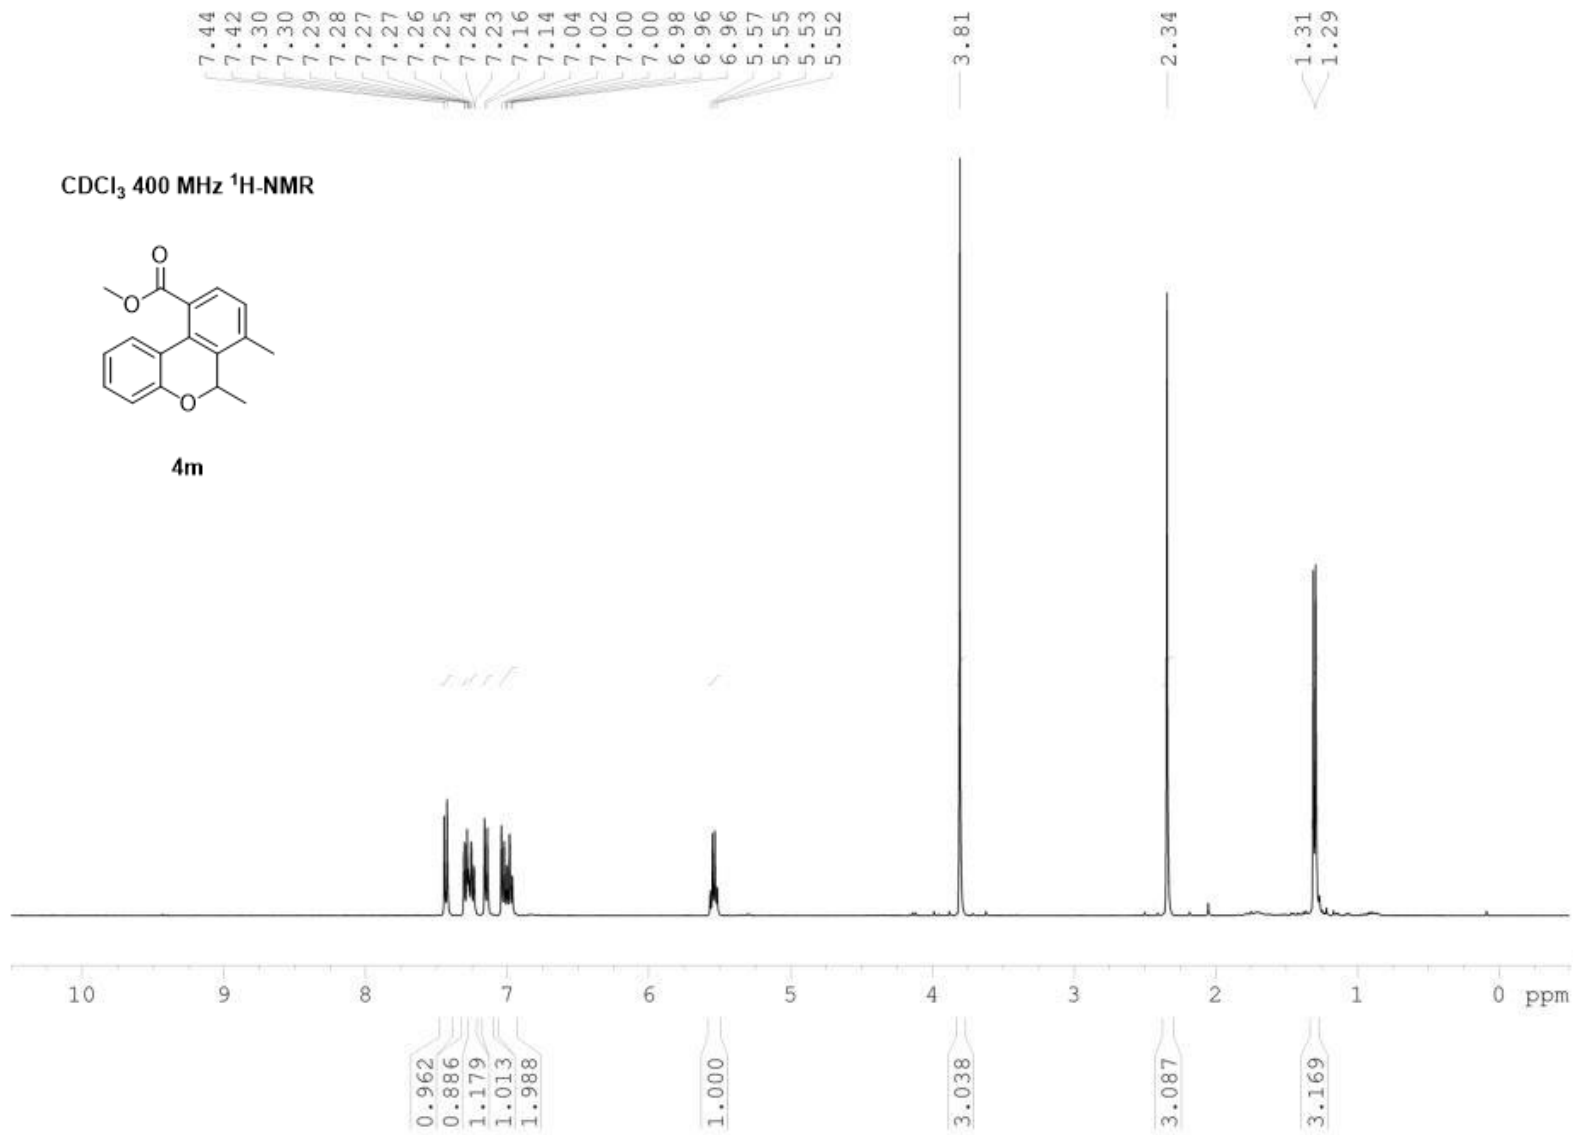

CDCl<sub>3</sub> 101 MHz <sup>13</sup>C-NMR

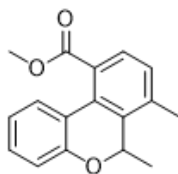

4m

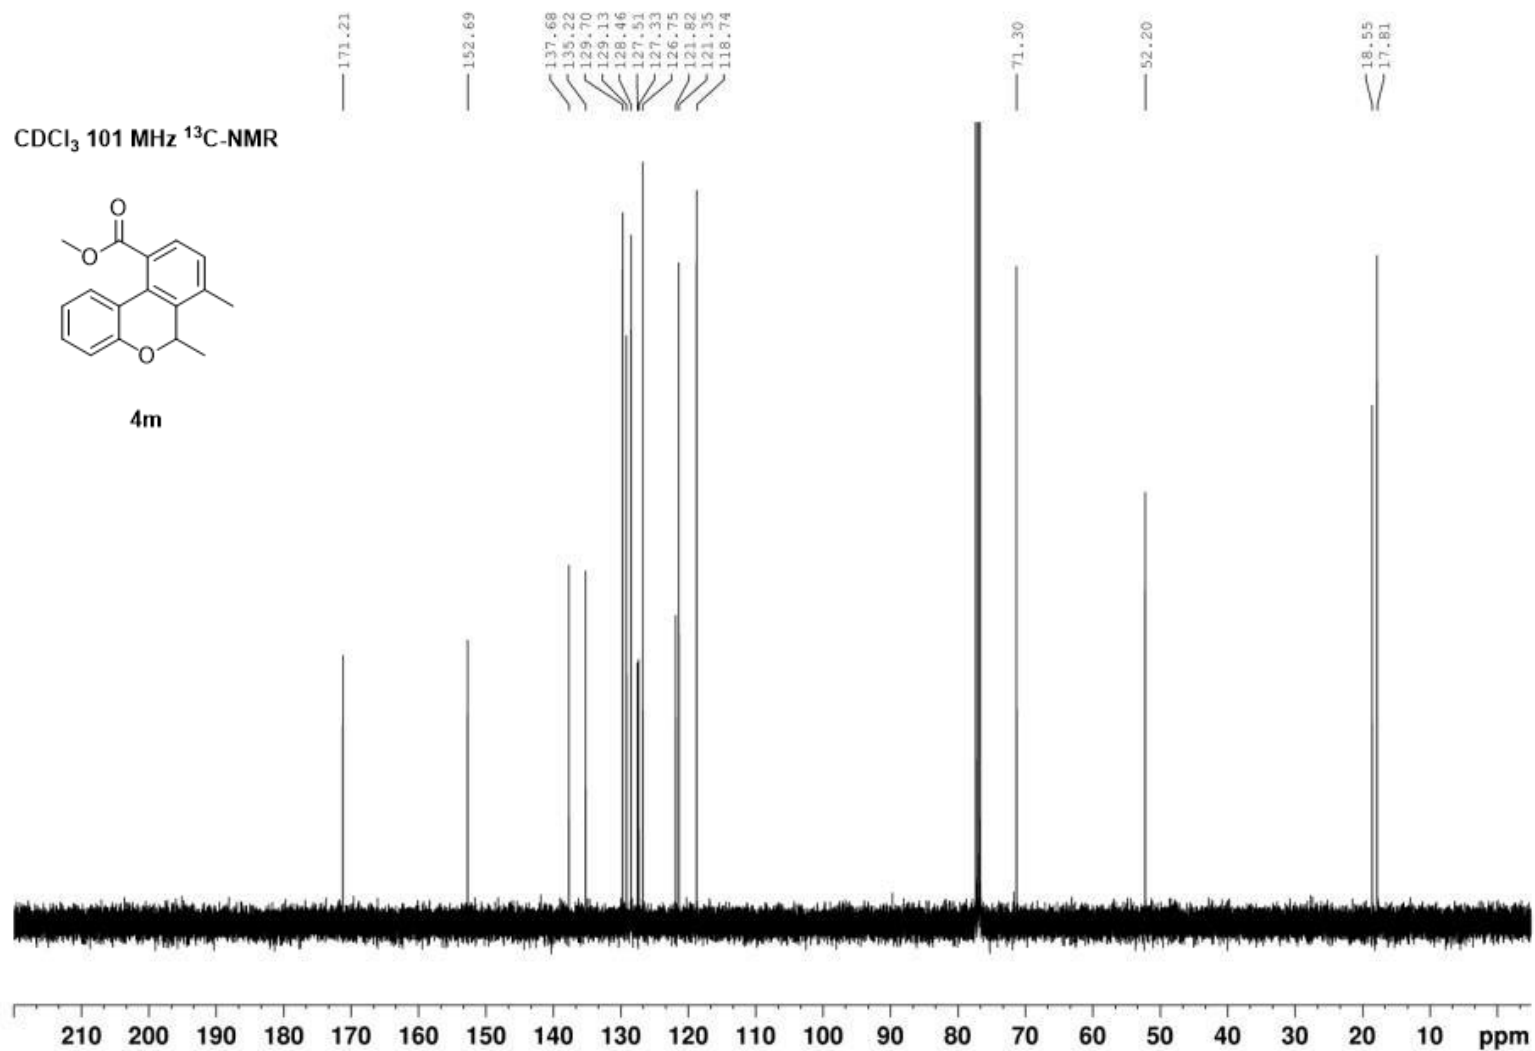

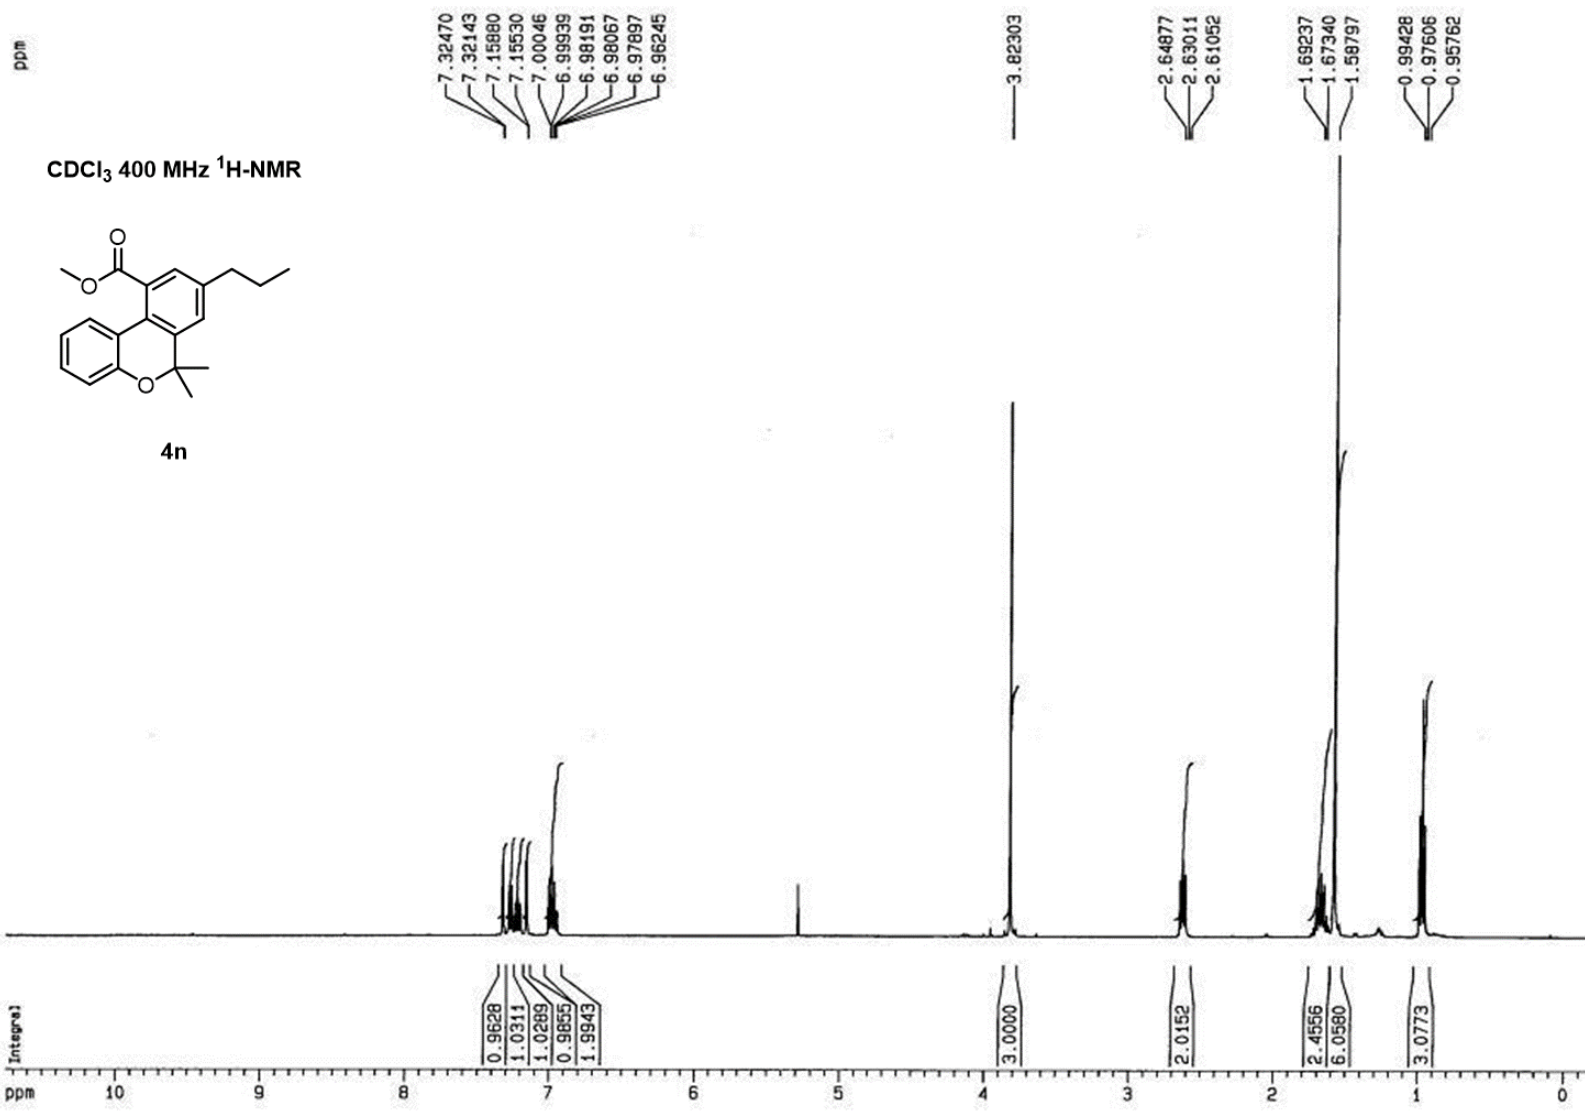

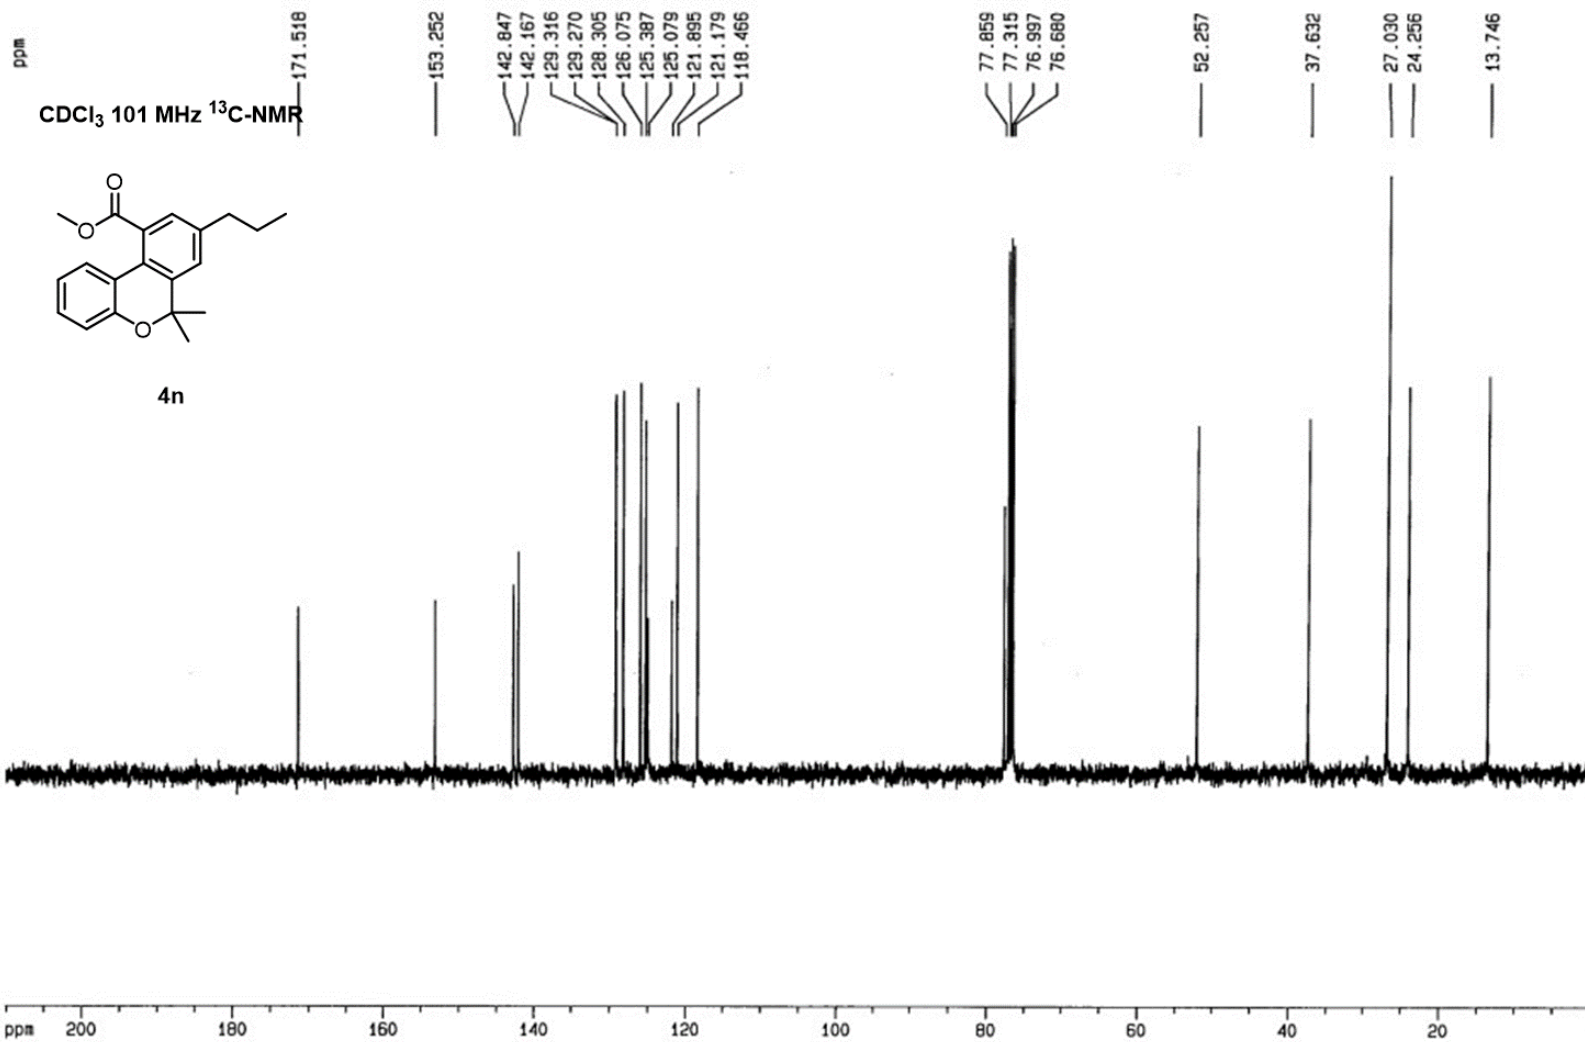

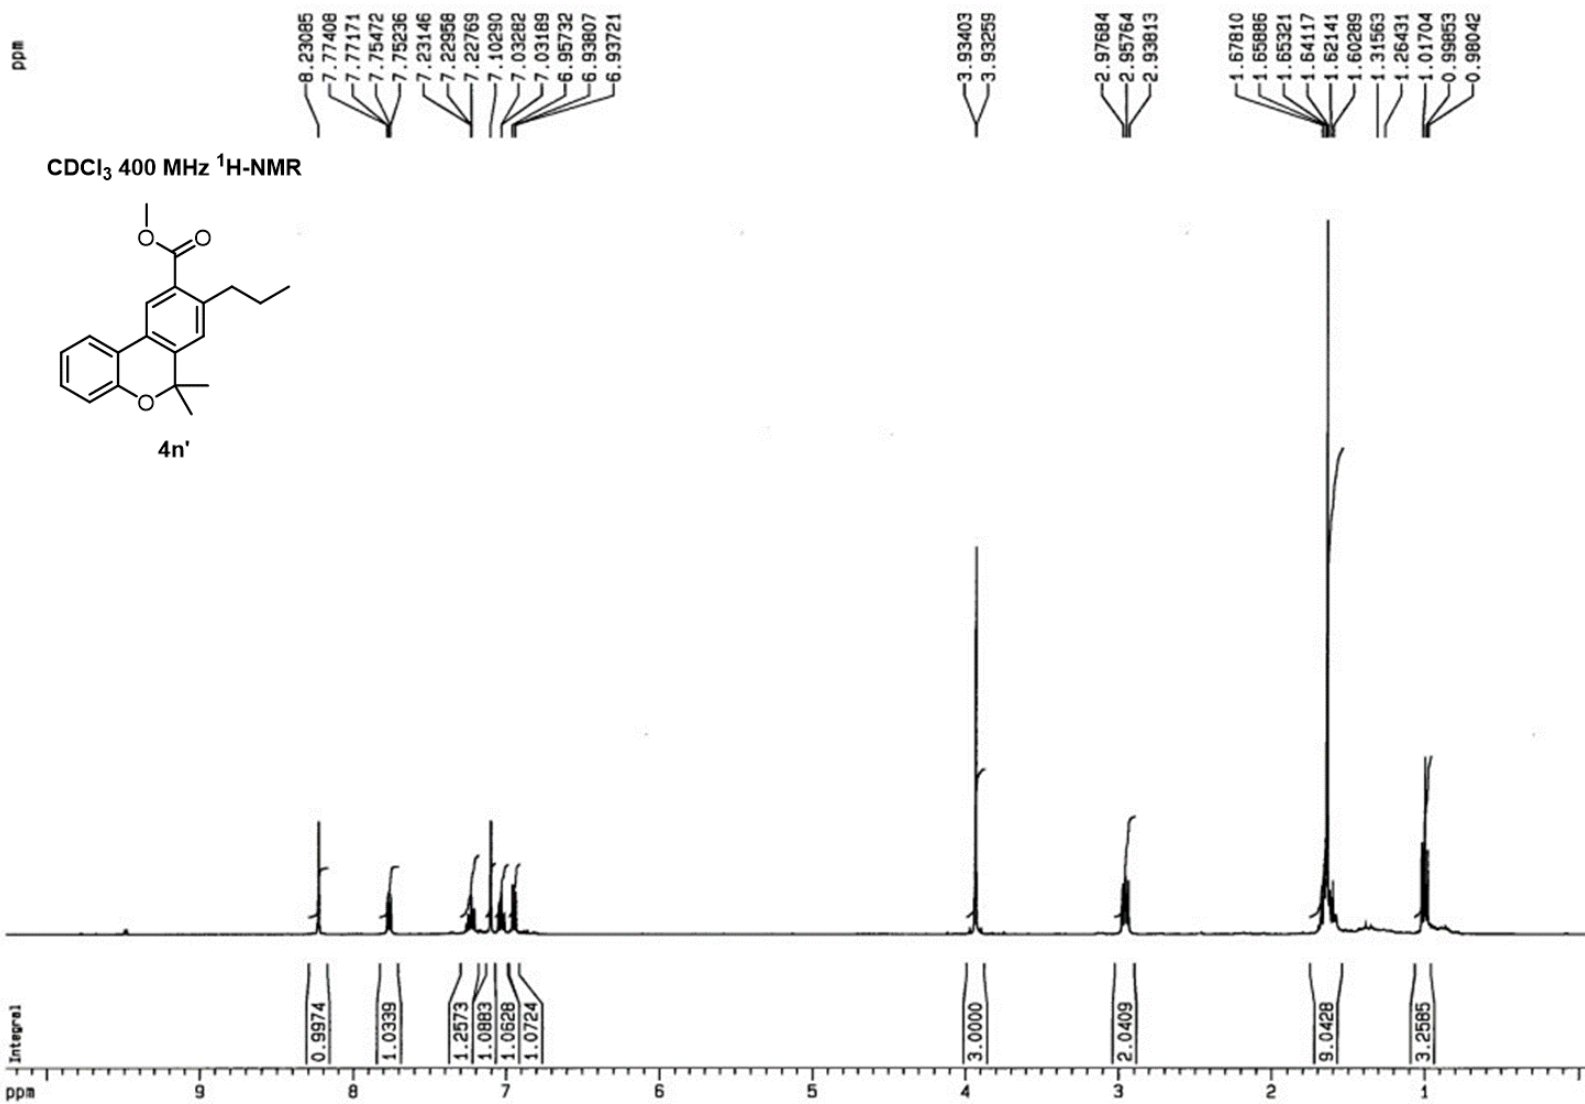



ppm

CDCl<sub>3</sub> 101 MHz <sup>13</sup>C-NMR

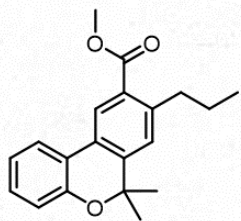

4n'

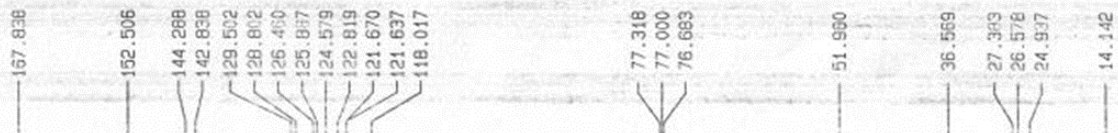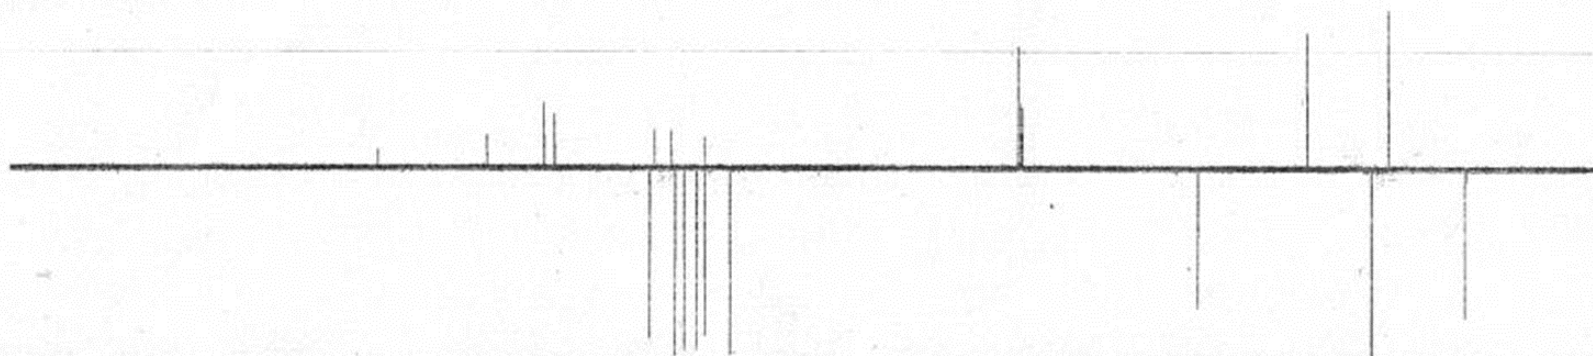

ppm 200 180 160 140 120 100 80 60 40 20 0

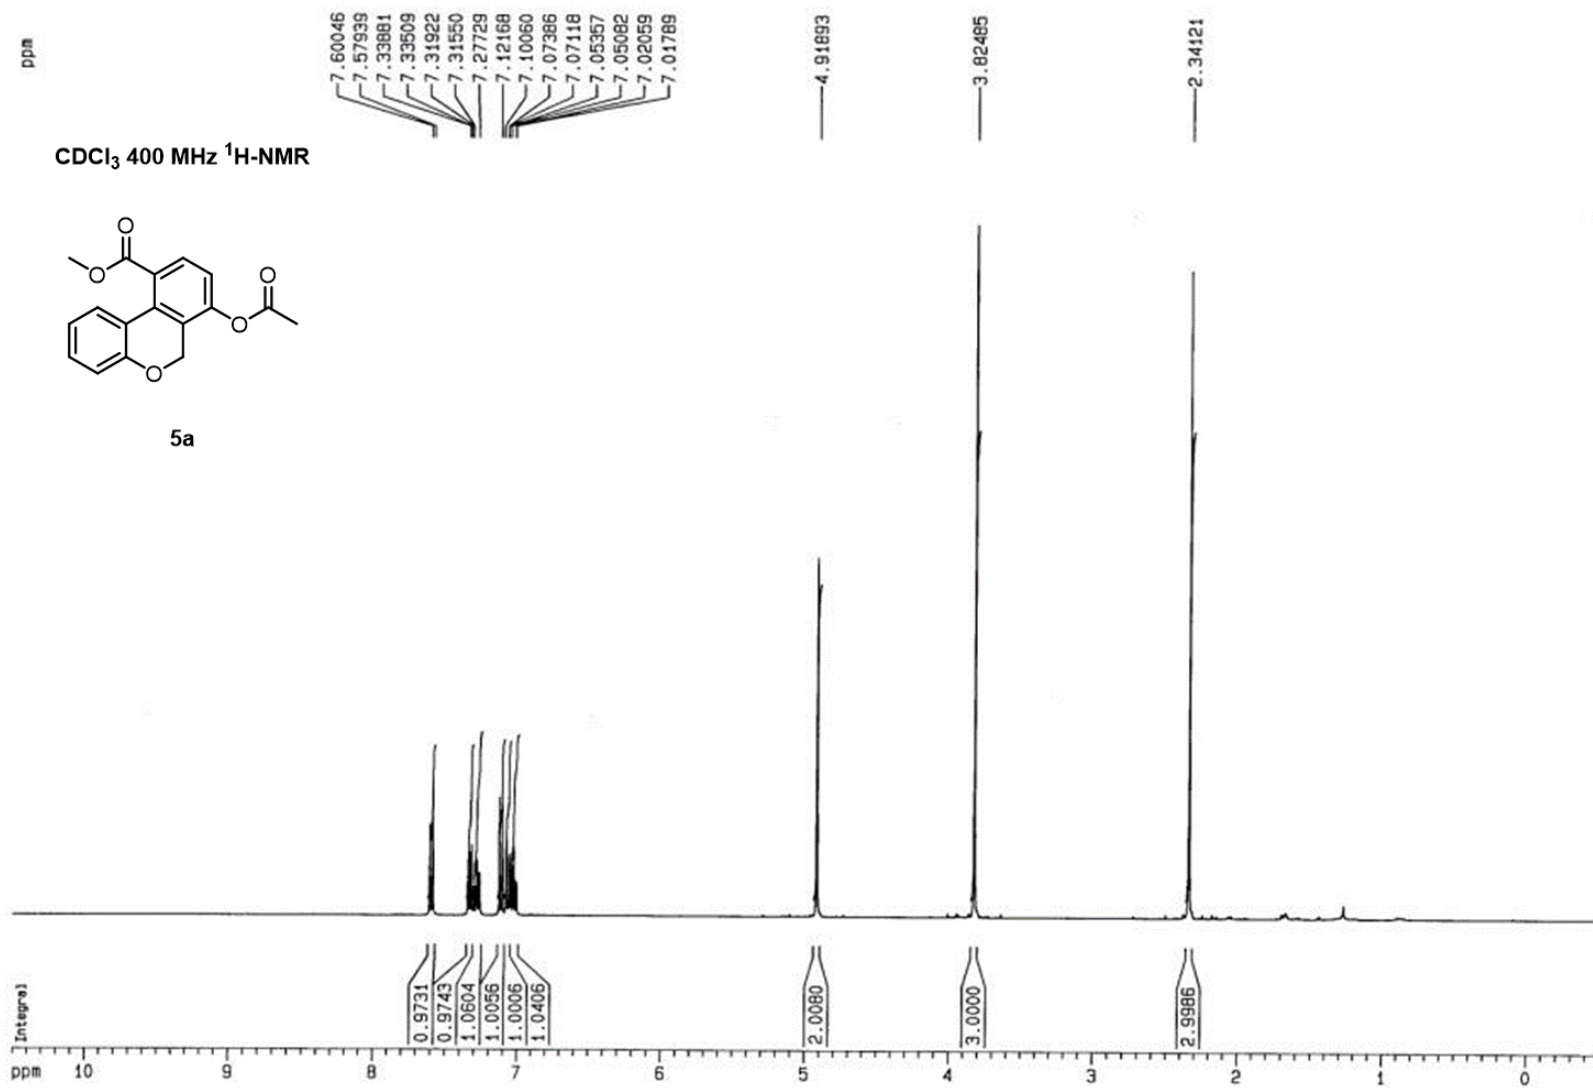

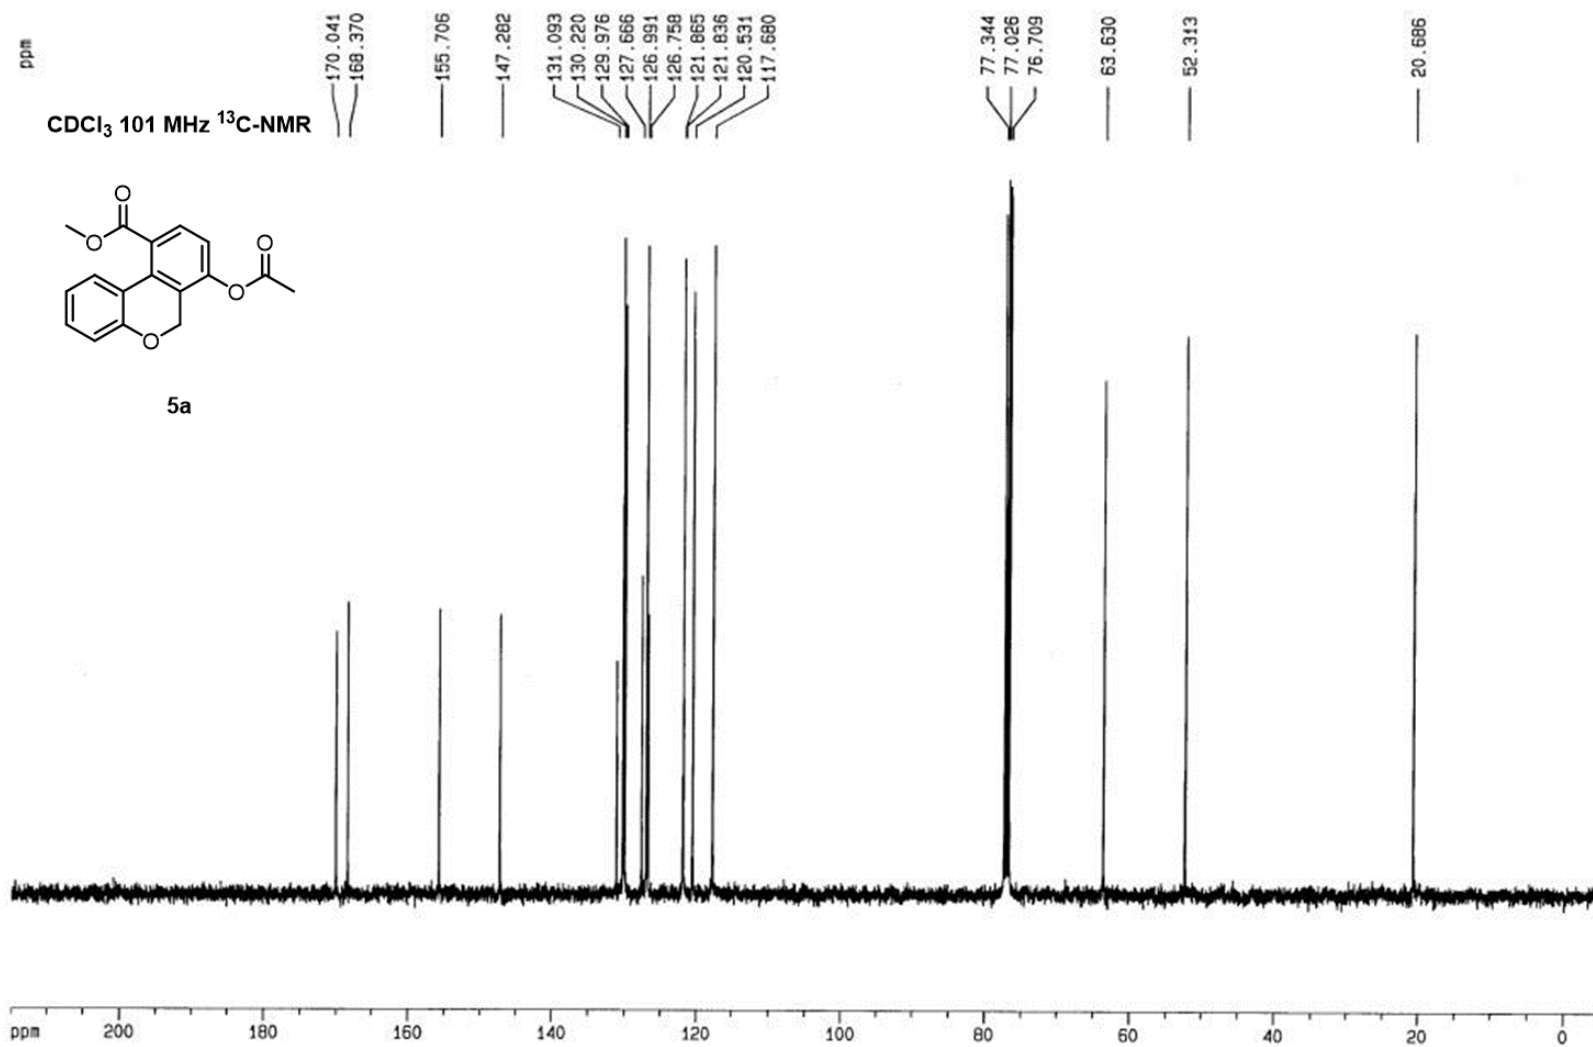

CDCl<sub>3</sub> 400 MHz <sup>1</sup>H-NMR

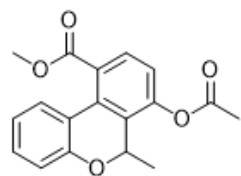

5b

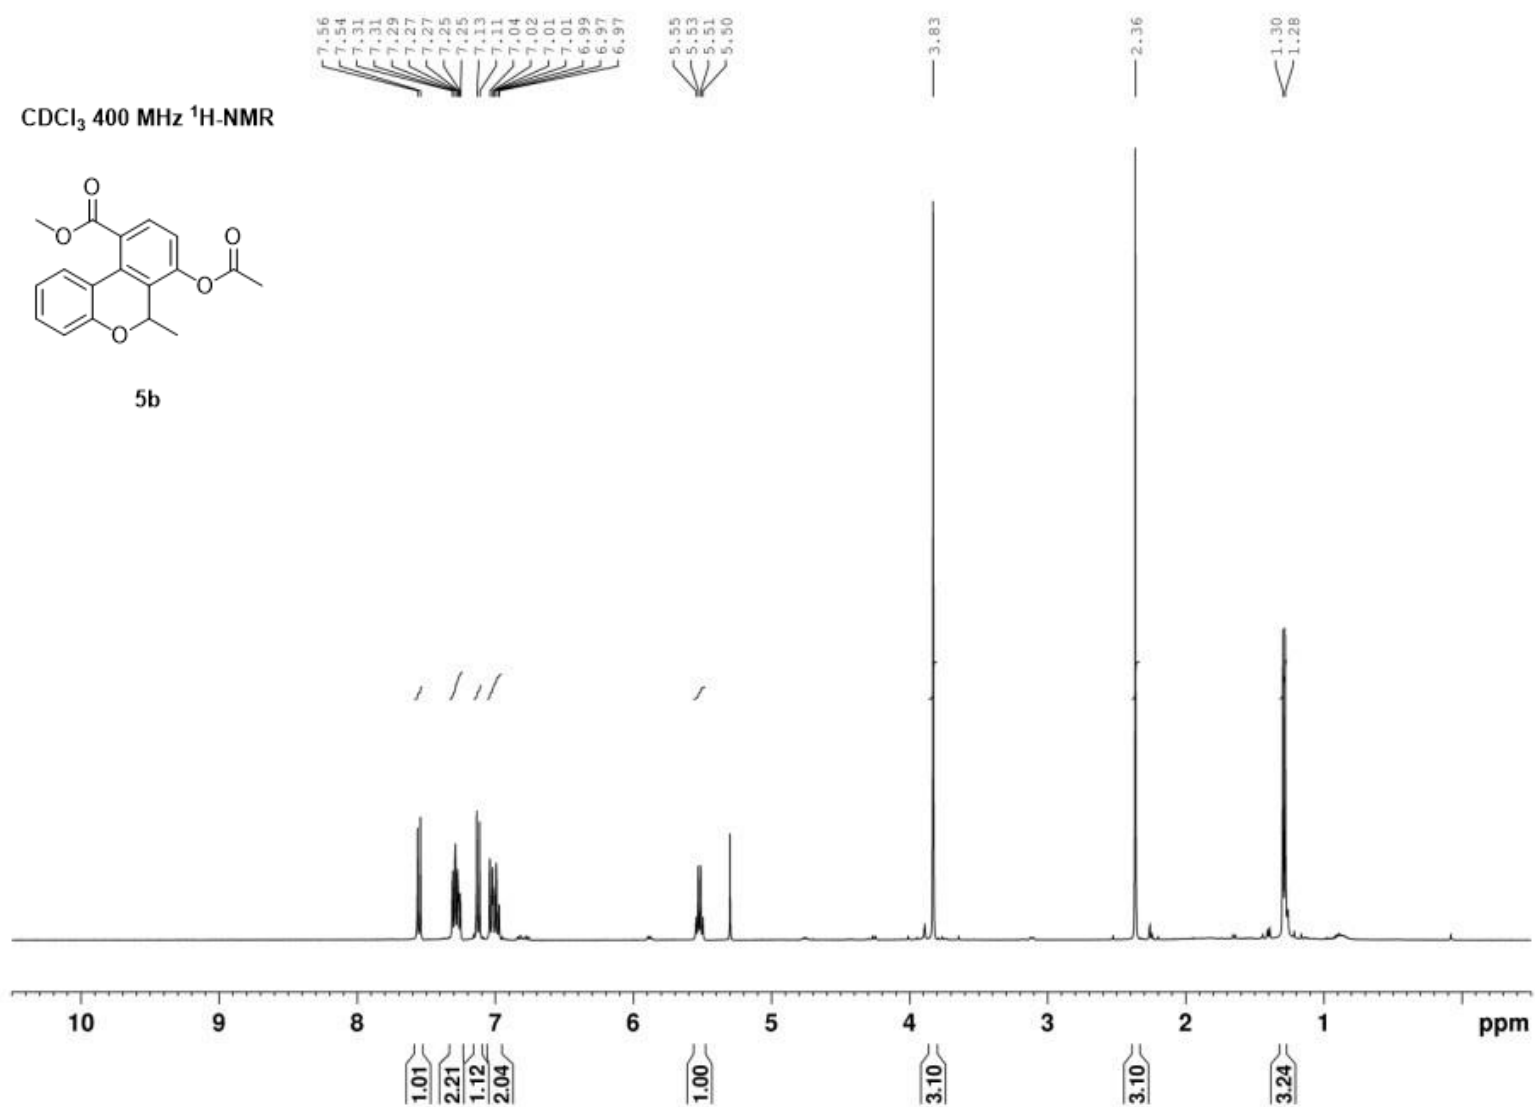

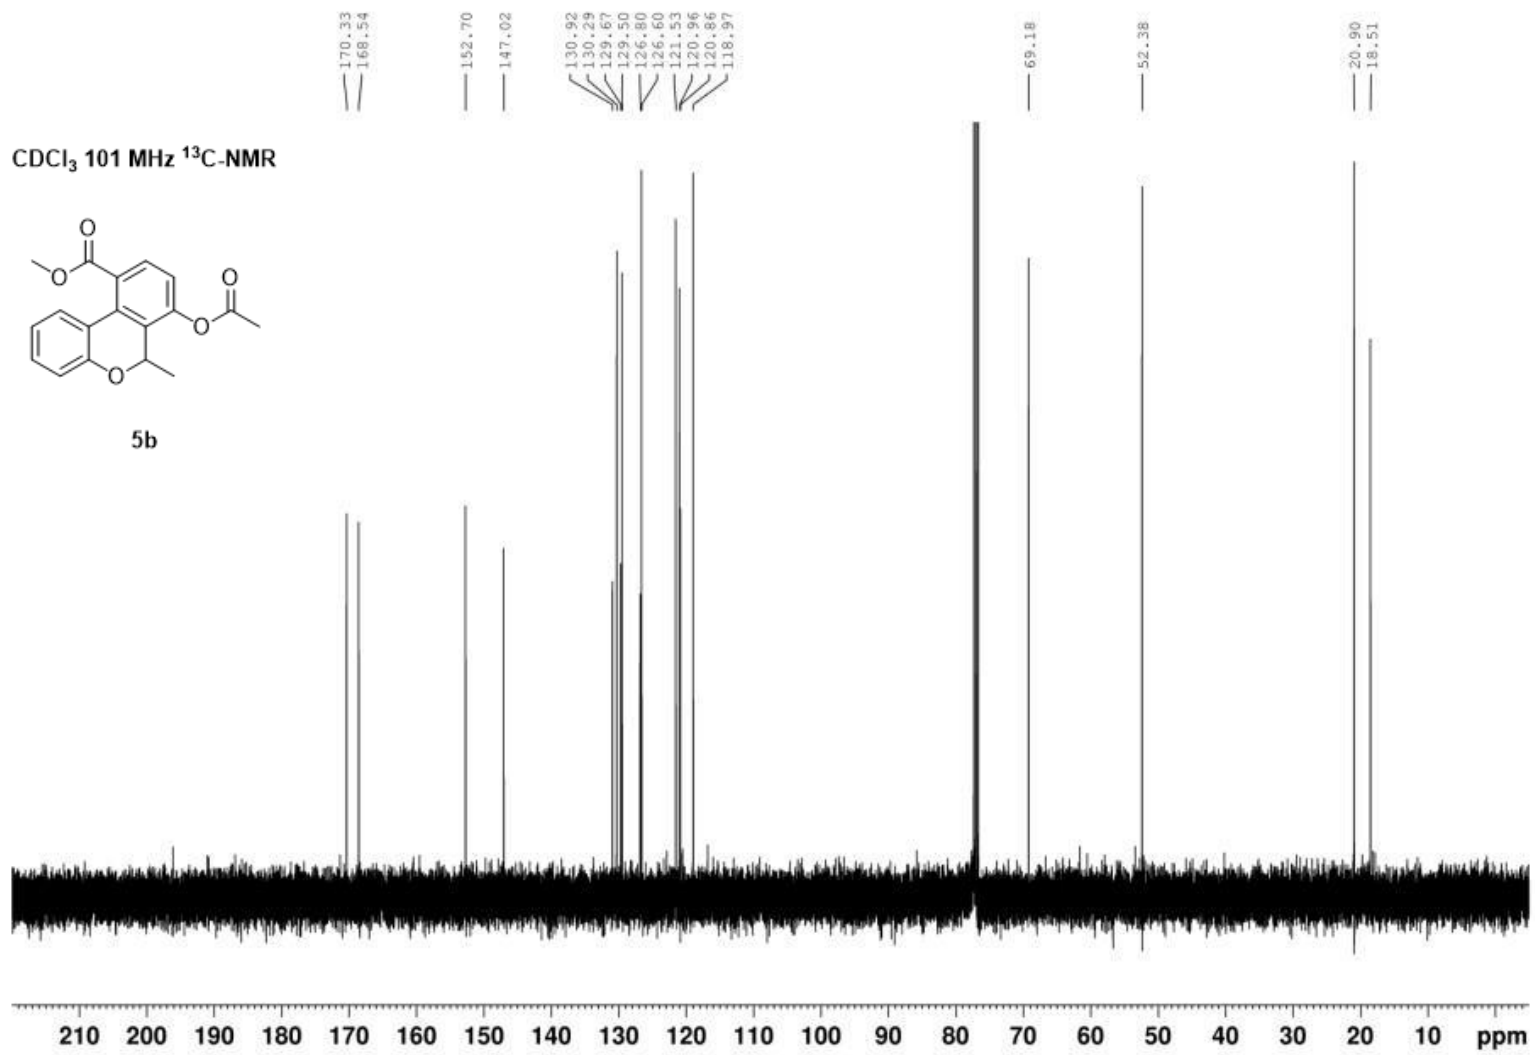

CDCl<sub>3</sub> 400 MHz <sup>1</sup>H-NMR

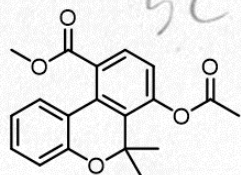

5c

7.580  
7.559  
7.266  
7.251  
7.232  
7.215  
7.195  
7.028  
7.007  
6.990  
6.970  
6.952

3.787

2.365

1.617

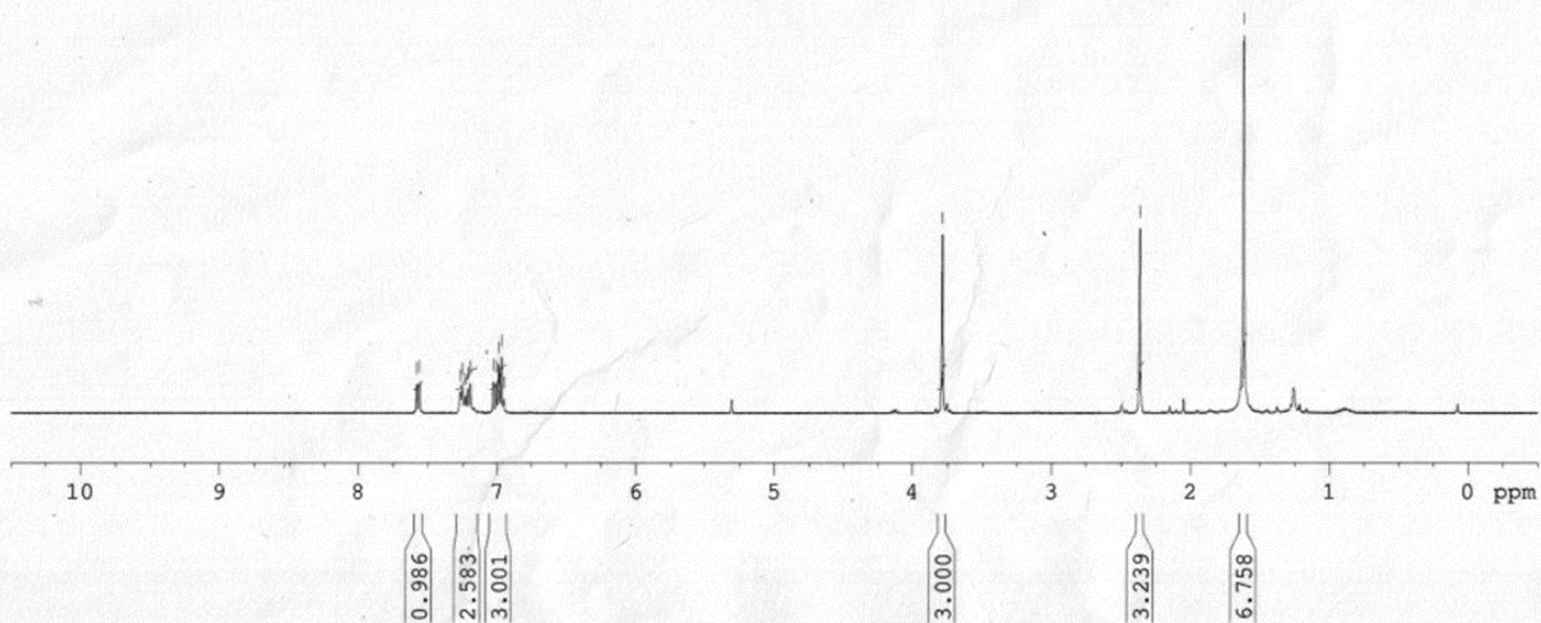

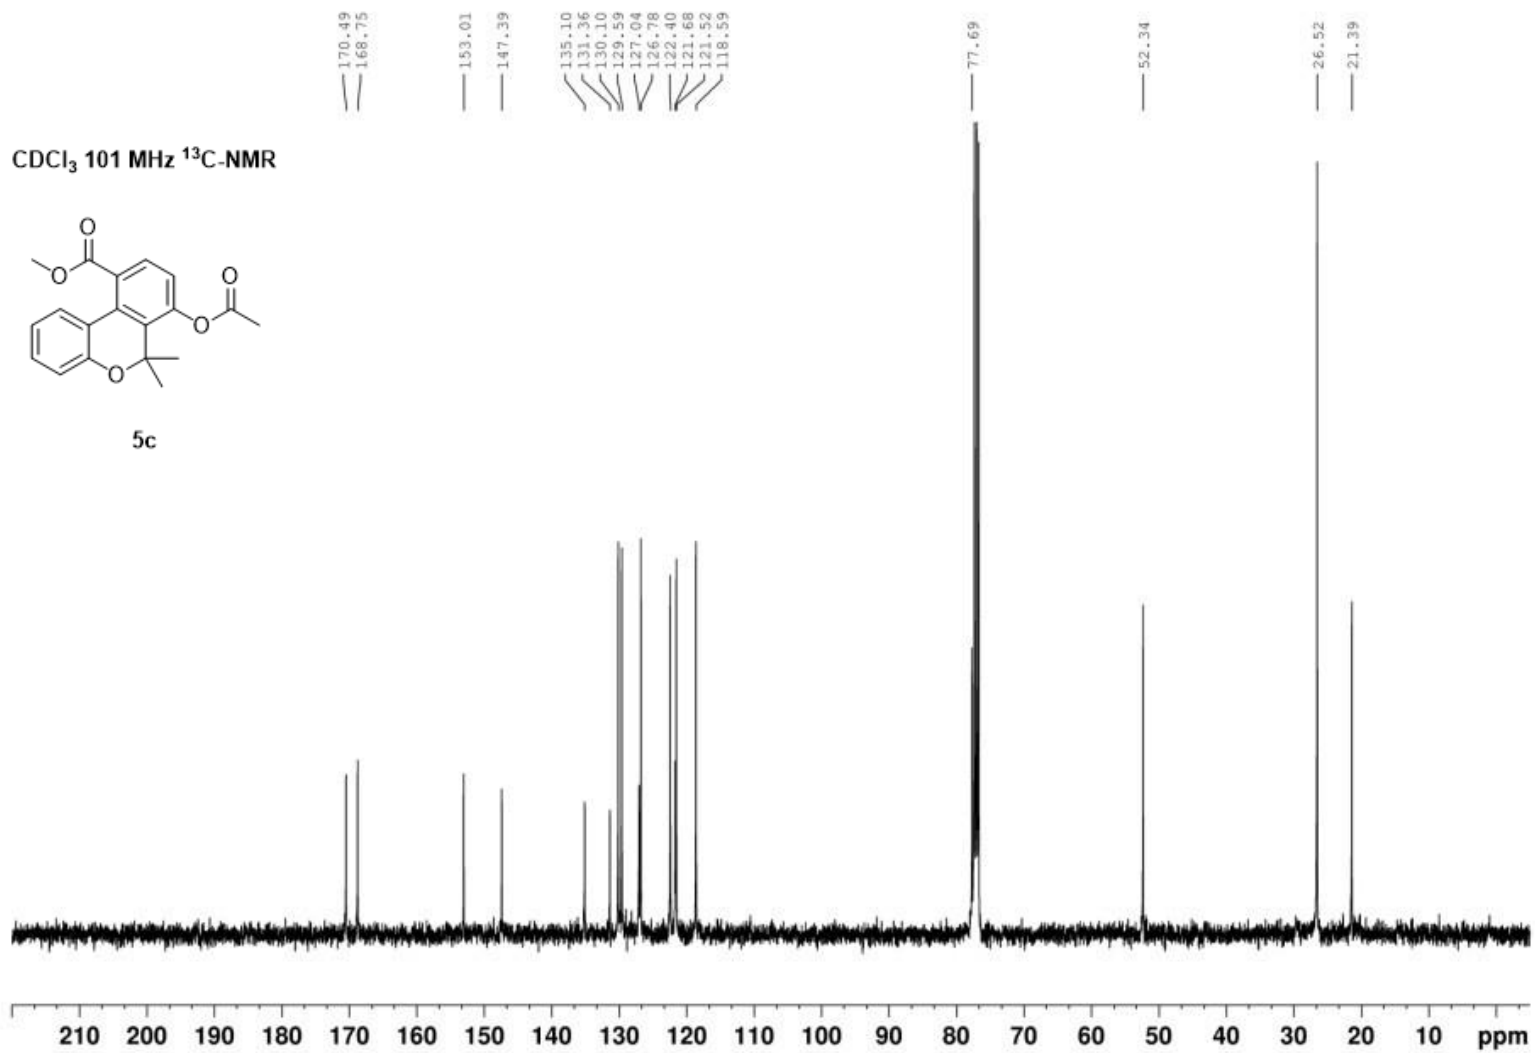

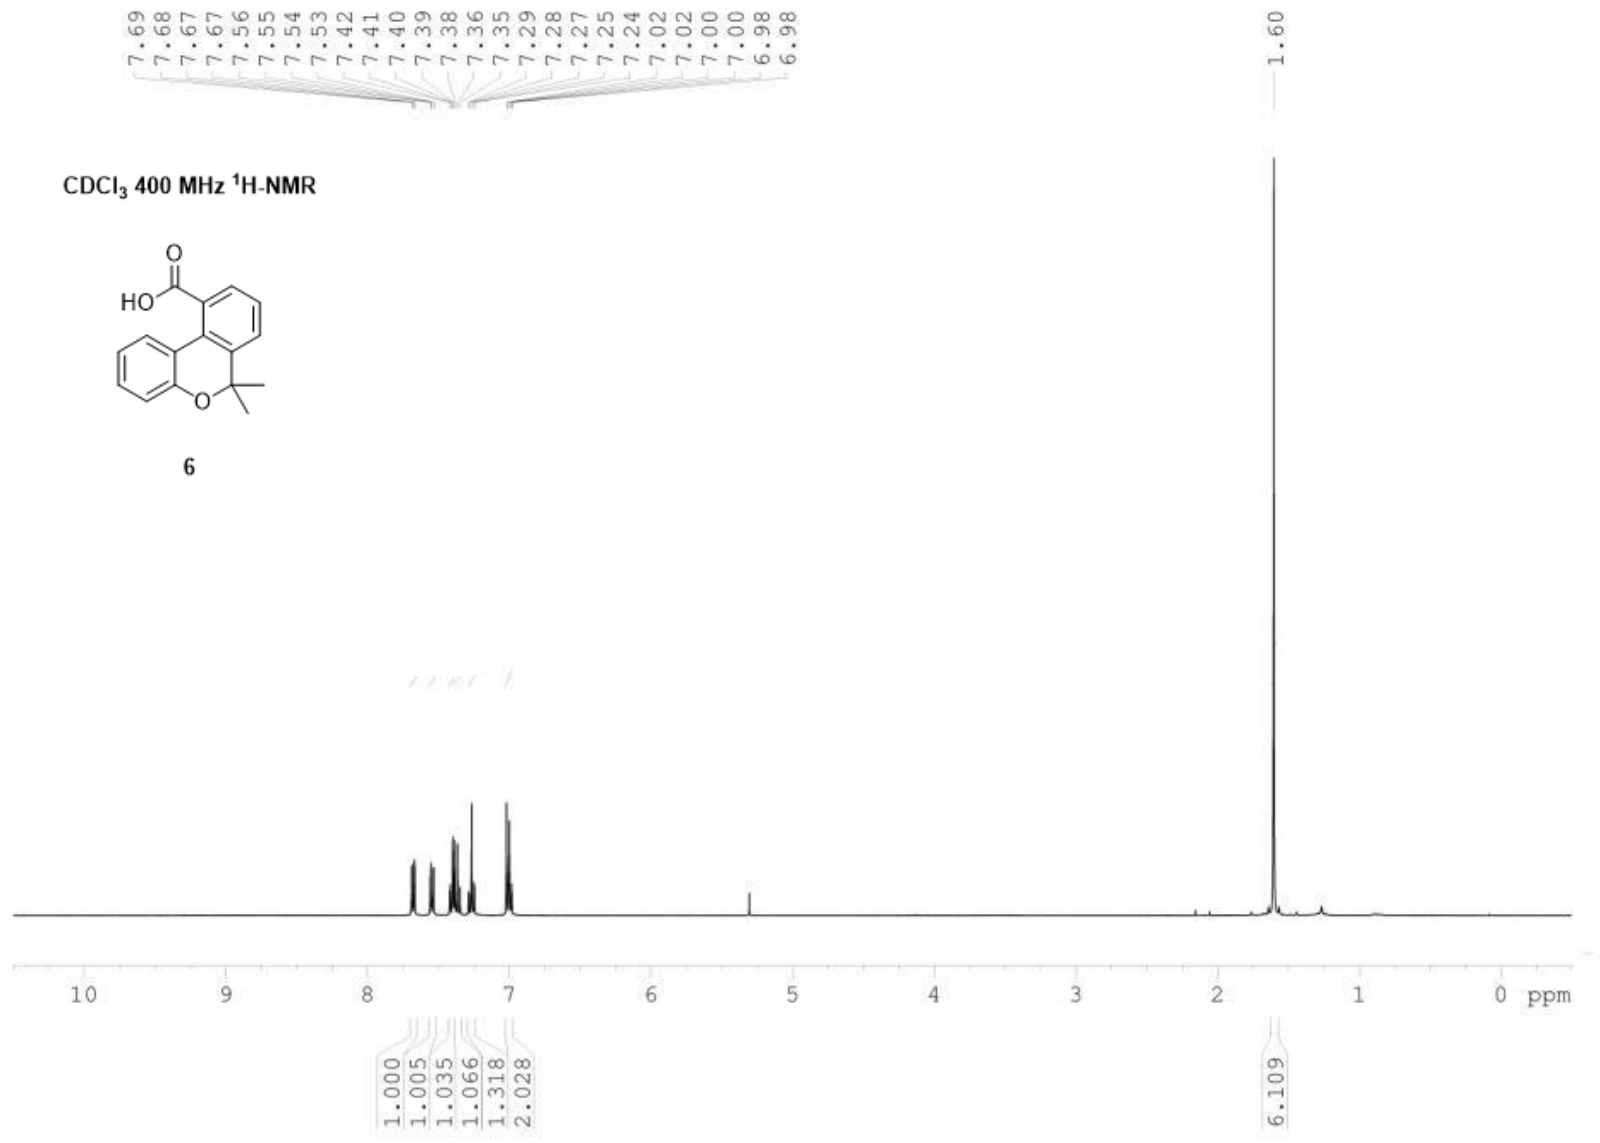



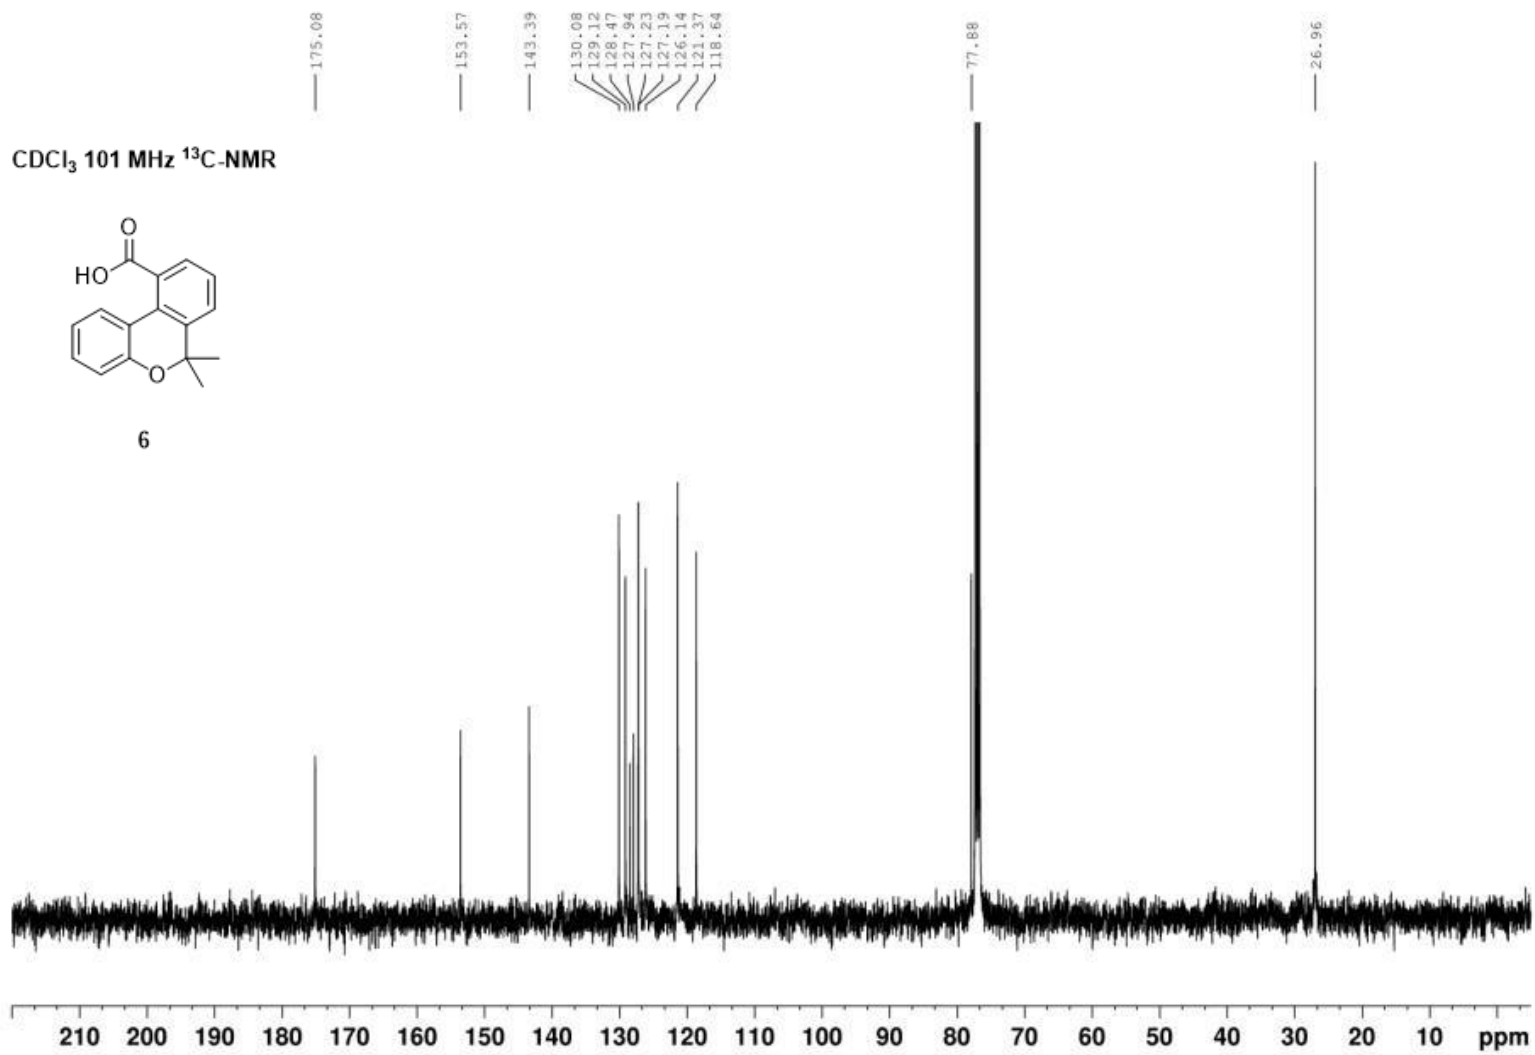

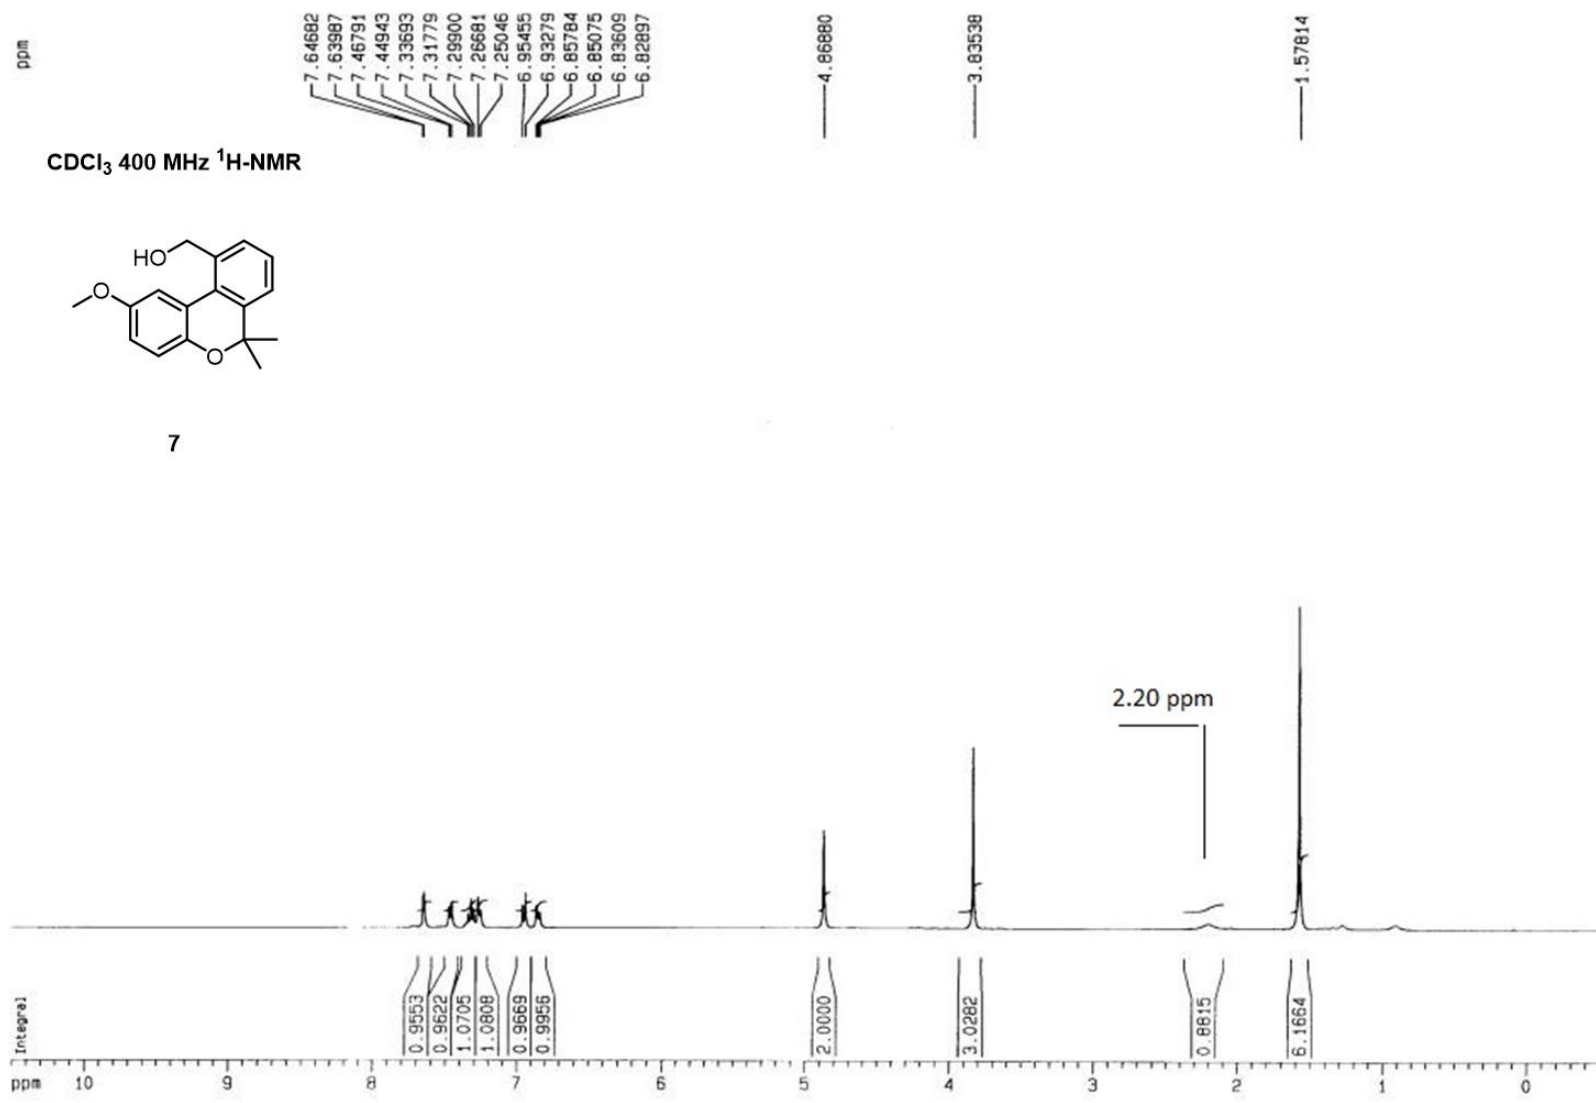

ppm

154.211  
147.707  
142.953  
135.885  
130.149  
129.133  
127.755  
123.552  
122.933  
118.599  
114.839  
113.029

77.749  
77.316  
76.998  
76.680  
64.262  
55.715

26.838

CDCl<sub>3</sub> 101 MHz <sup>13</sup>C-NMR

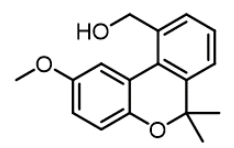

7

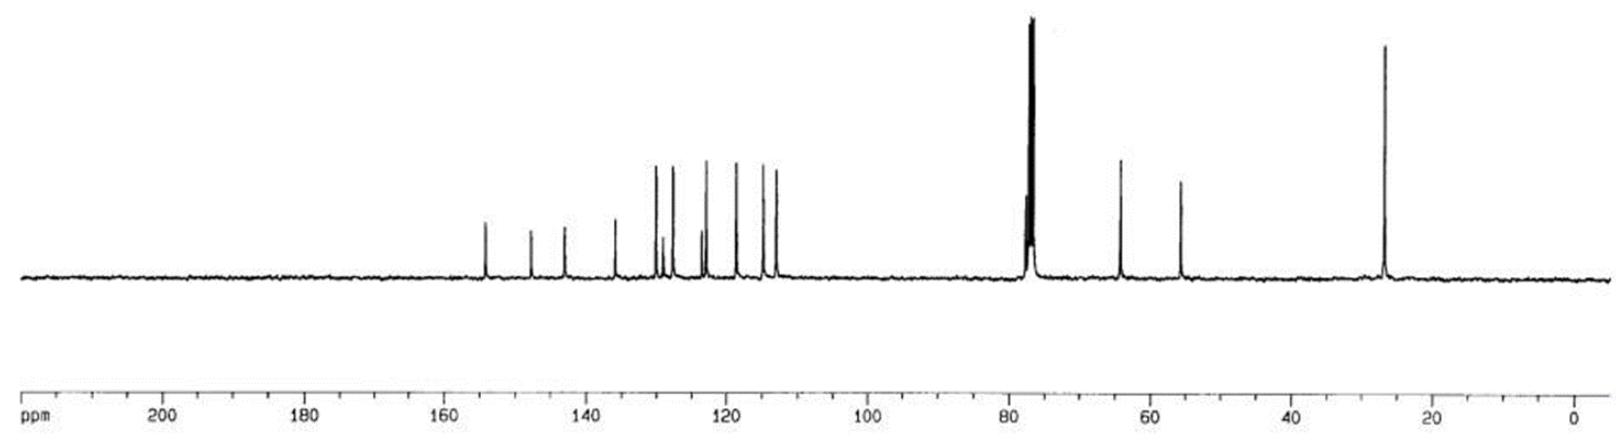

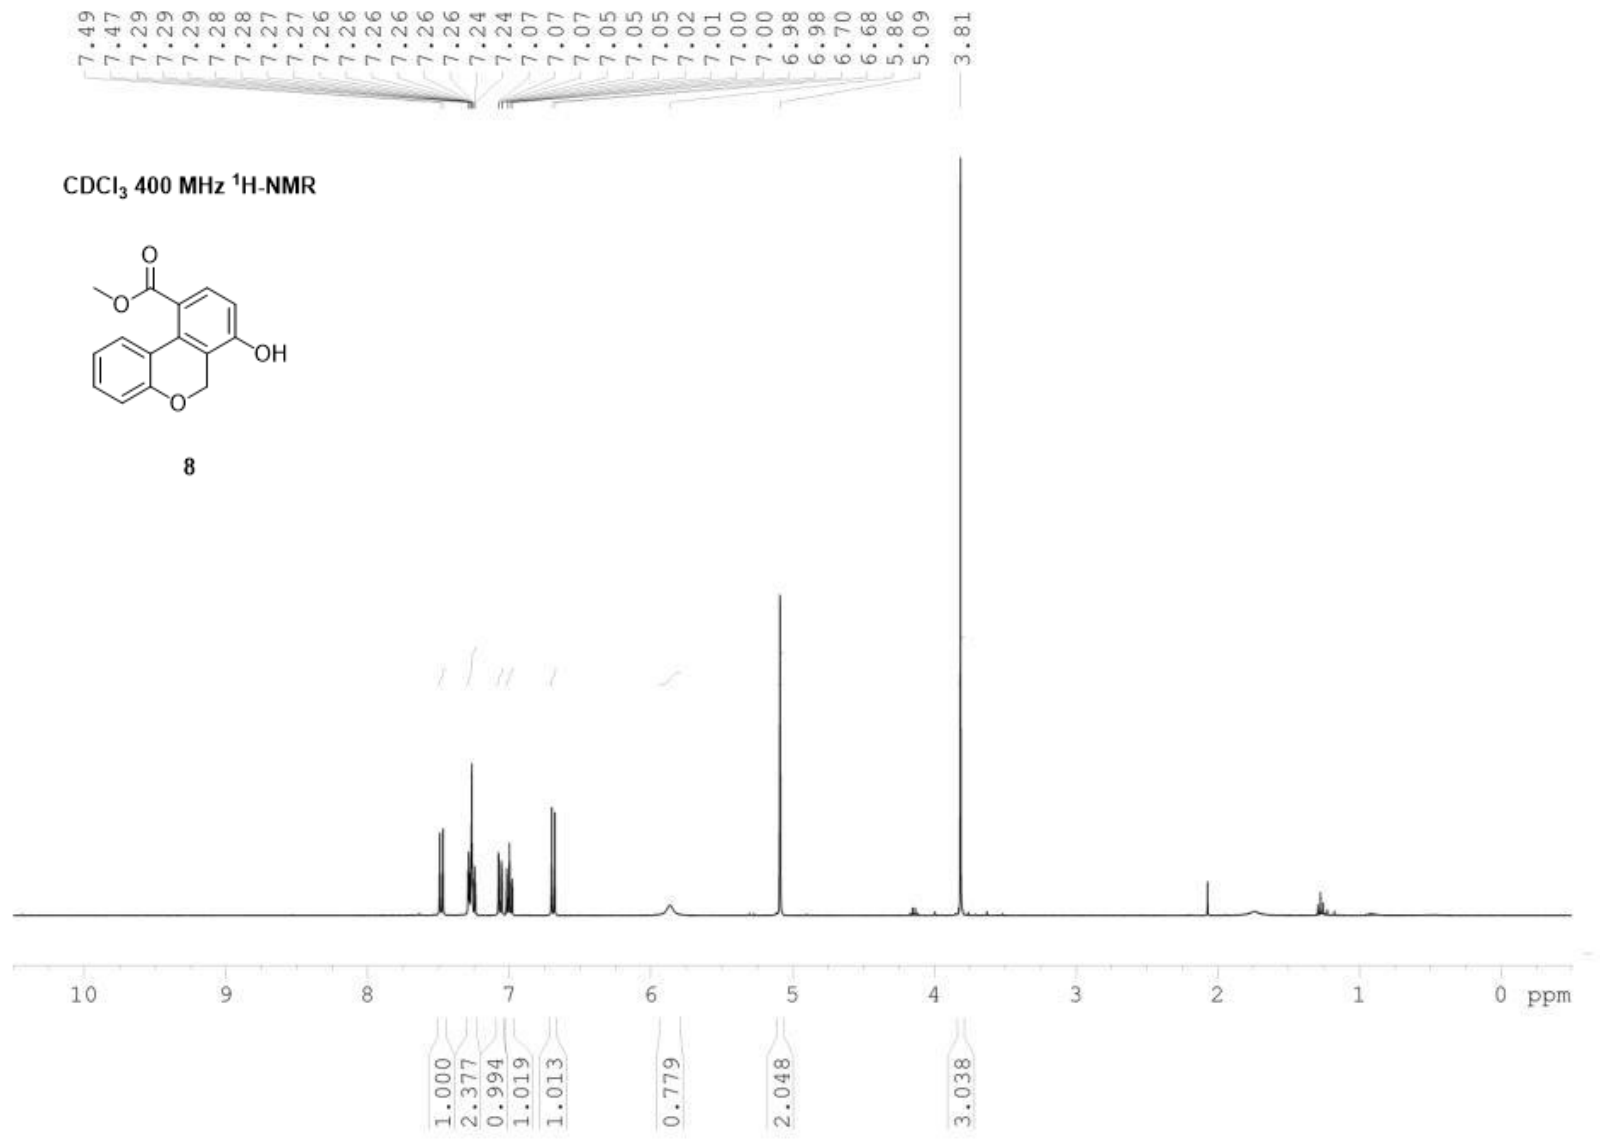

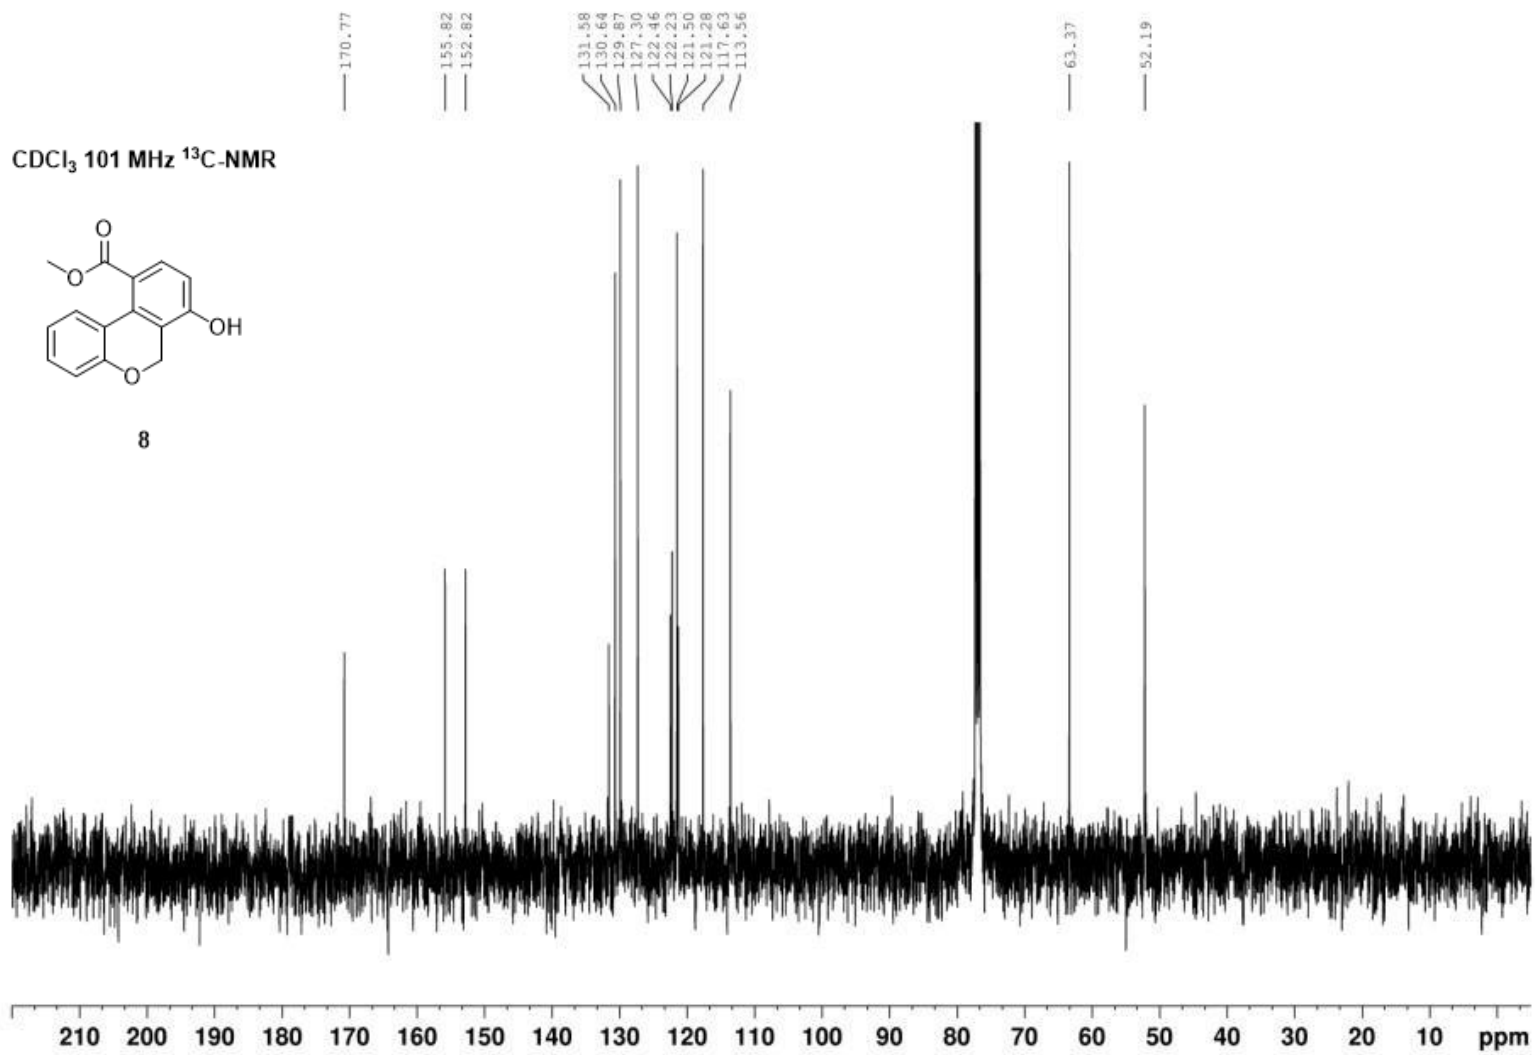

CDCl<sub>3</sub> 400 MHz <sup>1</sup>H-NMR

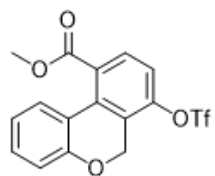

9

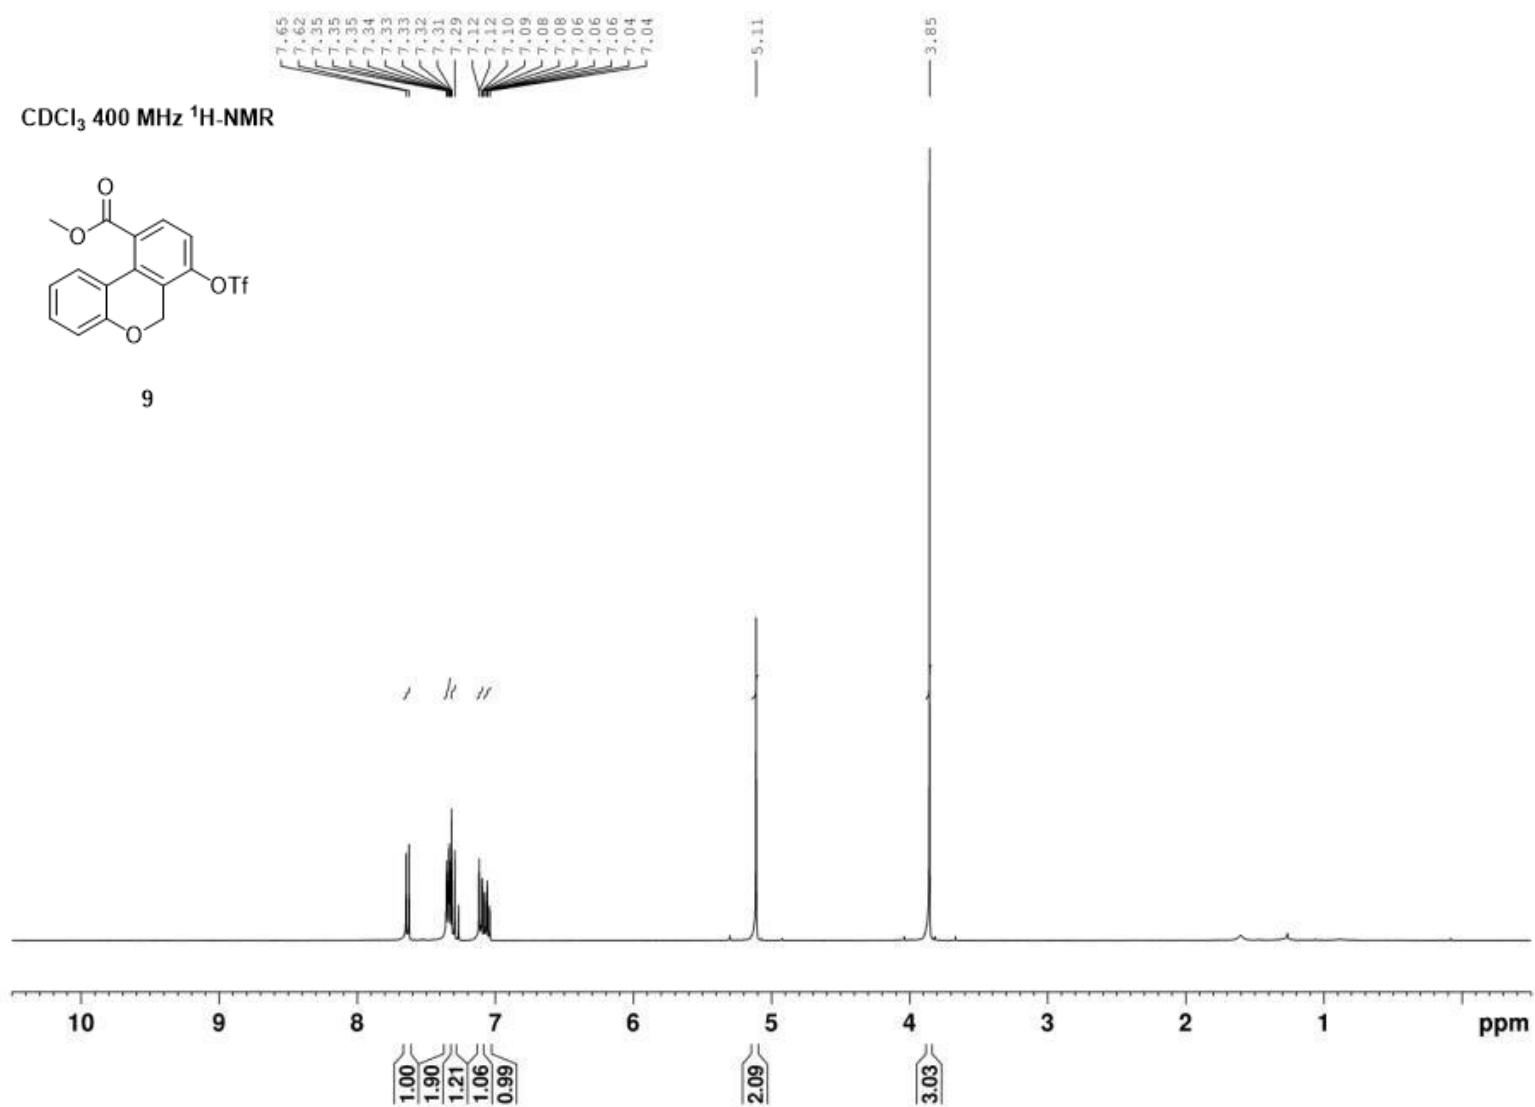

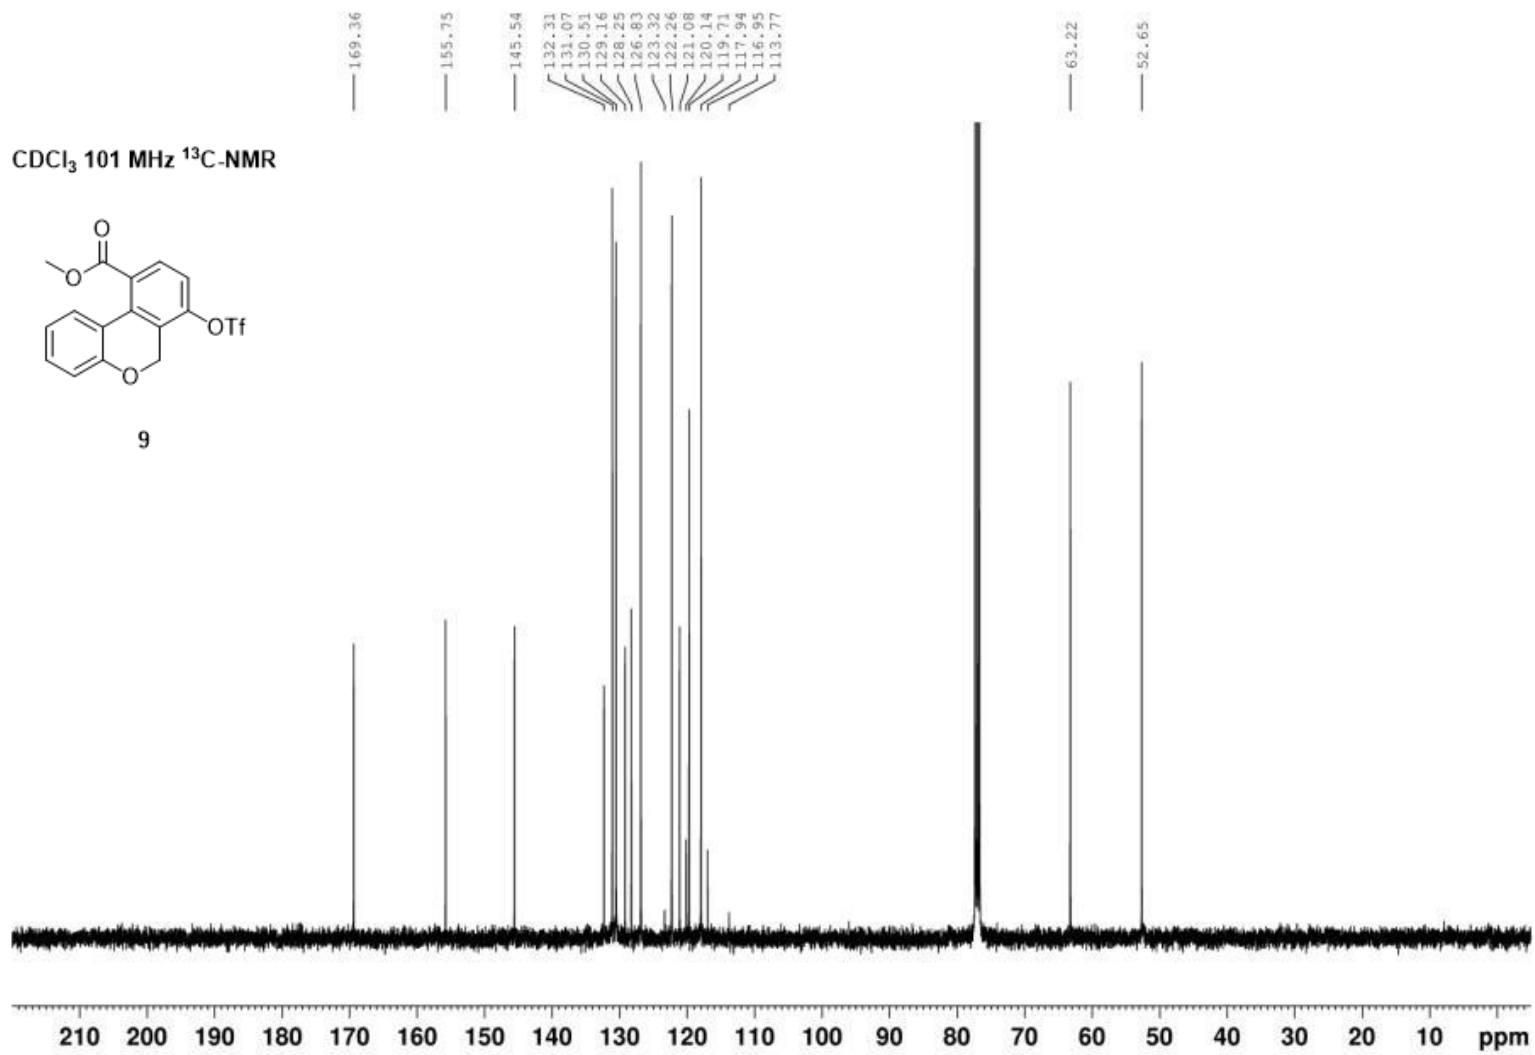

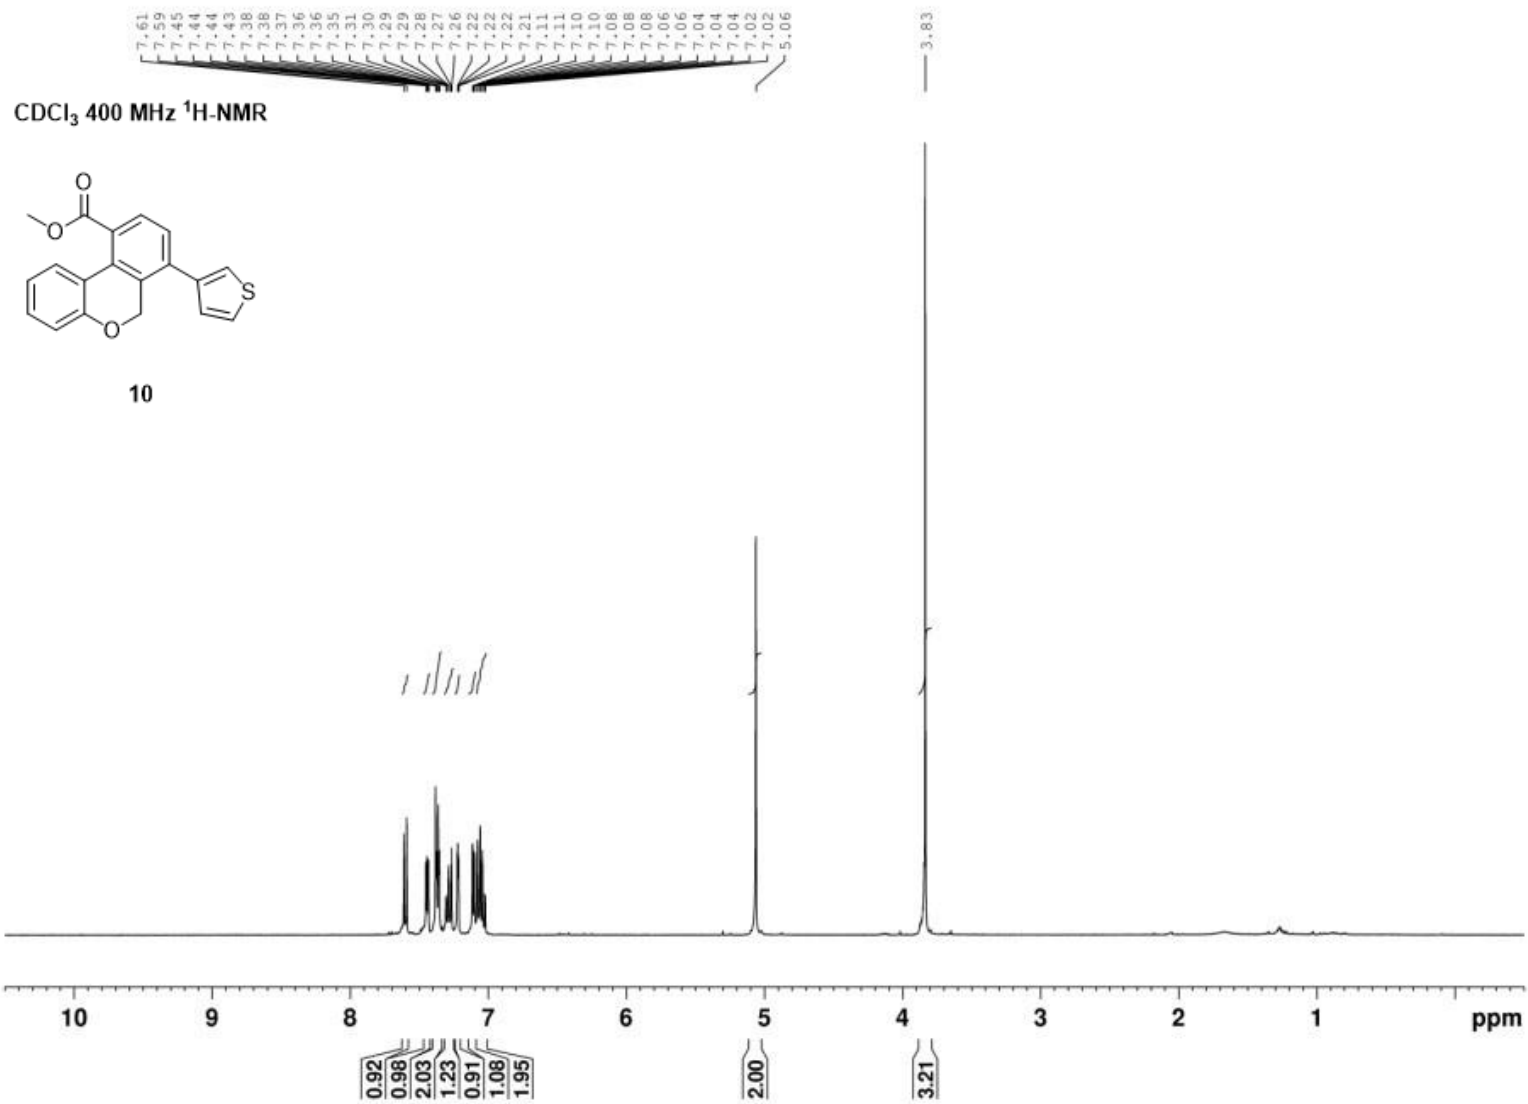



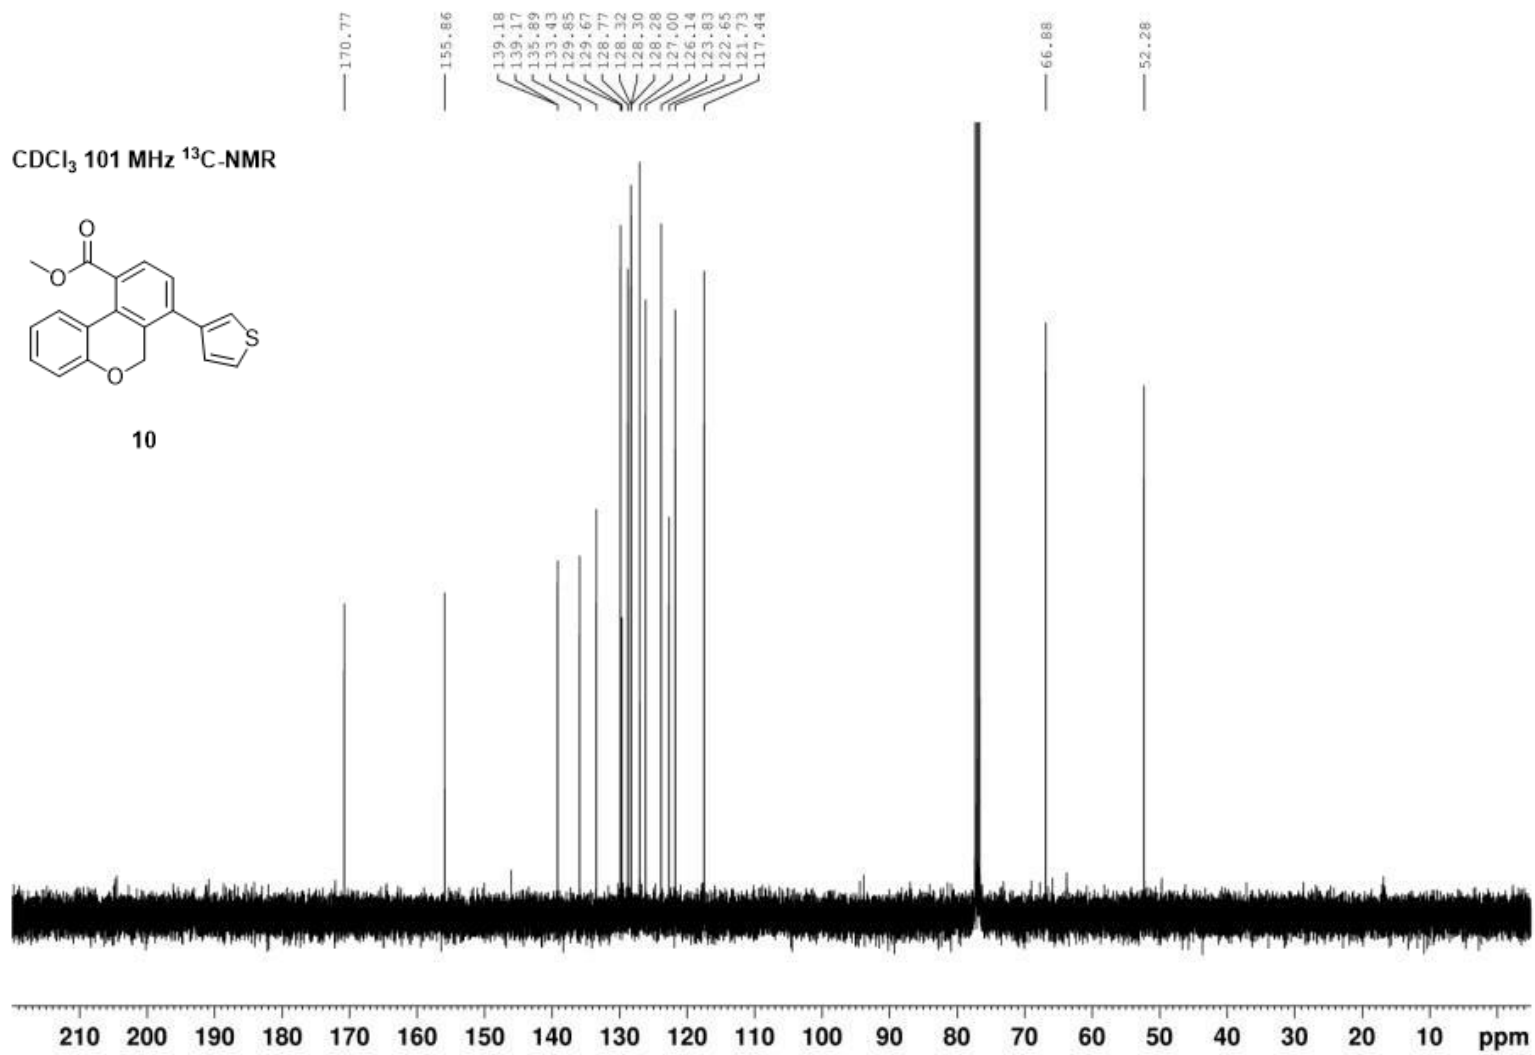

CDCl<sub>3</sub> 400 MHz <sup>1</sup>H-NMR

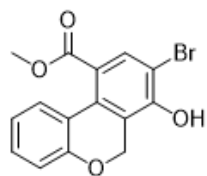

11

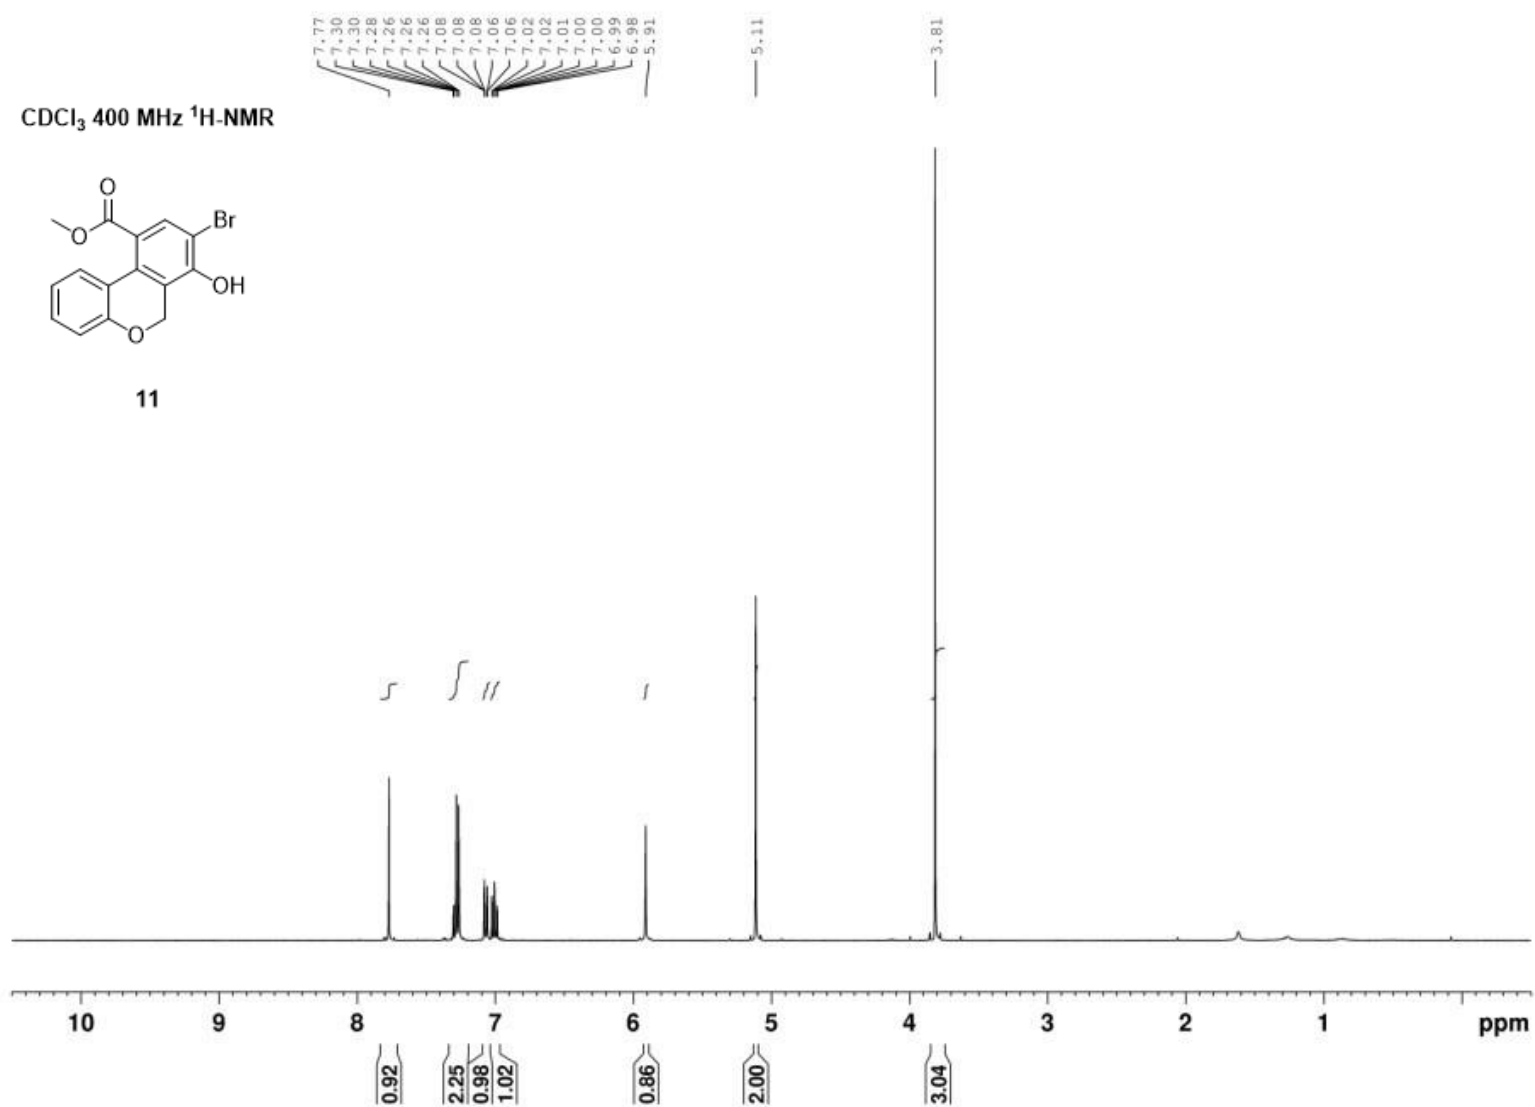

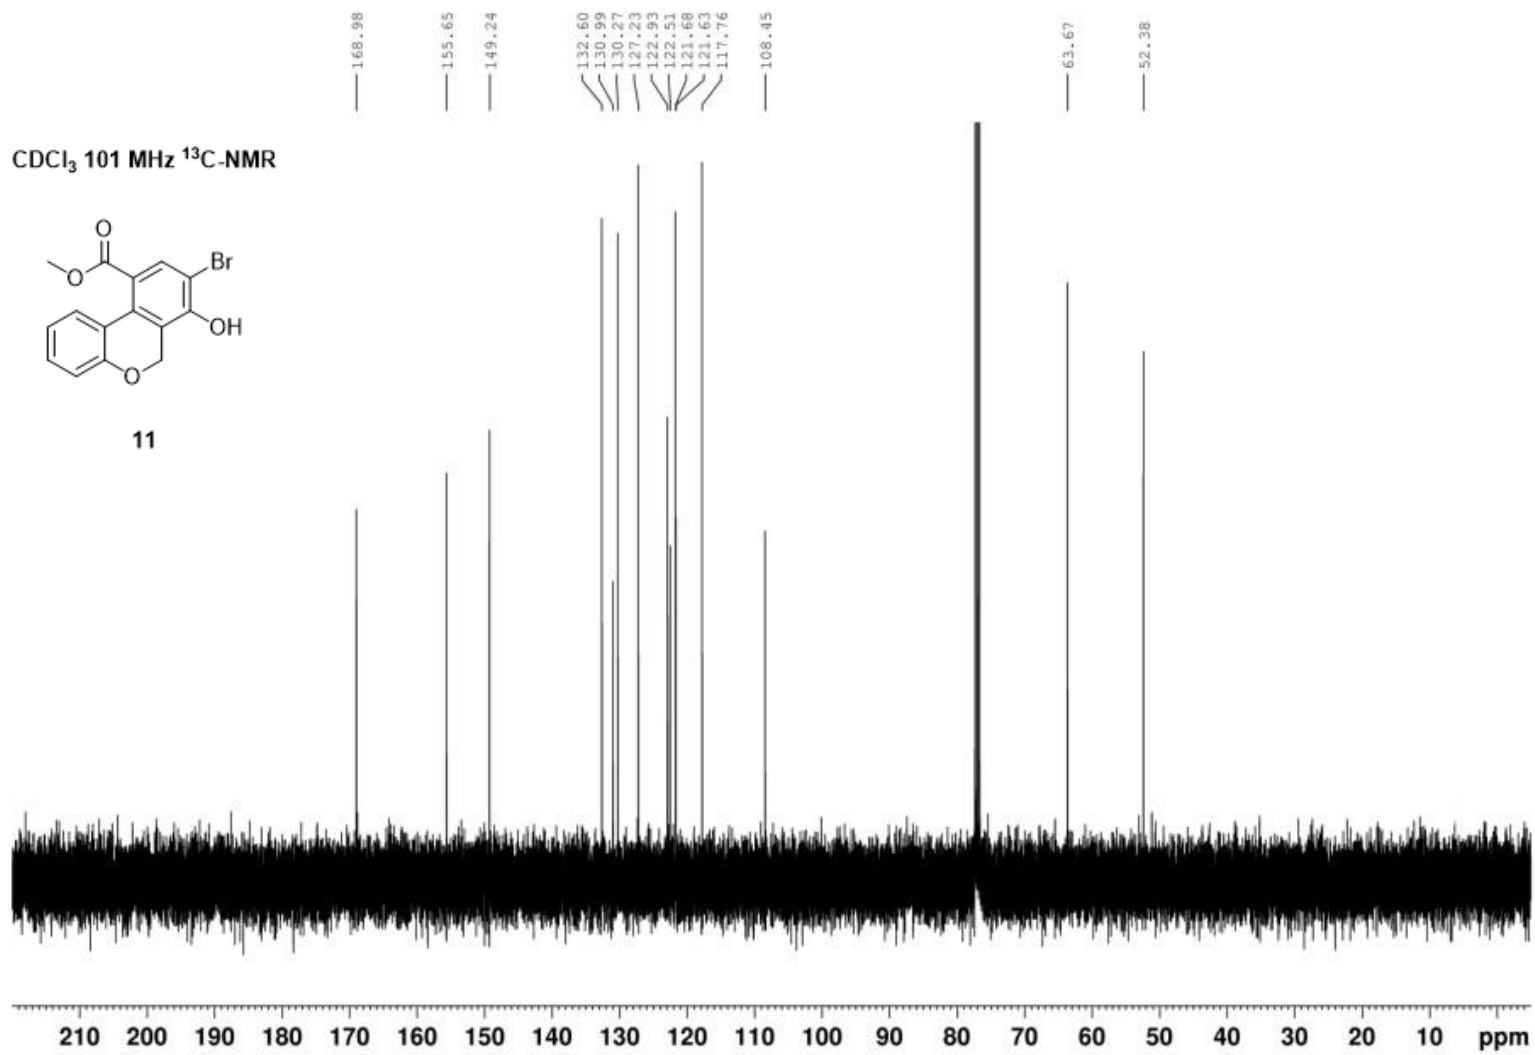

CDCl<sub>3</sub> 400 MHz <sup>1</sup>H-NMR

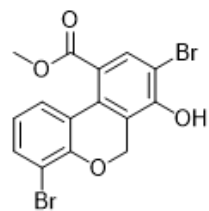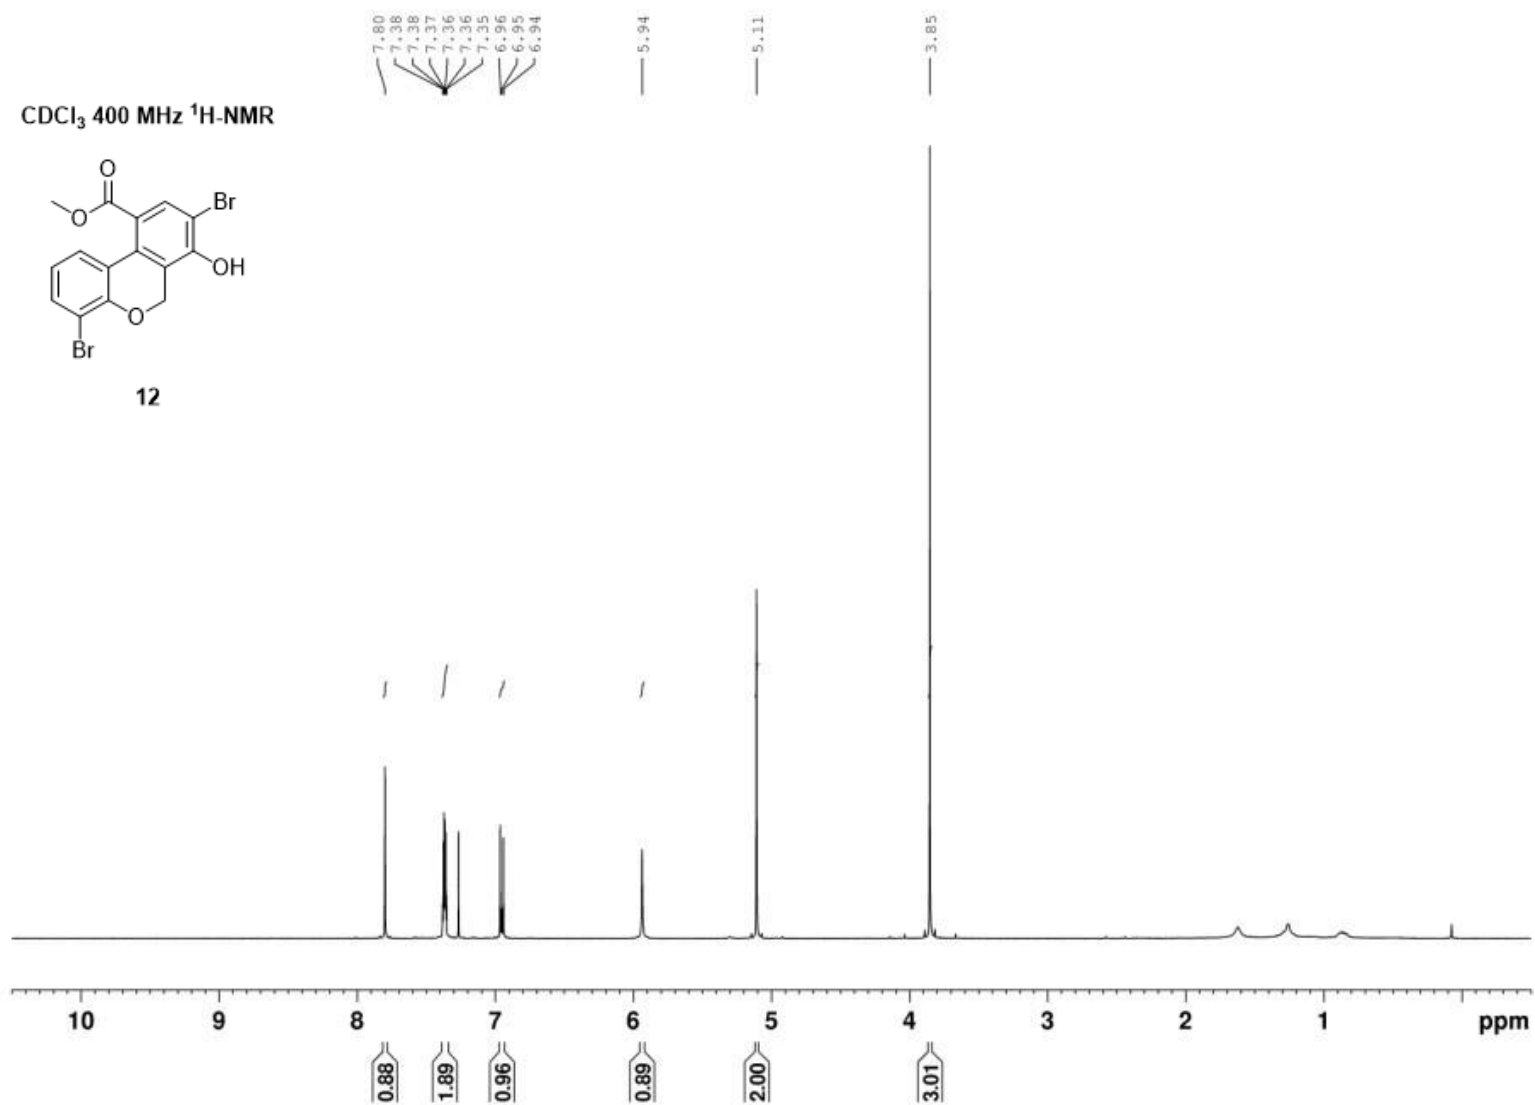

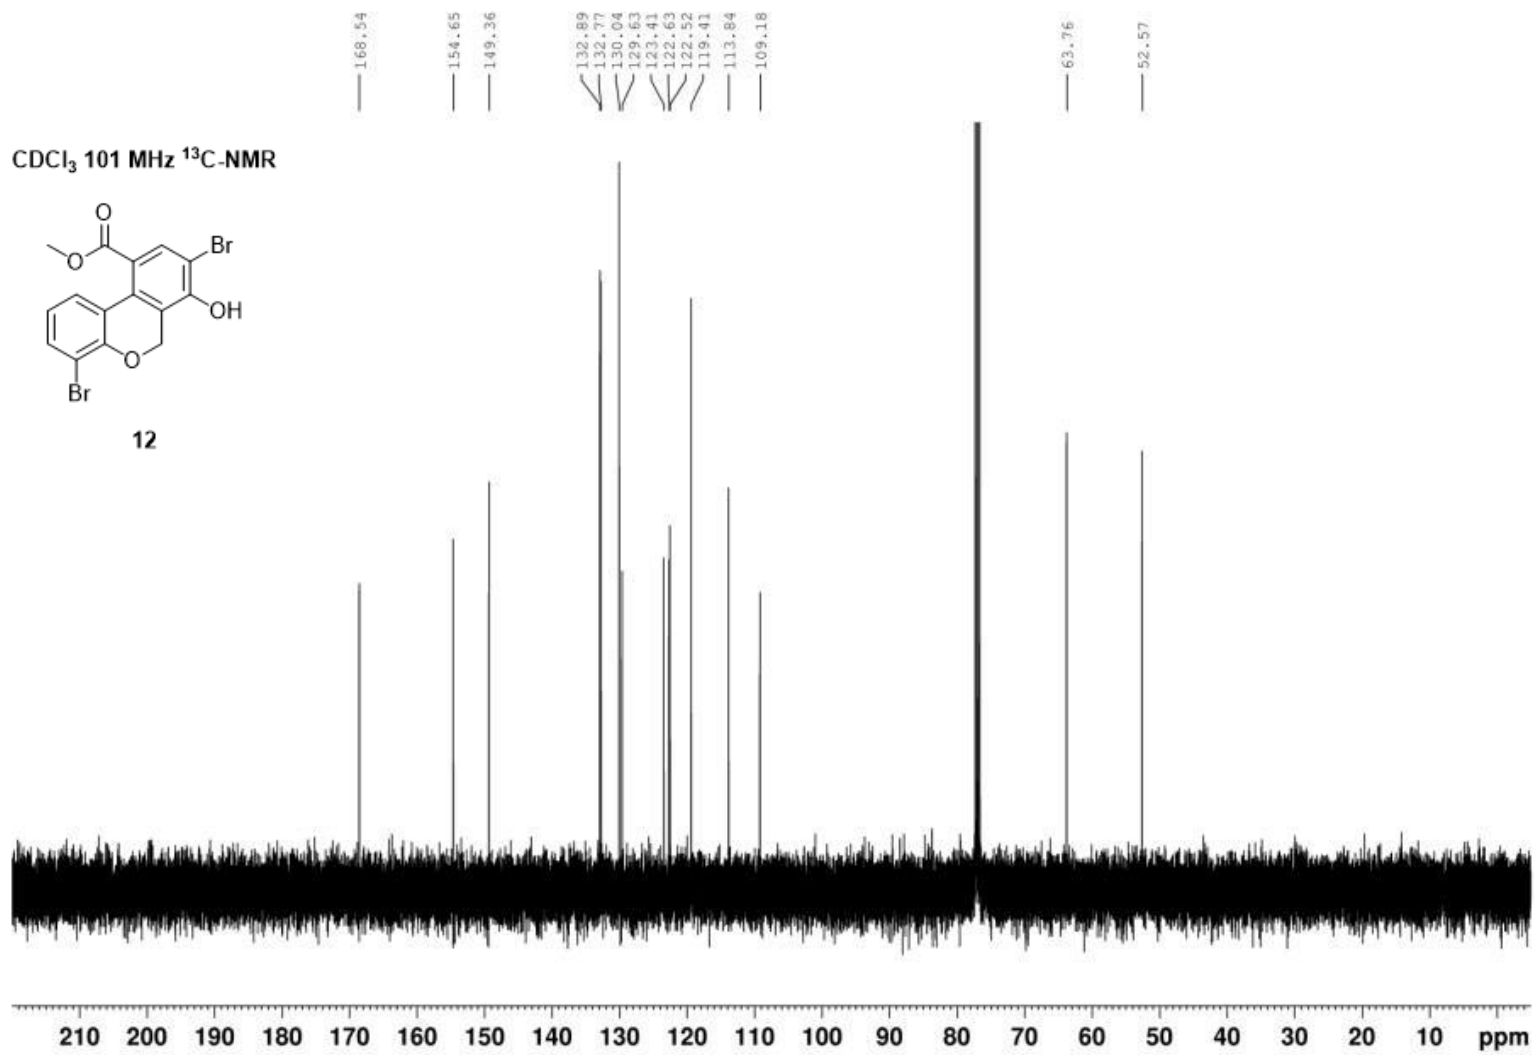

Supplement: d1ob01967h2.pdf [file d1ob01967h2.pdf]
